# Supplementary material for: Differences in Outcomes and Factors Associated With Mortality Among Patients With SARS-CoV-2 Infection and Cancer Compared With Those Without Cancer: A Systematic Review and Meta-analysis
Source: PubMed Central journal article supplement (PMC9086843; doi:10.1001/jamanetworkopen.2022.10880), 2022-05-09

## Supplementary Online Content

Khoury E, Nevitt S, Madsen WR, Turtle L, Davies G, Palmieri C. Differences in outcomes and factors associated with mortality among patients with SARS-CoV-2 infection and cancer compared with those without cancer: a systematic review and meta-analysis. *JAMA Netw Open*. 2022;5(5):e2210880. doi:10.1001/jamanetworkopen.2022.10880

**eTable 1.** Search Strategy Used for the Systematic Review in PubMed

**eTable 2.** Search Strategy Used for the Systematic Review in Web of Science

**eTable 3.** Search Strategy Used for the Systematic Review in Scopus

**eFigure 1.** Newcastle-Ottawa Scale for Quality Assessment of the Included Studies

**eFigure 2.** Funnel Plot of the Main Analysis of Mortality in Cancer Patients With COVID-19 to Control Patients

**eFigure 3.** PRISMA Chart for Study Selection

**eFigure 4.** Number of Cancer Patients Across 81 Studies, a Total of 61,532 Patients

**eTable 4.** Overview of Studies Included in Review

**eFigure 5.** Distribution of Cancer Patients Across 80 Studies

**eFigure 6.** Countries Included Across All Studies

**eTable 5.** Distribution of Cancer Patients by County

**eFigure 7.** Co-morbidities Experienced by Cancer Patients, Representing 21,697 Patients Across 56 Studies

**eFigure 8.** Percentage of Cancer Patients Without Co-morbidities, or With One or More Co-morbidities, Where Reported

**eFigure 9.** Summary of Reported Co-morbidities

**eFigure 10.** Chest Radiograph Chest X Ray Imaging on Admission With Radiological Changes Documented, Where Reported

**eFigure 11.** Setting of Care Across 80 Studies, Representing 22,918 Cancer Patients

**eTable 6.** Inpatient vs. Outpatient Care Across 73 Studies as Well as Possible or Probable Nosocomial Infection

**eTable 7.** Tumour Prevalence Across Studies Included

**eFigure 12.** Tumour Type Breakdown Across 68 Studies, Where Reported

**eResults.** Presenting Symptoms of SARS-CoV-2 Infection, Radiological Findings, Ethnicity and Stage of Malignancy and Outcome

### eReferences

**eFigure 13.** Presenting Symptoms, Includes 9,196 Patients

**eTable 8.** Chest Radiograph ± Chest X Ray Imaging on Admission With Radiological Changes Documented, Where Reported \*Nodules/Interstitial Thickening/Erratic Paving

**eFigure 14.** Forest Plot of Relative Risk of Mortality in Subgroup Analysis

**eTable 9.** Meta-Regression Results on the Impact of (A) Age, (B) Male Gender, and (C) Both Age and Male Gender

**eTable 10.** Patient Outcomes in 68 Studies

**eTable 11.** Median Duration of Hospital Stay (Days)

**eFigure 15.** Mortality Reported Across 81 Studies

**eTable 12.** Mortality of Cancer Patients Reported Across Studies

**eFigure 16.** Definition of Severe Event

**eFigure 17.** Significant Variables in Unadjusted (A) and Adjusted (B) Analyses Across Studies

**eFigure 18.** Variables Included in Adjusted Analysis Across Studies

**eFigure 19.** Forest Plot of Overall Pooled Case Fatality in Subgroup Analysis

**eTable 13.** Pooled Case Fatality Rates for Various Cancer Treatments

**eTable 14.** Table of Completed and Ongoing Cancer Observational Studies Related to the SARS-CoV-2/COVID-19 Pandemic in Patients With Malignant Disease

**eFigure 20.** Forest Plot of Relative Risk of Mortality in Different Cancer Types in the Subgroup Analysis

This supplementary material has been provided by the authors to give readers additional information about their work.

| Search number | Query                                                                                                                                                               | Search Details                                                                                                                                                                                                                                                                                                                                                                                                                                                                                                                                                                                                                                                                                                                                                                                                                                                                                                                                                                                                                                                                                                                                                                                                                                                                                                                                                                                                                                                                                                                                                                                                                                                                                                                                                                                                                                                                                                                                                                   | Results | Time     | Date       |
|---------------|---------------------------------------------------------------------------------------------------------------------------------------------------------------------|----------------------------------------------------------------------------------------------------------------------------------------------------------------------------------------------------------------------------------------------------------------------------------------------------------------------------------------------------------------------------------------------------------------------------------------------------------------------------------------------------------------------------------------------------------------------------------------------------------------------------------------------------------------------------------------------------------------------------------------------------------------------------------------------------------------------------------------------------------------------------------------------------------------------------------------------------------------------------------------------------------------------------------------------------------------------------------------------------------------------------------------------------------------------------------------------------------------------------------------------------------------------------------------------------------------------------------------------------------------------------------------------------------------------------------------------------------------------------------------------------------------------------------------------------------------------------------------------------------------------------------------------------------------------------------------------------------------------------------------------------------------------------------------------------------------------------------------------------------------------------------------------------------------------------------------------------------------------------------|---------|----------|------------|
| 14            | ((((cancer) OR (malignan*) OR (tumour)) OR (neoplasm)) AND (((2019-nCoV pneumonia OR (SARS-CoV-2)) OR (Coronavirus)) OR (COVID-19))) AND ((solid) OR (haematolog*)) | ("cancer s"[All Fields] OR "cancerated"[All Fields] OR "canceration"[All Fields] OR "cancerization"[All Fields] OR "cancerized"[All Fields] OR "cancerous"[All Fields] OR "neoplasms"[MeSH Terms] OR "neoplasms"[All Fields] OR "cancer"[All Fields] OR "cancers"[All Fields] OR "malignan*" [All Fields] OR ("cysts"[MeSH Terms] OR "cysts"[All Fields] OR "cyst"[All Fields] OR "neurofibroma"[MeSH Terms] OR "neurofibroma"[All Fields] OR "neurofibromas"[All Fields] OR "tumor s"[All Fields] OR "tumoral"[All Fields] OR "tumorous"[All Fields] OR "tumour"[All Fields] OR "neoplasms"[MeSH Terms] OR "neoplasms"[All Fields] OR "tumor"[All Fields] OR "tumour s"[All Fields] OR "tumoural"[All Fields] OR "tumourous"[All Fields] OR "tumours"[All Fields] OR "tumors"[All Fields] OR ("neoplasm s"[All Fields] OR "neoplasms"[MeSH Terms] OR "neoplasms"[All Fields] OR "neoplasm"[All Fields])) AND (((("severe acute respiratory syndrome coronavirus 2"[Supplementary Concept] OR "severe acute respiratory syndrome coronavirus 2"[All Fields] OR "2019 ncov"[All Fields]) AND ("pneumonia"[MeSH Terms] OR "pneumonia"[All Fields] OR "pneumoniae"[All Fields] OR "pneumonias"[All Fields] OR "pneumoniae s"[All Fields])) OR ("severe acute respiratory syndrome coronavirus 2"[Supplementary Concept] OR "severe acute respiratory syndrome coronavirus 2"[All Fields] OR "sars cov 2"[All Fields]) OR ("coronavirus"[MeSH Terms] OR "coronavirus"[All Fields] OR "coronaviruses"[All Fields]) OR ("severe acute respiratory syndrome coronavirus 2"[Supplementary Concept] OR "severe acute respiratory syndrome coronavirus 2"[All Fields] OR "ncov"[All Fields] OR "2019 ncov"[All Fields] OR "covid 19"[All Fields] OR "sars cov 2"[All Fields] OR ("coronavirus"[All Fields] OR "cov"[All Fields]) AND 2019/11/01:3000/12/31[Date - Publication]))) AND ("solid"[All Fields] OR "solid s"[All Fields] OR "solids"[All Fields] OR "haematolog*" [All Fields]) | 512     | 09:21:54 | 14/06/2021 |
| 13            | (solid) OR (haematolog*)                                                                                                                                            | "solid"[All Fields] OR "solid s"[All Fields] OR "solids"[All Fields] OR "haematolog*" [All Fields]                                                                                                                                                                                                                                                                                                                                                                                                                                                                                                                                                                                                                                                                                                                                                                                                                                                                                                                                                                                                                                                                                                                                                                                                                                                                                                                                                                                                                                                                                                                                                                                                                                                                                                                                                                                                                                                                               | 490,032 | 09:21:21 | 14/06/2021 |
| 12            | haematolog*                                                                                                                                                         | "haematolog*" [All Fields]                                                                                                                                                                                                                                                                                                                                                                                                                                                                                                                                                                                                                                                                                                                                                                                                                                                                                                                                                                                                                                                                                                                                                                                                                                                                                                                                                                                                                                                                                                                                                                                                                                                                                                                                                                                                                                                                                                                                                       | 90,344  | 09:20:30 | 14/06/2021 |
| 11            | solid                                                                                                                                                               | "solid"[All Fields] OR "solid s"[All Fields] OR "solids"[All Fields]                                                                                                                                                                                                                                                                                                                                                                                                                                                                                                                                                                                                                                                                                                                                                                                                                                                                                                                                                                                                                                                                                                                                                                                                                                                                                                                                                                                                                                                                                                                                                                                                                                                                                                                                                                                                                                                                                                             | 402,191 | 09:20:00 | 14/06/2021 |

| Search number | Query                                                                  | Search Details                                                                                                                                                                                                                                                                                                                                                                                                                                                                                                                                                                                                                                                                                                                                                                                                                                                                                                                                         | Results   | Time     | Date       |
|---------------|------------------------------------------------------------------------|--------------------------------------------------------------------------------------------------------------------------------------------------------------------------------------------------------------------------------------------------------------------------------------------------------------------------------------------------------------------------------------------------------------------------------------------------------------------------------------------------------------------------------------------------------------------------------------------------------------------------------------------------------------------------------------------------------------------------------------------------------------------------------------------------------------------------------------------------------------------------------------------------------------------------------------------------------|-----------|----------|------------|
| 10            | ((2019-nCoV pneumonia) OR (SARS-CoV-2)) OR (Coronavirus) OR (COVID-19) | (("severe acute respiratory syndrome coronavirus 2"[Supplementary Concept] OR "severe acute respiratory syndrome coronavirus 2"[All Fields] OR "2019 ncov"[All Fields]) AND ("pneumonia"[MeSH Terms] OR "pneumonia"[All Fields] OR "pneumoniae"[All Fields] OR "pneumonias"[All Fields] OR "pneumoniae s"[All Fields])) OR ("severe acute respiratory syndrome coronavirus 2"[Supplementary Concept] OR "severe acute respiratory syndrome coronavirus 2"[All Fields] OR "sars cov 2"[All Fields]) OR ("coronavirus"[MeSH Terms] OR "coronavirus"[All Fields] OR "coronaviruses"[All Fields]) OR ("severe acute respiratory syndrome coronavirus 2"[Supplementary Concept] OR "severe acute respiratory syndrome coronavirus 2"[All Fields] OR "ncov"[All Fields] OR "2019 ncov"[All Fields] OR "covid 19"[All Fields] OR "sars cov 2"[All Fields] OR ("coronavirus"[All Fields] OR "cov"[All Fields]) AND 2019/11/01:3000/12/31[Date - Publication])) | 161,008   | 09:19:24 | 14/06/2021 |
| 9             | COVID-19                                                               | "severe acute respiratory syndrome coronavirus 2"[Supplementary Concept] OR "severe acute respiratory syndrome coronavirus 2"[All Fields] OR "ncov"[All Fields] OR "2019 ncov"[All Fields] OR "covid 19"[All Fields] OR "sars cov 2"[All Fields] OR ("coronavirus"[All Fields] OR "cov"[All Fields]) AND 2019/11/01:3000/12/31[Date - Publication]                                                                                                                                                                                                                                                                                                                                                                                                                                                                                                                                                                                                     | 145,752   | 09:19:08 | 14/06/2021 |
| 8             | coronavirus                                                            | "coronavirus"[MeSH Terms] OR "coronavirus"[All Fields] OR "coronaviruses"[All Fields]                                                                                                                                                                                                                                                                                                                                                                                                                                                                                                                                                                                                                                                                                                                                                                                                                                                                  | 116,456   | 09:19:00 | 14/06/2021 |
| 7             | SARS-CoV-2                                                             | "severe acute respiratory syndrome coronavirus 2"[Supplementary Concept] OR "severe acute respiratory syndrome coronavirus 2"[All Fields] OR "sars cov 2"[All Fields]                                                                                                                                                                                                                                                                                                                                                                                                                                                                                                                                                                                                                                                                                                                                                                                  | 89,189    | 09:18:53 | 14/06/2021 |
| 6             | 2019-nCoV pneumonia                                                    | ("severe acute respiratory syndrome coronavirus 2"[Supplementary Concept] OR "severe acute respiratory syndrome coronavirus 2"[All Fields] OR "2019 ncov"[All Fields]) AND ("pneumonia"[MeSH Terms] OR "pneumonia"[All Fields] OR "pneumoniae"[All Fields] OR "pneumonias"[All Fields] OR "pneumoniae s"[All Fields])                                                                                                                                                                                                                                                                                                                                                                                                                                                                                                                                                                                                                                  | 71,085    | 09:18:43 | 14/06/2021 |
| 5             | ((cancer) OR (malignan*)) OR (tumour) OR (neoplasm)                    | "cancer s"[All Fields] OR "cancerated"[All Fields] OR "canceration"[All Fields] OR "cancerization"[All Fields] OR "cancerized"[All Fields] OR "cancerous"[All Fields] OR "neoplasms"[MeSH Terms] OR "neoplasms"[All Fields] OR "cancer"[All Fields] OR "cancers"[All Fields] OR "malignan*"[All Fields] OR "cysts"[MeSH Terms] OR "cysts"[All Fields] OR "cyst"[All Fields] OR "neurofibroma"[MeSH Terms] OR "neurofibroma"[All Fields] OR "neurofibromas"[All Fields] OR "tumor s"[All Fields] OR "tumoral"[All Fields] OR "tumorous"[All Fields] OR "tumour"[All Fields] OR "neoplasms"[MeSH Terms] OR "neoplasms"[All Fields] OR "tumor"[All Fields] OR "tumour s"[All Fields] OR "tumoural"[All Fields] OR "tumourous"[All Fields] OR "tumours"[All Fields] OR "tumors"[All Fields] OR "neoplasm s"[All Fields] OR "neoplasms"[MeSH Terms] OR "neoplasms"[All Fields] OR "neoplasm"[All Fields]                                                    | 4,997,027 | 09:18:33 | 14/06/2021 |

| Search number | Query     | Search Details                                                                                                                                                                                                                                                                                                                                                                                                                                                               | Results   | Time     | Date       |
|---------------|-----------|------------------------------------------------------------------------------------------------------------------------------------------------------------------------------------------------------------------------------------------------------------------------------------------------------------------------------------------------------------------------------------------------------------------------------------------------------------------------------|-----------|----------|------------|
| 4             | neoplasm  | "neoplasm s"[All Fields] OR "neoplasms"[MeSH Terms] OR "neoplasms"[All Fields] OR "neoplasm"[All Fields]                                                                                                                                                                                                                                                                                                                                                                     | 3,558,546 | 09:18:19 | 14/06/2021 |
| 3             | tumour    | "cysts"[MeSH Terms] OR "cysts"[All Fields] OR "cyst"[All Fields] OR "neurofibroma"[MeSH Terms] OR "neurofibroma"[All Fields] OR "neurofibromas"[All Fields] OR "tumor s"[All Fields] OR "tumoral"[All Fields] OR "tumorous"[All Fields] OR "tumour"[All Fields] OR "neoplasms"[MeSH Terms] OR "neoplasms"[All Fields] OR "tumor"[All Fields] OR "tumour s"[All Fields] OR "tumoural"[All Fields] OR "tumourous"[All Fields] OR "tumours"[All Fields] OR "tumors"[All Fields] | 4,274,667 | 09:18:14 | 14/06/2021 |
| 2             | malignan* | "malignan*"[All Fields]                                                                                                                                                                                                                                                                                                                                                                                                                                                      | 621,529   | 09:18:07 | 14/06/2021 |
| 1             | cancer    | "cancer s"[All Fields] OR "cancerated"[All Fields] OR "canceration"[All Fields] OR "cancerization"[All Fields] OR "cancerized"[All Fields] OR "cancerous"[All Fields] OR "neoplasms"[MeSH Terms] OR "neoplasms"[All Fields] OR "cancer"[All Fields] OR "cancers"[All Fields]                                                                                                                                                                                                 | 4,373,309 | 09:18:01 | 14/06/2021 |

**eTable 1** Search strategy used for the systematic review in PubMed.

| Set | Results   | Search History                                                                                                                                                     | Date       |
|-----|-----------|--------------------------------------------------------------------------------------------------------------------------------------------------------------------|------------|
| #14 | 232       | #13 AND #10 AND #5<br><i>Indexes=SCI-EXPANDED, SSCI, A&amp;HCI, CPCI-S, CPCI-SSH, BKCI-S, BKCI-SSH, ESCI, CCR-EXPANDED, IC Timespan=All years</i>                  | 14/06/2021 |
| #13 | 1,402,806 | #12 OR #11<br><i>Indexes=SCI-EXPANDED, SSCI, A&amp;HCI, CPCI-S, CPCI-SSH, BKCI-S, BKCI-SSH, ESCI, CCR-EXPANDED, IC Timespan=All years</i>                          | 14/06/2021 |
| #12 | 29,734    | <b>TOPIC:</b> (haematolog*)<br><i>Indexes=SCI-EXPANDED, SSCI, A&amp;HCI, CPCI-S, CPCI-SSH, BKCI-S, BKCI-SSH, ESCI, CCR-EXPANDED, IC Timespan=All years</i>         | 14/06/2021 |
| #11 | 1,374,645 | <b>TOPIC:</b> (solid)<br><i>Indexes=SCI-EXPANDED, SSCI, A&amp;HCI, CPCI-S, CPCI-SSH, BKCI-S, BKCI-SSH, ESCI, CCR-EXPANDED, IC Timespan=All years</i>               | 14/06/2021 |
| #10 | 156,260   | #9 OR #8 OR #7 OR #6<br><i>Indexes=SCI-EXPANDED, SSCI, A&amp;HCI, CPCI-S, CPCI-SSH, BKCI-S, BKCI-SSH, ESCI, CCR-EXPANDED, IC Timespan=All years</i>                | 14/06/2021 |
| #9  | 128,800   | <b>TOPIC:</b> (COVID-19)<br><i>Indexes=SCI-EXPANDED, SSCI, A&amp;HCI, CPCI-S, CPCI-SSH, BKCI-S, BKCI-SSH, ESCI, CCR-EXPANDED, IC Timespan=All years</i>            | 14/06/2021 |
| #8  | 69,653    | <b>TOPIC:</b> (Coronavirus)<br><i>Indexes=SCI-EXPANDED, SSCI, A&amp;HCI, CPCI-S, CPCI-SSH, BKCI-S, BKCI-SSH, ESCI, CCR-EXPANDED, IC Timespan=All years</i>         | 14/06/2021 |
| #7  | 39,067    | <b>TOPIC:</b> (SARS-CoV-2)<br><i>Indexes=SCI-EXPANDED, SSCI, A&amp;HCI, CPCI-S, CPCI-SSH, BKCI-S, BKCI-SSH, ESCI, CCR-EXPANDED, IC Timespan=All years</i>          | 14/06/2021 |
| #6  | 498       | <b>TOPIC:</b> (2019-nCoV pneumonia)<br><i>Indexes=SCI-EXPANDED, SSCI, A&amp;HCI, CPCI-S, CPCI-SSH, BKCI-S, BKCI-SSH, ESCI, CCR-EXPANDED, IC Timespan=All years</i> | 14/06/2021 |
| #5  | 3,929,534 | #4 OR #3 OR #2 OR #1<br><i>Indexes=SCI-EXPANDED, SSCI, A&amp;HCI, CPCI-S, CPCI-SSH, BKCI-S, BKCI-SSH, ESCI, CCR-EXPANDED, IC Timespan=All years</i>                | 14/06/2021 |
| #4  | 201,475   | <b>TOPIC:</b> (neoplasm)<br><i>Indexes=SCI-EXPANDED, SSCI, A&amp;HCI, CPCI-S, CPCI-SSH, BKCI-S, BKCI-SSH, ESCI, CCR-EXPANDED, IC Timespan=All years</i>            | 14/06/2021 |
| #3  | 1,906,360 | <b>TOPIC:</b> (tumour)<br><i>Indexes=SCI-EXPANDED, SSCI, A&amp;HCI, CPCI-S, CPCI-SSH, BKCI-S, BKCI-SSH, ESCI, CCR-EXPANDED, IC Timespan=All years</i>              | 14/06/2021 |
| #2  | 604,111   | <b>TOPIC:</b> (malignan*)<br><i>Indexes=SCI-EXPANDED, SSCI, A&amp;HCI, CPCI-S, CPCI-SSH, BKCI-S, BKCI-SSH, ESCI, CCR-EXPANDED, IC Timespan=All years</i>           | 14/06/2021 |
| # 1 | 2,709,682 | <b>TOPIC:</b> (cancer)<br><i>Indexes=SCI-EXPANDED, SSCI, A&amp;HCI, CPCI-S, CPCI-SSH, BKCI-S, BKCI-SSH, ESCI, CCR-EXPANDED, IC Timespan=All years</i>              | 14/06/2021 |

**eTable 2.** Search strategy used for the systematic review in Web of Science.

| Search Number | Search History                                                                                                                                                                                                                                            | Document results | Date       |
|---------------|-----------------------------------------------------------------------------------------------------------------------------------------------------------------------------------------------------------------------------------------------------------|------------------|------------|
| 14            | (( TITLE-ABS-KEY ( cancer )) OR ( TITLE-ABS-KEY ( malignan* )) OR ( TITLE-ABS-KEY ( tumour )) OR ( TITLE-ABS-KEY ( neoplasm ))) AND (( 2019-ncov AND pneumonia ) OR ( sars-cov-2 ) OR ( coronavirus ) OR ( covid-19 )) AND (( solid ) OR ( haematolog* )) | 364              | 14/06/2021 |
| 13            | ( solid ) OR ( haematolog* )                                                                                                                                                                                                                              | 1,797,587        | 14/06/2021 |
| 12            | haematolog*                                                                                                                                                                                                                                               | 44,098           | 14/06/2021 |
| 11            | solid                                                                                                                                                                                                                                                     | 1,755,385        | 14/06/2021 |
| 10            | ( 2019-ncov AND pneumonia ) OR ( sars-cov-2 ) OR ( coronavirus ) OR ( covid-19 )                                                                                                                                                                          | 192,773          | 14/06/2021 |
| 9             | covid-19                                                                                                                                                                                                                                                  | 155,108          | 14/06/2021 |
| 8             | coronavirus                                                                                                                                                                                                                                               | 134,571          | 14/06/2021 |
| 7             | sars-cov-2                                                                                                                                                                                                                                                | 63,082           | 14/06/2021 |
| 6             | 2019-ncov AND pneumonia                                                                                                                                                                                                                                   | 988              | 14/06/2021 |
| 5             | ( TITLE-ABS-KEY ( cancer )) OR ( TITLE-ABS-KEY ( malignan* )) OR ( TITLE-ABS-KEY ( tumour )) OR ( TITLE-ABS-KEY ( neoplasm ))                                                                                                                             | 5,338,087        | 14/06/2021 |
| 4             | neoplasm                                                                                                                                                                                                                                                  | 2,712,836        | 14/06/2021 |
| 3             | tumour                                                                                                                                                                                                                                                    | 3,447,845        | 14/06/2021 |
| 2             | malignan*                                                                                                                                                                                                                                                 | 805,290          | 14/06/2021 |
| 1             | Cancer                                                                                                                                                                                                                                                    | 3,358,220        | 14/06/2021 |

**eTable 3.** Search strategy used for the systematic review in Scopus.

| Study                   | Selection | Comparability | Outcome | Total |
|-------------------------|-----------|---------------|---------|-------|
| Sharafeldin et al       | ****      | *             | **      | 6     |
| Grivas et al            | ****      | *             | ****    | 7     |
| Docherty et al          | ****      | **            | ****    | 8     |
| Özdemir et al           | ****      | *             | ****    | 7     |
| Lièvre et al            | ****      | *             | ****    | 7     |
| Lee et al               | ****      | **            | **      | 7     |
| Fratino et al           | **        | -             | *       | 3     |
| Pinato et al            | **        | **            | ****    | 7     |
| Yigenoglu et al         | ****      | *             | *       | 6     |
| Johannesen et al        | ****      | *             | *       | 5     |
| Passamonti et al        | ****      | *             | ****    | 7     |
| Rüthrich et al          | ****      | *             | *       | 6     |
| Montopoli et al         | ****      | -             | *       | 4     |
| Robilotti et al         | ****      | -             | ****    | 6     |
| de Joode et al          | ****      | *             | **      | 6     |
| Miyashita et al         | ****      | *             | **      | 7     |
| Graeselli et al         | *         | -             | ****    | 4     |
| Lunski et al            | ****      | **            | ****    | 9     |
| Jee et al               | ****      | -             | ****    | 6     |
| Song et al              | ****      | **            | ****    | 8     |
| COVIDSurg Collaborative | ****      | **            | ****    | 8     |
| Tian et al              | ****      | **            | *       | 6     |
| Di Cosimo et al         | ****      | *             | ****    | 7     |
| Mehta V et al           | ****      | **            | **      | 7     |
| Yang Ket al             | ****      | *             | ****    | 7     |
| Ferrari et al           | ****      | *             | ****    | 7     |
| Garassino et al         | **        | **            | **      | 6     |
| Mato et al              | ****      | *             | ****    | 7     |
| Scarfo et al            | ****      | -             | ****    | 6     |
| Mehta A et al           | ****      | **            | ****    | 8     |
| de Melo et al           | ****      | *             | **      | 6     |
| Albiges et al           | ****      | **            | ****    | 8     |
| Martinez-Lopez et al    | ****      | *             | *       | 6     |
| Russell et al           | ****      | -             | ****    | 6     |
| Basse et al             | ****      | *             | **      | 6     |
| Lara et al              | ****      | *             | *       | 5     |
| Brar et al              | ****      | **            | *       | 7     |
| Angelis et al           | ****      | **            | *       | 6     |
| Gupta et al             | **        | *             | ****    | 6     |
| Meng et al              | ****      | *             | **      | 7     |
| Deng et al              | **        | -             | *       | 3     |
| Kabarriti et al         | ****      | -             | *       | 4     |
| Zhang H et al           | *         | *             | **      | 4     |
| Dai et al               | ****      | *             | ****    | 8     |
| Luo et al               | ****      | -             | ****    | 6     |
| Cattaneo et al          | ****      | -             | ****    | 6     |
| Hultcrantz et al        | ****      | *             | ****    | 7     |
| Singh et al             | ****      | **            | ****    | 8     |
| Shah et al              | ****      | *             | *       | 6     |
| Cook et al              | ****      | -             | *       | 4     |
| Erdal et al             | ****      | -             | ****    | 6     |
| Sun et al               | ****      | **            | *       | 7     |
| Booth et al             | ****      | -             | ****    | 7     |
| Yarza et al             | ****      | -             | ****    | 7     |
| Vuagnat et al           | ****      | -             | ****    | 7     |
| Wang B et al            | ****      | -             | *       | 5     |
| Assaad et al            | ****      | -             | ****    | 6     |
| Fox et al               | ****      | -             | ****    | 6     |
| Yang F et al            | ****      | -             | *       | 4     |
| Suleyman et al          | ****      | **            | *       | 6     |
| Rogado et al            | ****      | *             | **      | 6     |
| Sanchez-Pina et al      | ****      | *             | ****    | 7     |
| Ma et al                | **        | -             | -       | 2     |
| Aries et al             | ****      | -             | **      | 5     |
| Martin-Moro et al       | ****      | *             | ****    | 7     |
| Joharatnam-Hogan et al  | ****      | *             | **      | 6     |
| Zhang L et al           | **        | *             | **      | 5     |
| Kalinsky et al          | ****      | -             | ****    | 6     |
| Malard et al            | ****      | -             | *       | 4     |
| Stroppa et al           | *         | *             | **      | 4     |
| Ciceri et al            | **        | *             | ****    | 6     |
| Tomlins et al           | **        | -             | ****    | 5     |
| Bogani et al            | ****      | -             | *       | 4     |
| Liang et al             | ****      | *             | ****    | 7     |
| Guan et al              | ****      | **            | **      | 7     |
| Tagliamento et al       | ****      | -             | **      | 5     |
| Wang L et al            | ****      | *             | **      | 6     |
| He et al                | **        | *             | **      | 5     |
| Lattenist et al         | ****      | -             | *       | 4     |
| Yu et al                | ****      | -             | *       | 4     |
| Wu et al                | ****      | -             | *       | 4     |

eFigure 1. Newcastle-Ottawa scale for quality assessment of the included studies.



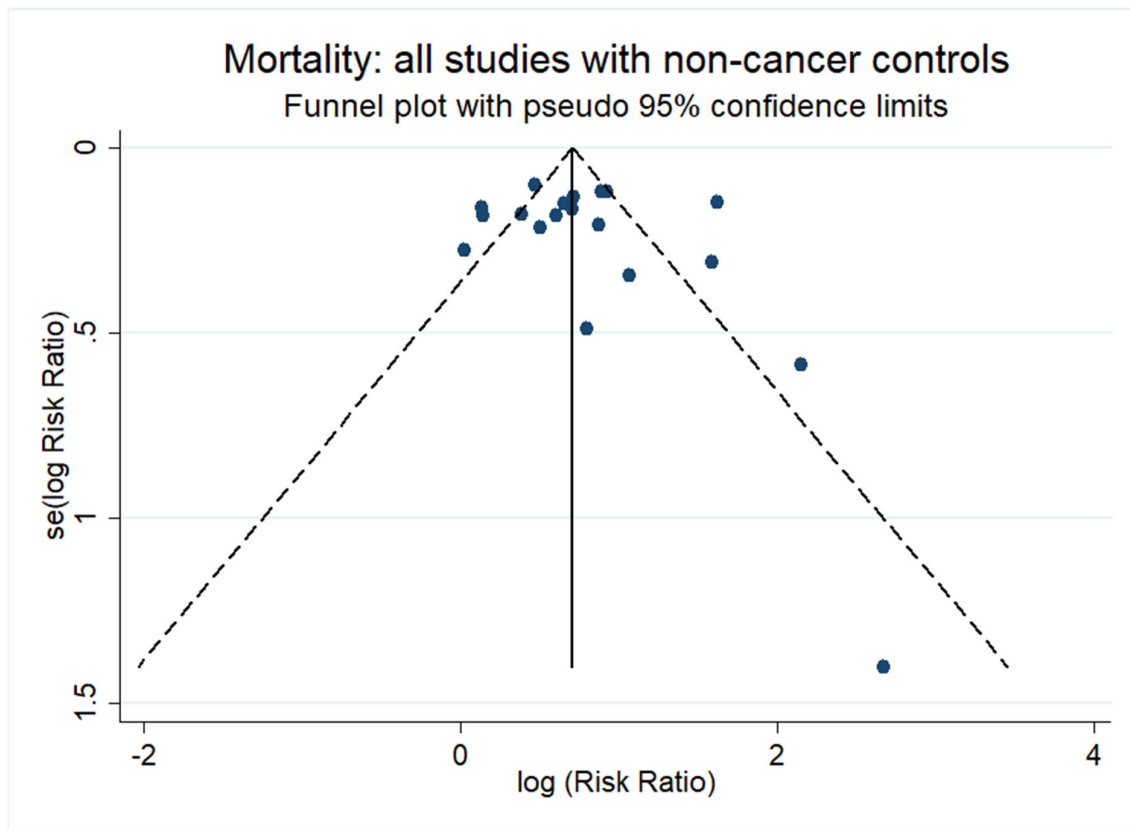

**eFigure 2.** Funnel plot of the main analysis of mortality in cancer patients with COVID-19 to control patients.

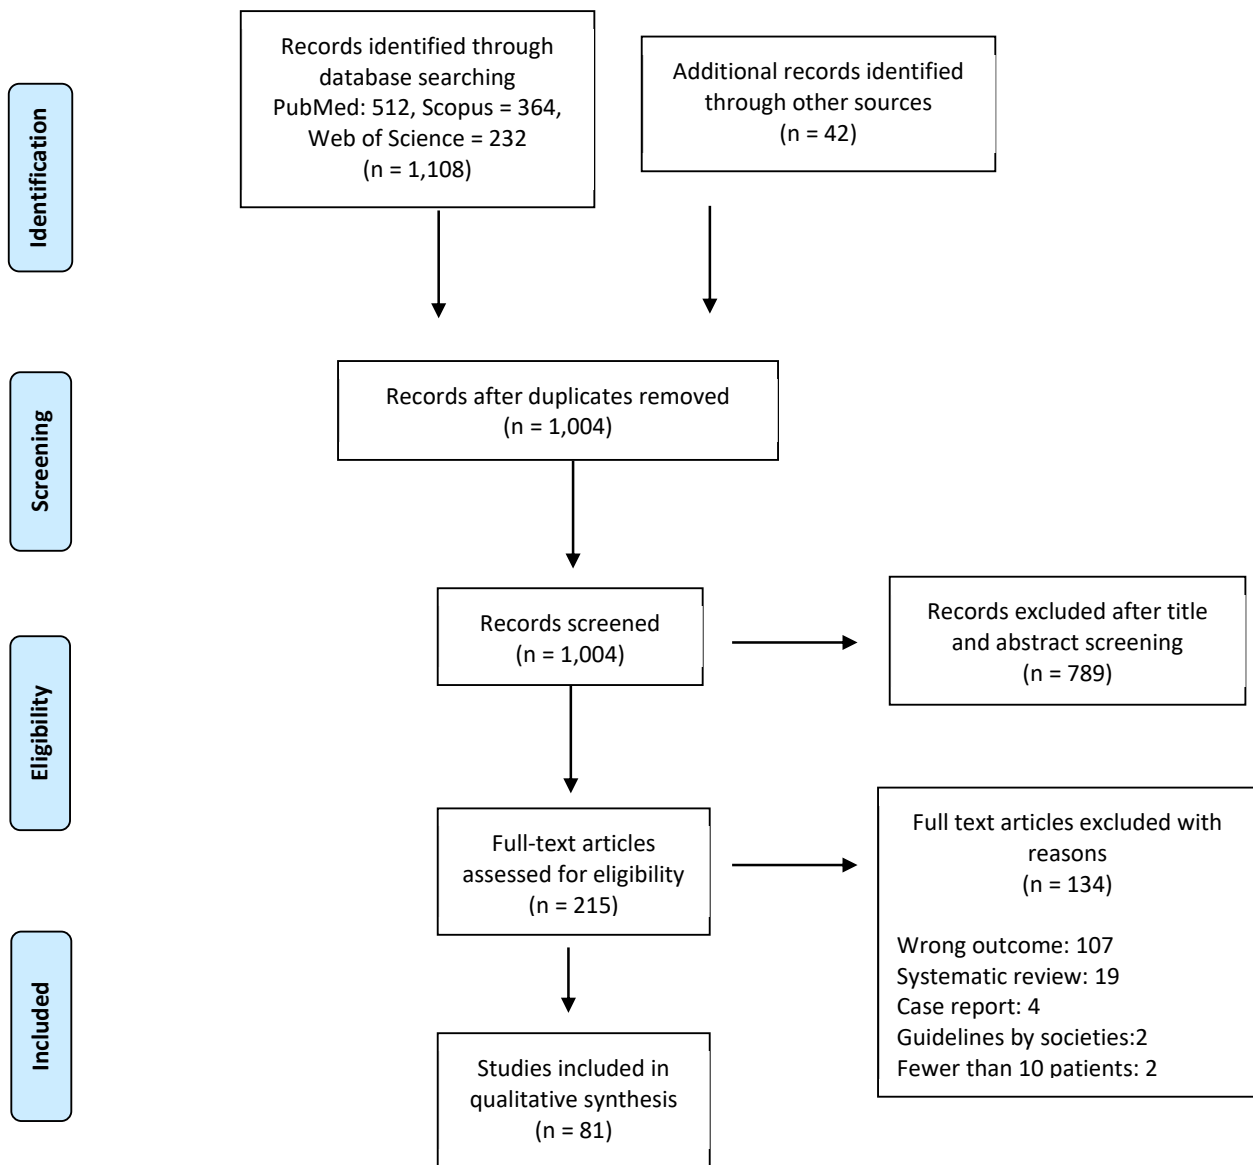

**Figure 3** PRISMA chart for study selection

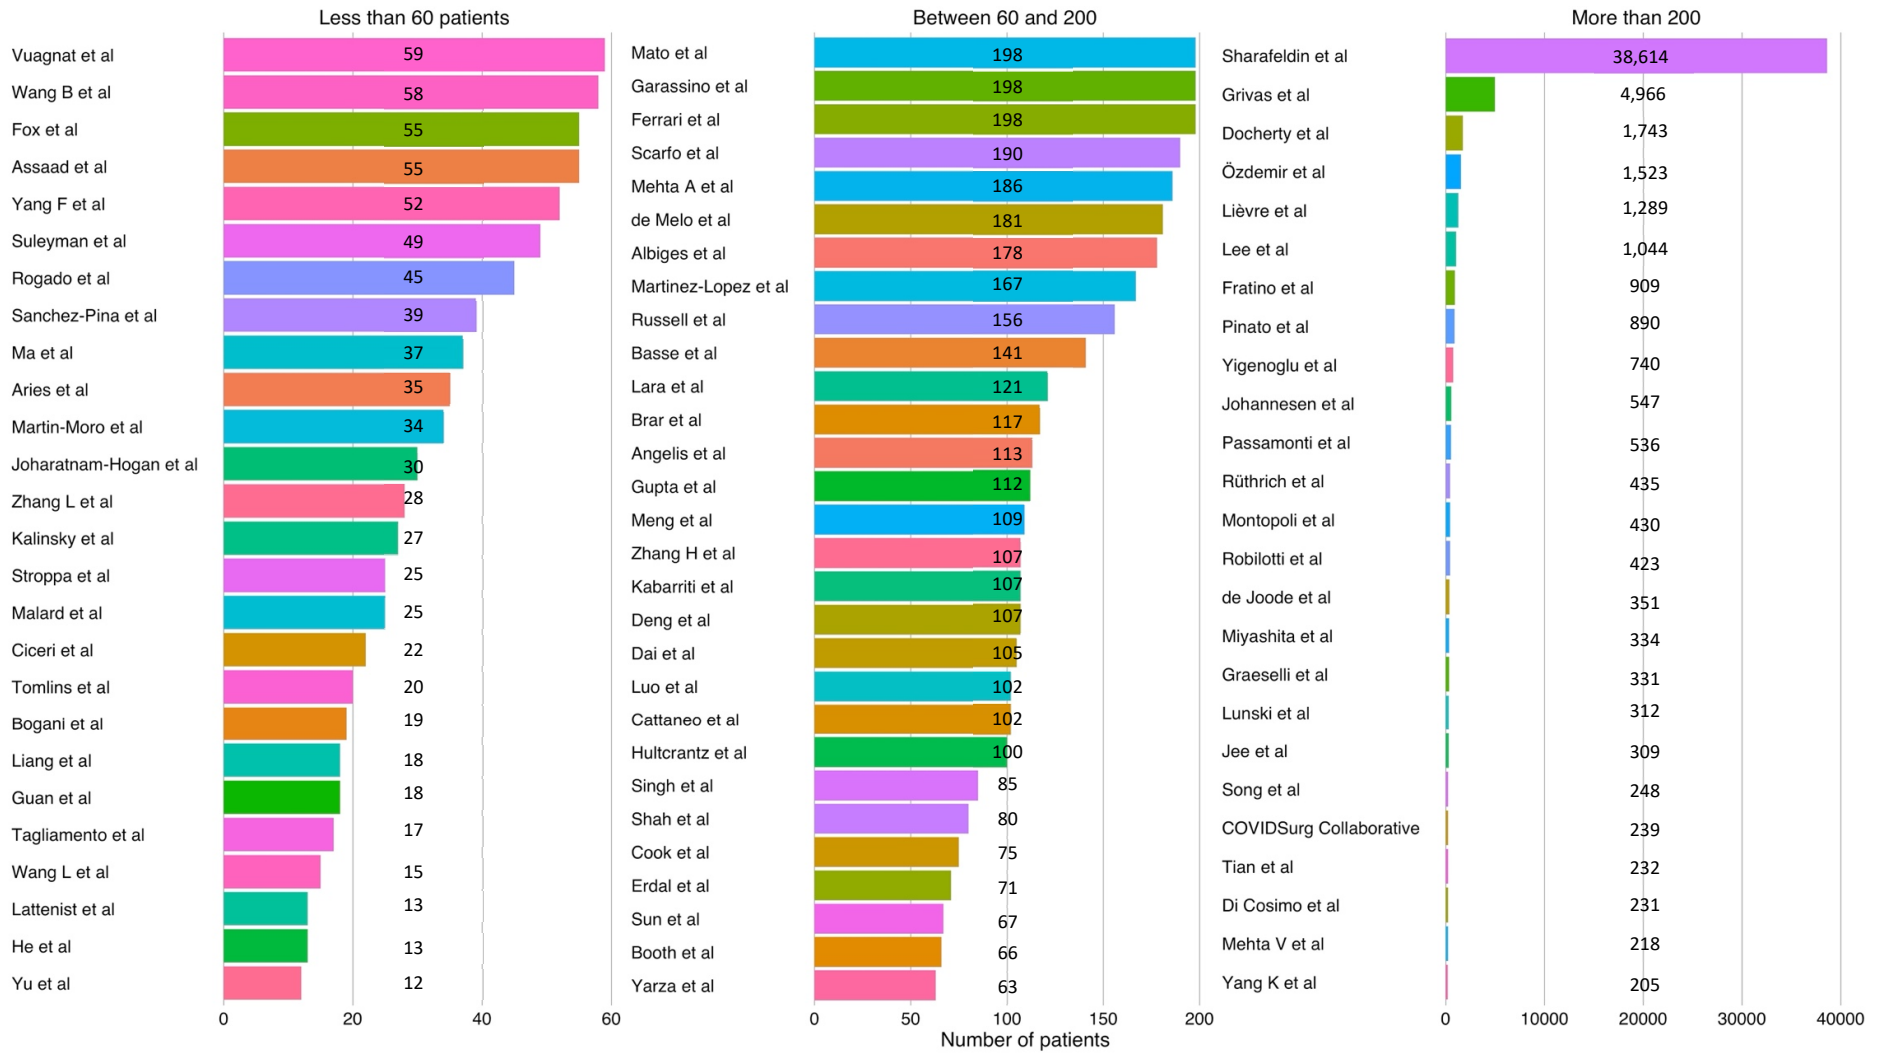

**eFigure 4.** Number of Cancer Patients Across 81 Studies, a Total of 61,532 Patients

| Publication       | Country                  | Study type                                       | Time period                                         | Cancer patients | Cancer type                 | Cancer vs non cancer cohort | Presenting symptoms | Co-morbidities | Impact of cancer treatment | Severity | Outcome |
|-------------------|--------------------------|--------------------------------------------------|-----------------------------------------------------|-----------------|-----------------------------|-----------------------------|---------------------|----------------|----------------------------|----------|---------|
| Sharafeldin et al | USA                      | N3C Cohort, multicentre, retrospective           | 1st January 2020 to 25th March 2021                 | 38,614          | Any                         |                             |                     |                |                            |          |         |
| Grivas et al *    | Multicentre <sup>1</sup> | Covid-19 and Cancer Consortium registry database | 17th March to 16th April 2020                       | 4966            | Any                         |                             |                     |                |                            |          |         |
| Docherty et al    | United Kingdom           | Multi-centre, 208 centres, prospective           | 6th February to 19th April 2020                     | 1743            | Any                         |                             |                     |                |                            |          |         |
| Özdemir et al     | Turkey                   | Multi centre, retro-prospective                  | 11th March to 20th May 2020                         | 1523            | Solid cancers               |                             |                     |                |                            |          |         |
| Lièvre et al      | France                   | Multi-centre, retro-prospective                  | 4 <sup>th</sup> April to 11 <sup>th</sup> June 2020 | 1289            | Solid cancers               |                             |                     |                |                            |          |         |
| Lee et al *       | United Kingdom           | Multi-centre, prospective                        | 18th March to 8th May 2020                          | 1044            | Any                         |                             |                     |                |                            |          |         |
| Fratino et al     | Italy                    | Multi centre, retrospective                      | Up to 30th March 2020                               | 909             | Any                         |                             |                     |                |                            |          |         |
| Pinato et al      | Multicentre <sup>2</sup> | Multi-centre, 19 centres, retrospective          | 26th February to 1st April 2020                     | 890             | Any                         |                             |                     |                |                            |          |         |
| Yigenoglu et al   | Turkey                   | Multi centre, retrospective                      | 11th March to 22nd June 2020                        | 740             | Haematological malignancies |                             |                     |                |                            |          |         |
| Johannesen et al  | Norway                   | Multi-centre, retrospective                      | 1st January to 31st May 2020                        | 547             | Any                         |                             |                     |                |                            |          |         |
| Passamonti et al  | Italy                    | Multi-centre, retrospective                      | 25th February to 18th May 2020                      | 536             | Haematological malignancies |                             |                     |                |                            |          |         |

| Publication             | Country                   | Study type                              | Time period                                        | Cancer patients | Cancer type              | Cancer vs non cancer cohort | Presenting symptoms | Co-morbidities | Impact of cancer treatment | Severity | Outcome |
|-------------------------|---------------------------|-----------------------------------------|----------------------------------------------------|-----------------|--------------------------|-----------------------------|---------------------|----------------|----------------------------|----------|---------|
| Rüthrich et al          | Germany                   | Multi centre, retrospective             | 16th March to 31st August 2020                     | 435             | Any                      |                             |                     |                |                            |          |         |
| Montopoli et al         | Italy                     | Multi-centre, 68 centres, retrospective | Up to 1st April 2020                               | 430             | Any (male patients only) |                             |                     |                |                            |          |         |
| Robilotti et al         | USA                       | Single centre, retrospective            | 10th March to 7th May 2020                         | 423             | Any                      |                             |                     |                |                            |          |         |
| de Joode et al          | The Netherlands           | Multi-centre, retrospective             | 27 <sup>th</sup> March to 4 <sup>th</sup> May 2020 | 351             | Any                      |                             |                     |                |                            |          |         |
| Miyashita et al         | USA                       | Single centre, retrospective            | 1st March to 6th April 2020                        | 334             | Any                      |                             |                     |                |                            |          |         |
| Graeselli et al         | Italy                     | Multi-centre, retrospective             | 20th February to 22nd April 2020                   | 331             | Any                      |                             |                     |                |                            |          |         |
| Lunski et al            | USA                       | Multi centre, retrospective             | 1st March to 30th April 2020                       | 312             | Any                      |                             |                     |                |                            |          |         |
| Jee et al               | USA                       | Single centre, retrospective            | 8th March to 31st March 2020                       | 309             | Any                      |                             |                     |                |                            |          |         |
| Song et al              | China                     | Multi centre, 33 centres, retrospective | 1st January to 25th March 2020                     | 248             | Any                      |                             |                     |                |                            |          |         |
| COVIDSurg Collaborative | 24 countries <sup>3</sup> | Multi centre, prospective               | 1st January to 31st March 2020                     | 239             | Any                      |                             |                     |                |                            |          |         |
| Tian et al              | China                     | Multi-centre, retrospective             | 13th January to 18th March 2020                    | 232             | Any                      |                             |                     |                |                            |          |         |
| Di Cosimo et al         | Italy                     | Multi centre, 26 centres, retrospective | 15th May to 30th September 2020                    | 231             | Any                      |                             |                     |                |                            |          |         |

| Publication          | Country                            | Study type                              | Time period                      | Cancer patients | Cancer type     | Cancer vs non cancer cohort | Presenting symptoms | Co-morbidities | Impact of cancer treatment | Severity | Outcome |
|----------------------|------------------------------------|-----------------------------------------|----------------------------------|-----------------|-----------------|-----------------------------|---------------------|----------------|----------------------------|----------|---------|
| Mehta V et al        | USA                                | Single centre, retrospective            | 18th March to 8th April 2020     | 218             | Any             |                             |                     |                |                            |          |         |
| Yang K et al         | China                              | Multi-centre, retrospective             | 13th January to 18th March 2020  | 205             | Any             |                             |                     |                |                            |          |         |
| Ferrari et al        | Brazil                             | Multi centre, prospective               | 29th March to 4th July 2020      | 198             | Any             |                             |                     |                |                            |          |         |
| Garassino et al      | Multicentre <sup>4</sup>           | Multi-centre longitudinal, prospective  | 26th March to 12th April 2020    | 198             | Thoracic cancer |                             |                     |                |                            |          |         |
| Mato et al           | Multicentre <sup>5</sup>           | Multi-centre, 43 centres, retrospective | 17th February to 30th April 2020 | 198             | CLL             |                             |                     |                |                            |          |         |
| Scarfo et al         | International centres <sup>6</sup> | Multi-centre, retrospective             | 28th March to 22nd May 2020      | 190             | CLL             |                             |                     |                |                            |          |         |
| Mehta A et al        | India                              | Single centre, retrospective            | 8th June to 20th August 2020     | 186             | Any             |                             |                     |                |                            |          |         |
| de Melo et al        | Brazil                             | Single centre, retrospective            | 30th April to 26th May 2020      | 181             | Any             |                             |                     |                |                            |          |         |
| Albiges et al        | France                             | Single centre, retrospective            | 24th March to 29th April 2020    | 178             | Any             |                             |                     |                |                            |          |         |
| Martinez-Lopez et al | Spain                              | Multi-centre, 73 centres, retrospective | 1st March to 30th April 2020     | 167             | Myeloma         |                             |                     |                |                            |          |         |
| Russell et al        | United Kingdom                     | Single centre, retrospective            | 29th February to 12th May 2020   | 156             | Any             |                             |                     |                |                            |          |         |
| Basse et al          | France                             | Single centre, prospective              | 13th March to 25th April 2020    | 141             | Any             |                             |                     |                |                            |          |         |

| Publication      | Country        | Study type                             | Time period                                        | Cancer patients | Cancer type                          | Cancer vs non cancer cohort | Presenting symptoms | Co-morbidities | Impact of cancer treatment | Severity | Outcome |
|------------------|----------------|----------------------------------------|----------------------------------------------------|-----------------|--------------------------------------|-----------------------------|---------------------|----------------|----------------------------|----------|---------|
| Lara et al       | USA            | Multi centre, retrospective            | 1st March to 22nd April 2020                       | 121             | Gynaecological cancer                |                             |                     |                |                            |          |         |
| Brar et al       | USA            | Single centre, retrospective           | 3 <sup>rd</sup> March to 15 <sup>th</sup> May 2020 | 117             | Any                                  |                             |                     |                |                            |          |         |
| Angelis et al    | United Kingdom | Single centre, prospective             | 1st March to 30th April 2020                       | 113             | Any                                  |                             |                     |                |                            |          |         |
| Gupta et al      | USA            | Multi centre, 65 centres, prospective  | 4th March to 4th April 2002                        | 112             | Any                                  |                             |                     |                |                            |          |         |
| Meng et al       | China          | Single centre, retrospective           | 18th January to 27th March 2020                    | 109             | Any                                  |                             |                     |                |                            |          |         |
| Deng et al       | China          | Multi-centre, retrospective            | Up to 11th February 2020                           | 107             | Any                                  |                             |                     |                |                            |          |         |
| Kabarriti et al  | USA            | Single centre, retrospective           | 14th March to 15th April 2020                      | 107             | Any (all prior radiotherapy to lung) |                             |                     |                |                            |          |         |
| Zhang H et al    | China          | Multi centre, 5 centres, retrospective | 5th January to 18th March 2020                     | 107             | Any                                  |                             |                     |                |                            |          |         |
| Dai et al        | China          | Multi-centre, retrospective            | 1st January to 24th February 2020                  | 105             | Any                                  |                             |                     |                |                            |          |         |
| Luo et al        | USA            | Single centre, retrospective           | 12th March to 6th May 2020                         | 102             | Lung cancer                          |                             |                     |                |                            |          |         |
| Cattaneo et al   | Italy          | Multi centre, retrospective            | 1st March to 31st March 2020                       | 102             | Haematological malignancies          |                             |                     |                |                            |          |         |
| Hultcrantz et al | USA            | Multi-centre, 5 centres, retrospective | 1st March to 30th April 2020                       | 100             | Multiple myeloma                     |                             |                     |                |                            |          |         |

| Publication    | Country        | Study type                   | Time period                                         | Cancer patients | Cancer type                 | Cancer vs non cancer cohort | Presenting symptoms | Co-morbidities | Impact of cancer treatment | Severity | Outcome |
|----------------|----------------|------------------------------|-----------------------------------------------------|-----------------|-----------------------------|-----------------------------|---------------------|----------------|----------------------------|----------|---------|
| Singh et al    | USA            | Single centre, retrospective | 10th March to 17th April 2020                       | 85              | Any                         |                             |                     |                |                            |          |         |
| Shah et al     | United Kingdom | Multi-centre, retrospective  | 13 <sup>th</sup> March to 5 <sup>th</sup> May 2020  | 80              | Haematological malignancies |                             |                     |                |                            |          |         |
| Cook et al     | United Kingdom | Multicentre, prospective     | Up to 18th May 2020                                 | 75              | Multiple myeloma            |                             |                     |                |                            |          |         |
| Erdal et al    | Turkey         | Single centre, retrospective | 15 <sup>th</sup> March to 15 <sup>th</sup> May 2020 | 71              | Any                         |                             |                     |                |                            |          |         |
| Sun et al      | USA            | Multi-centre, retrospective  | Up to June 2020                                     | 67              | Any                         |                             |                     |                |                            |          |         |
| Booth et al    | United Kingdom | Multi centre, prospective    | 1st March to 6th May 2020                           | 66              | Haematological malignancies |                             |                     |                |                            |          |         |
| Yarza et al    | Spain          | Single centre, prospective   | 9th March to 19th April 2020                        | 63              | Any                         |                             |                     |                |                            |          |         |
| Vuagnat et al  | France         | Single centre, prospective   | 13th March to 25th April 2020                       | 59              | Breast cancer               |                             |                     |                |                            |          |         |
| Wang B et al   | USA            | Single centre, retrospective | 1st March to 30th April 2020                        | 58              | Multiple myeloma            |                             |                     |                |                            |          |         |
| Assaad et al   | France         | Multi-centre, prospective    | 1st March to 25th April 2020                        | 55              | Any                         |                             |                     |                |                            |          |         |
| Fox et al      | United Kingdom | Single centre, retrospective | 20th March to 20th April 2020                       | 55              | Haematological malignancies |                             |                     |                |                            |          |         |
| Yang F et al   | China          | Retrospective study          | 1st January to 15th April 2020                      | 52              | Any                         |                             |                     |                |                            |          |         |
| Suleyman et al | USA            | Multi centre, retrospective  | 9th March to 27th March 2020                        | 49              | Any                         |                             |                     |                |                            |          |         |



| Publication             | Country        | Study type                            | Time period                        | Cancer patients | Cancer type                 | Cancer vs non cancer cohort | Presenting symptoms | Co-morbidities | Impact of cancer treatment | Severity | Outcome |
|-------------------------|----------------|---------------------------------------|------------------------------------|-----------------|-----------------------------|-----------------------------|---------------------|----------------|----------------------------|----------|---------|
| Rogado et al            | Spain          | Single centre, retrospective          | 1st February to 7th April 2020     | 45              | Any                         |                             |                     |                |                            |          |         |
| Sanchez-Pina et al      | Spain          | Single centre, retrospective          | 7th March to 7th April 2020        | 39              | Haematological malignancies |                             |                     |                |                            |          |         |
| Ma et al                | China          | Single centre, retrospective          | 1st January to 30th March 2020     | 37              | Any                         |                             |                     |                |                            |          |         |
| Aries et al             | United Kingdom | Single centre, retrospective          | 11th March to 11th May 2020        | 35              | Haematological malignancies |                             |                     |                |                            |          |         |
| Martin-Moro et al       | Spain          | Single centre, retrospective          | 9th March to 17th April 2020       | 34              | Haematological malignancies |                             |                     |                |                            |          |         |
| Joharathnam-Hogan et al | United Kingdom | Multi centre, 4 centres retrospective | 12th March to 7th April 2020       | 30              | Any                         |                             |                     |                |                            |          |         |
| Zhang L et al           | China          | Multi-centre, retrospective           | 13th January to 26th February 2020 | 28              | Any                         |                             |                     |                |                            |          |         |
| Kalinsky et al          | USA            | Single centre, retrospective          | 10th March to 29th April 2020      | 27              | Breast cancer               |                             |                     |                |                            |          |         |
| Malard et al            | France         | Single centre, prospective            | 9th March to 4th April 2020        | 25              | Haematological malignancies |                             |                     |                |                            |          |         |
| Stroppa et al           | Italy          | Single centre, retrospective          | 21st February to 18th March 2020   | 25              | Any                         |                             |                     |                |                            |          |         |
| Ciceri et al            | Italy          | Single centre, prospective            | 25th February to 24th March 2020   | 22              | Any                         |                             |                     |                |                            |          |         |
| Tomlins et al           | United Kingdom | Single centre, retrospective          | 10th March to 30th March 2020      | 20              | Any                         |                             |                     |                |                            |          |         |

| Publication       | Country | Study type                                 | Time period                         | Cancer patients | Cancer type                 | Cancer vs non cancer cohort | Presenting symptoms | Co-morbidities | Impact of cancer treatment | Severity | Outcome |
|-------------------|---------|--------------------------------------------|-------------------------------------|-----------------|-----------------------------|-----------------------------|---------------------|----------------|----------------------------|----------|---------|
| Bogani et al      | Italy   | Single centre, retrospective               | February to March 2020              | 19              | Gynaecological cancer       |                             |                     |                |                            |          |         |
| Liang et al       | China   | Multi-centre, prospective                  | 31st January 2020                   | 18              | Any                         |                             |                     |                |                            |          |         |
| Guan et al        | China   | Multi centre, 575 hospitals, retrospective | 11th December to 31st January 2020  | 18              | Any                         |                             |                     |                |                            |          |         |
| Tagliamento et al | Italy   | Single centre, prospective                 | 10th March to 6th April 2020        | 17              | Any                         |                             |                     |                |                            |          |         |
| Wang L et al      | China   | Single centre, retrospective               | 1st January to 6th February 2020    | 15              | Any                         |                             |                     |                |                            |          |         |
| He et al          | China   | Multi centre, retrospective                | 23rd January to 14th February 2020  | 13              | Haematological malignancies |                             |                     |                |                            |          |         |
| Lattenist et al   | Belgium | Single centre, retrospective               | 13th March to 15th May 2020         | 13              | Haematological malignancies |                             |                     |                |                            |          |         |
| Yu et al          | China   | Single centre, retrospective               | 30th December to 17th February 2020 | 12              | Any                         |                             |                     |                |                            |          |         |
| Wu et al          | China   | Multi centre, 2 centres retrospective      | 9th January to 20th March 2020      | 11              | Any                         |                             |                     |                |                            |          |         |

**eTable 4** Overview of studies included in review.

CCC-19, COVID-19 and Cancer Consortium; CLL, chronic lymphocytic leukaemia. \* Largest and most up to date study included in review. Shaded box indicates inclusion of factor. <sup>1</sup> USA (n=4,739), outside USA (n=227); <sup>2</sup> Italy (n=343), Spain (n=323), United Kingdom (n=218), Germany (n=6); <sup>3</sup> UK, Italy, Spain, USA, France, Ireland, Portugal, Egypt, Turkey, Belgium, Greece, Switzerland, Germany, The Netherlands, Libya, Croatia, Algeria, Azerbaijan, Denmark, Israel, Jordan, Mexico, Pakistan, Sudan; <sup>4</sup> Italy, Spain, France, Switzerland, The Netherlands, USA, United Kingdom, China; <sup>5</sup> USA, Spain, United Kingdom, Other European, Unknown.

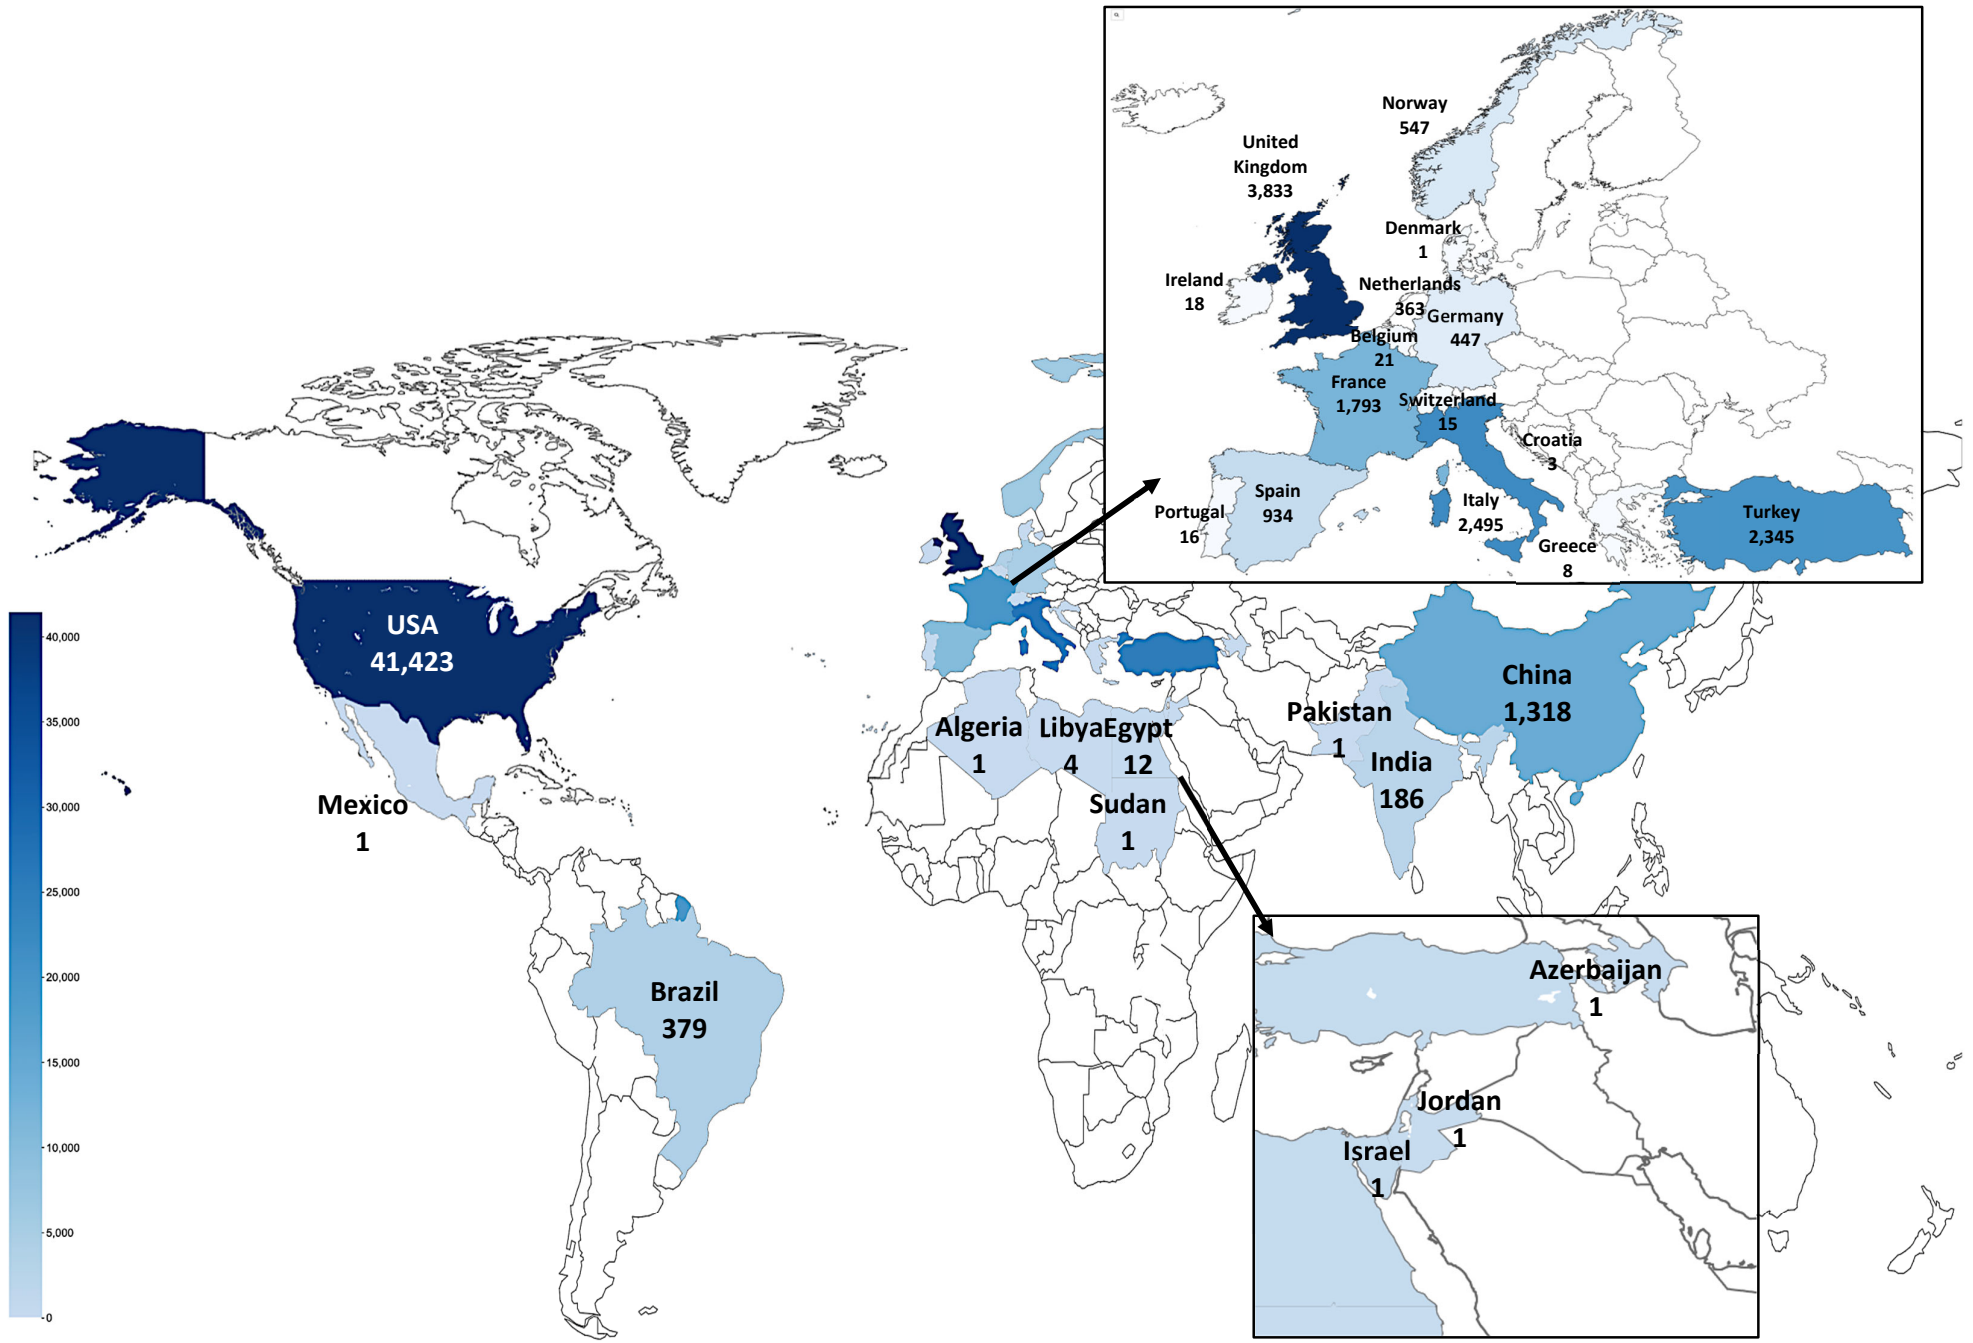

eFigure 5. Distribution of Cancer Patients Across 80 Studies

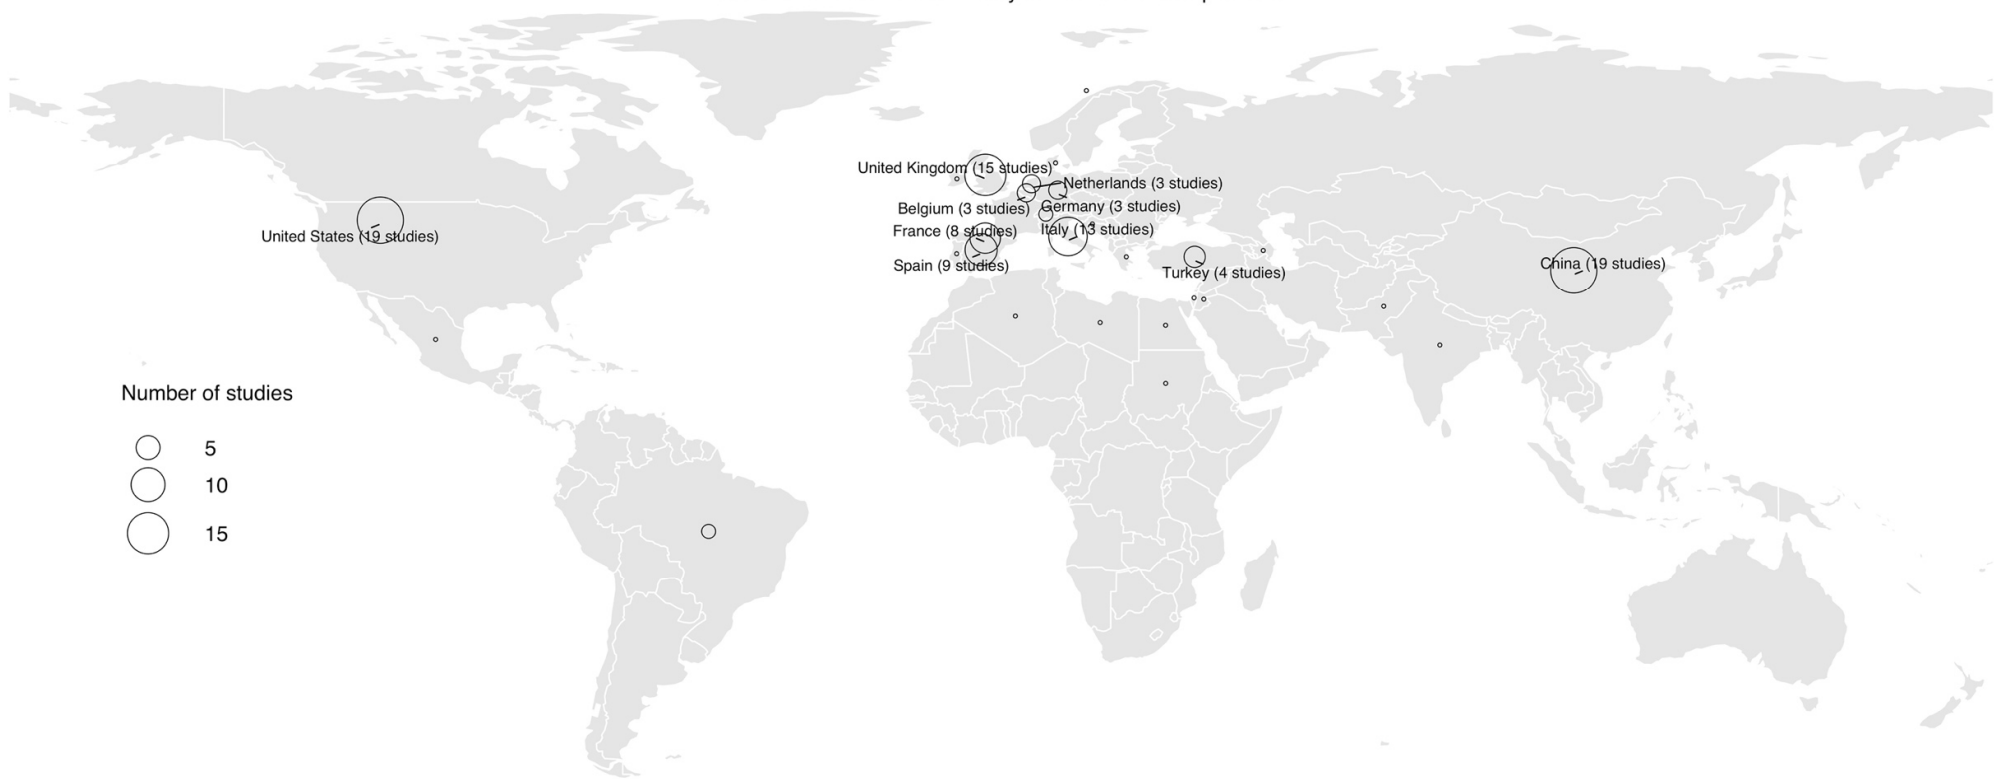

**eFigure 6** Countries included across all studies.

| Country         | Number of patients |
|-----------------|--------------------|
| USA             | 41,423             |
| United Kingdom  | 3,833              |
| Italy           | 2,495              |
| France          | 1,793              |
| Turkey          | 2,345              |
| China           | 1,318              |
| Spain           | 934                |
| Norway          | 547                |
| Germany         | 447                |
| Brazil          | 379                |
| The Netherlands | 363                |
| India           | 186                |
| Belgium         | 21                 |
| Ireland         | 18                 |
| Portugal        | 16                 |
| Switzerland     | 15                 |
| Egypt           | 12                 |
| Greece          | 8                  |
| Libya           | 4                  |
| Croatia         | 3                  |
| Algeria         | 11                 |
| Azerbaijan      | 1                  |
| Denmark         | 1                  |
| Israel          | 1                  |
| Jordan          | 1                  |
| Mexico          | 1                  |
| Pakistan        | 1                  |
| Sudan           | 1                  |
| <b>Total</b>    | <b>56,168</b>      |

eTable 5. Distribution of Cancer Patients by County

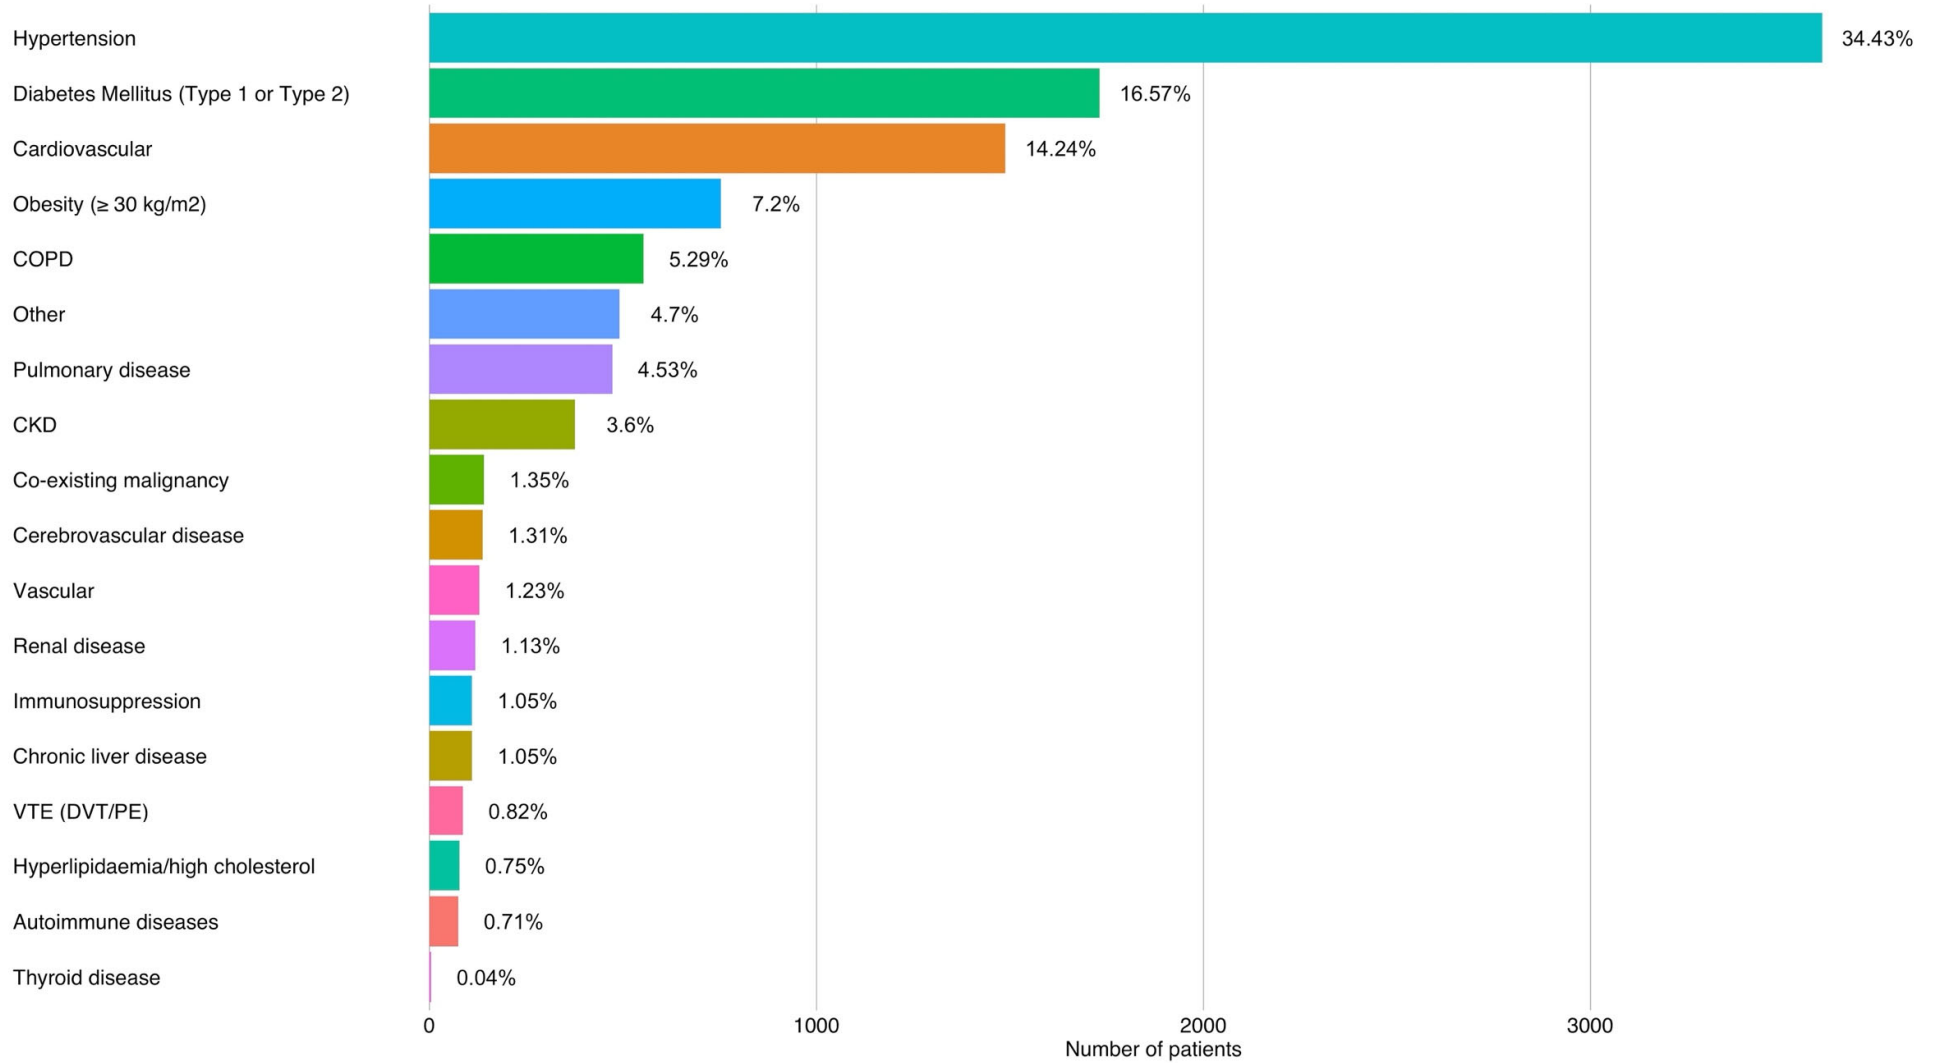

**eFigure 7.** Co-morbidities Experienced by Cancer Patients, Representing 21,697 Patients Across 56 Studies

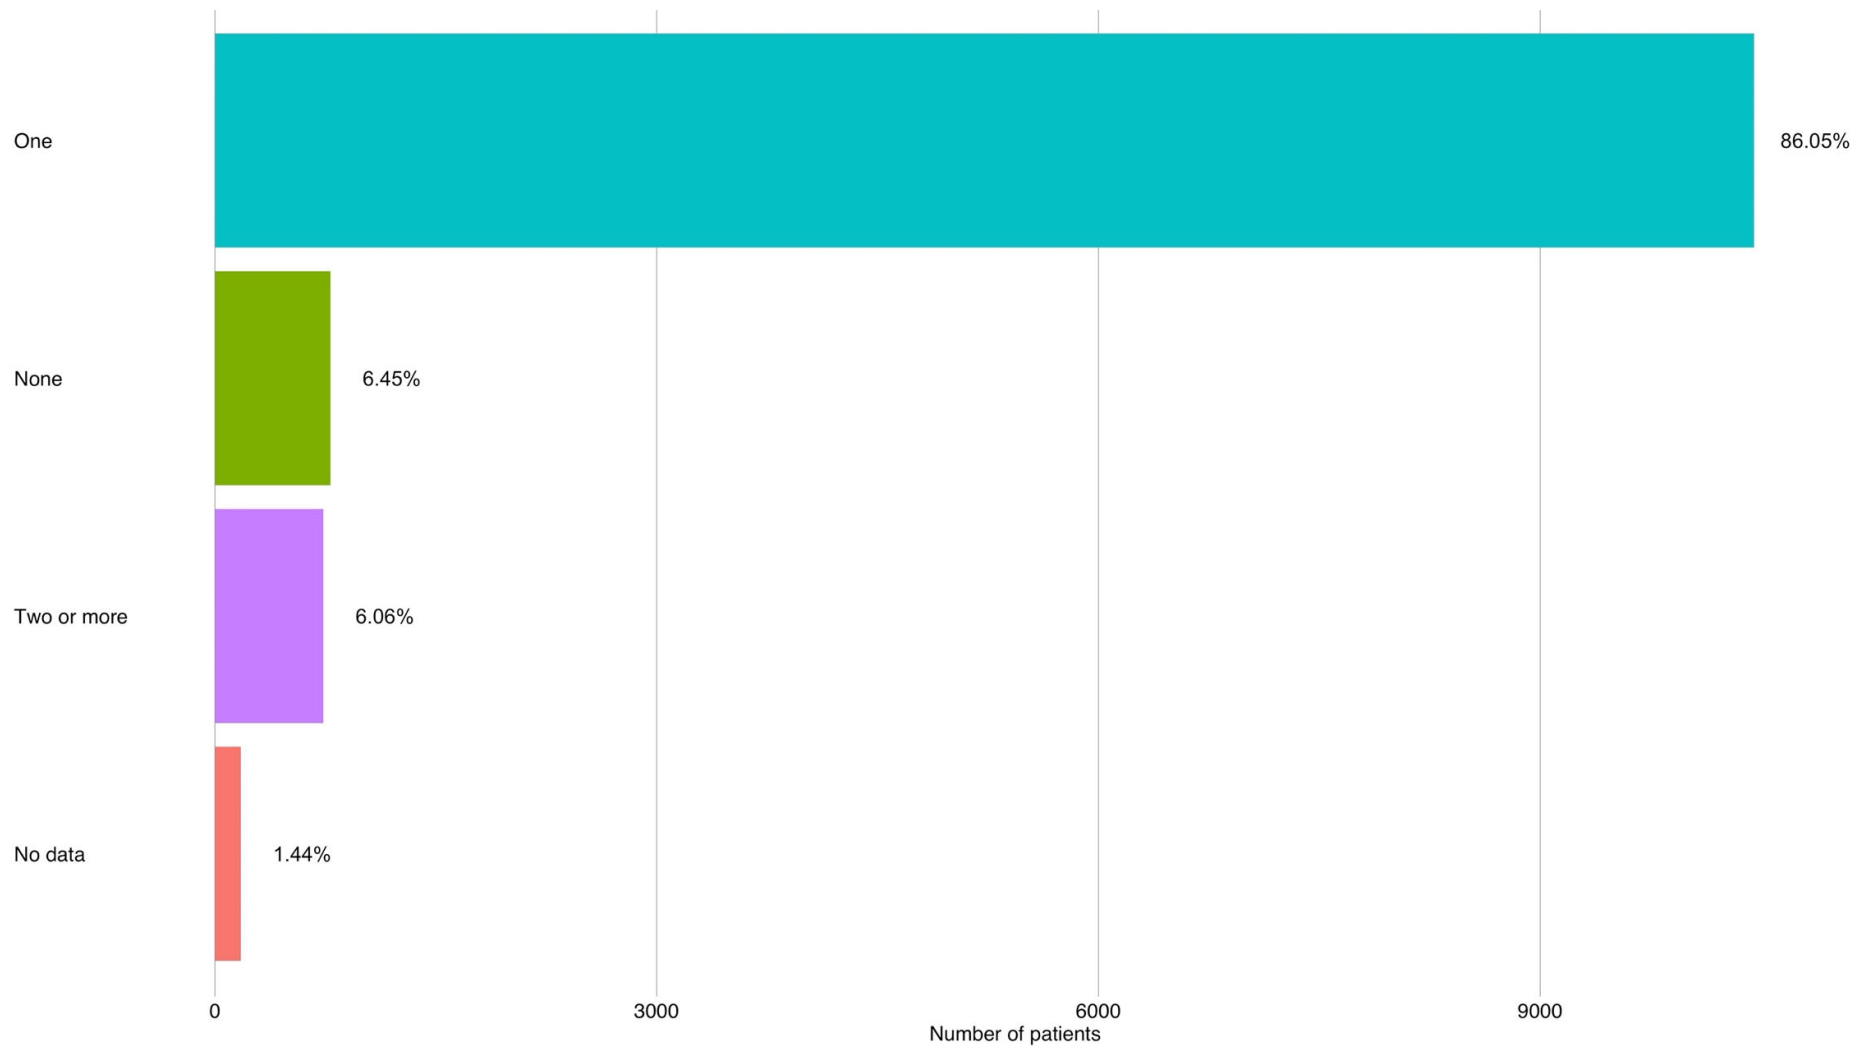

**eFigure 8.** Percentage of Cancer Patients Without Co-morbidities, or With One or More Co-morbidities, Where Reported

|                      | Hypertension | Diabetes Mellitus (Type 1 or Type 2) | Cardiovascular | COPD     | Obesity (≥ 30 kg/m <sup>2</sup> ) | Pulmonary disease | CKD     | Vascular | Cerebrovascular disease | Renal disease | Immunosuppression | Chronic liver disease <sup>1</sup> | VTE (DVT/PE) | Co-existing malignancy | Hyperlipidaemia/high cholesterol | Autoimmune diseases | Thyroid disease | Other <sup>2</sup> | None     | No data  | ≥ 2 comorbidities | Total number of patients in study |
|----------------------|--------------|--------------------------------------|----------------|----------|-----------------------------------|-------------------|---------|----------|-------------------------|---------------|-------------------|------------------------------------|--------------|------------------------|----------------------------------|---------------------|-----------------|--------------------|----------|----------|-------------------|-----------------------------------|
| Grivas et al         |              | 1385                                 | 1582           |          |                                   | 1091              | 831     |          |                         |               |                   |                                    |              |                        |                                  |                     |                 |                    |          |          |                   | 4,966                             |
| Özdemir et al        | 391 (26)     | 194 (13)                             |                | 106 (7)  |                                   |                   | 72 (5)  |          | 69 (5)                  |               |                   | 32 (2)                             |              |                        |                                  |                     |                 |                    | 528 (35) | 297 (20) |                   | 1,523                             |
| Lievre et al         | 529 (46)     | 241 (21)                             | 194 (16)       | 124 (12) | 183 (16)                          |                   |         |          |                         |               |                   |                                    |              |                        |                                  |                     |                 |                    |          |          |                   | 1,289                             |
| Lee et al            | 343 (33)     | 178 (17)                             | 145 (14)       | 80 (8)   |                                   |                   |         |          |                         |               |                   |                                    |              |                        |                                  |                     |                 | 336 (42)           | 205 (20) | 175 (17) |                   | 1,044                             |
| Pinato et al         | 386 (43)     | 181 (20)                             | 149 (17)       |          |                                   | 119 (13)          | 77 (9)  | 38 (4)   | 54 (6)                  |               | 23 (3)            | 15 (2)                             |              |                        |                                  |                     |                 | 296 (33)           |          |          | 411 (46)          | 890                               |
| Yigenoğlu et al      | 379 (51)     | 198 (27)                             | 156 (21)       |          |                                   | 175 (24)          |         |          |                         |               |                   |                                    |              |                        |                                  |                     |                 |                    |          |          |                   | 740                               |
| Passamonti et al     | x            | 72 (13)                              | 82 (15)        |          |                                   | 43 (8)            |         | 34 (6)   | 91 (17)                 | 34 (6)        |                   | 11 (2)                             |              | 51 (10)                |                                  |                     |                 | 13 (2)             |          |          |                   | 536                               |
| Rützhich et al       | 259 (60)     | 104 (24)                             | 169 (39)       | 39 (9)   | 69 (24)                           | 42 (10)           | 87 (21) | 34 (8)   | 59 (14)                 | 25 (8)        | 5 (1)             | 11 (3)                             |              |                        |                                  |                     |                 | 37 (9)             |          |          |                   | 435                               |
| Robilotti et al      | 214 (51)     | 84 (20)                              | 84 (20)        | 36 (9)   | 129 (30)                          | 43 (10)           | 29 (7)  |          |                         |               |                   |                                    |              |                        |                                  |                     |                 |                    |          |          |                   | 423                               |
| de Joodde et al      |              | 55 (16)                              | 190 (54)       | 46 (13)  | 64 (18)                           |                   |         |          |                         |               |                   |                                    |              | 63 (18)                |                                  | 22 (6)              |                 |                    |          |          |                   | 351                               |
| Lunski et al         | 246 (79)     | 116 (37)                             | 34 (11)        | 35 (11)  | 143 (46)                          |                   | 80 (26) |          |                         |               |                   | 10 (3)                             |              |                        |                                  |                     |                 |                    |          |          |                   | 312                               |
| Jee et al            | 120 (39)     |                                      |                | 16 (5)   | 92 (30)                           |                   |         |          |                         |               |                   | 36 (12)                            |              |                        |                                  |                     |                 |                    |          |          |                   | 309                               |
| Song et al           | 83 (33)      | 38 (15)                              | 28 (11)        | 21 (8)   |                                   |                   |         |          | 18 (7)                  |               |                   |                                    |              |                        |                                  |                     |                 |                    |          |          |                   | 248                               |
| Tian et al           | 96 (41)      | 55 (24)                              | 22 (9)         | 3 (1)    |                                   |                   | 6 (3)   |          |                         | 6 (3)         |                   |                                    | 9 (4)        |                        |                                  |                     |                 |                    |          |          |                   | 232                               |
| Di Cosimo et al      | 97 (42)      | 43 (19)                              | 36 (16)        |          |                                   | 19 (8)            |         |          |                         |               |                   |                                    |              |                        |                                  |                     |                 | 25 (11)            | 82 (36)  | 1 (0)    | 52 (23)           | 231                               |
| Mehta V et al        | 147 (67)     | 80 (37)                              | 66 (30)        |          |                                   | 62 (28)           | 54 (25) |          |                         |               |                   |                                    |              |                        |                                  |                     |                 |                    |          |          |                   | 218                               |
| Yang K et al         | 67 (33)      | 22 (11)                              | 16 (8)         | 5 (2)    |                                   |                   | 4 (2)   |          |                         | 13 (6)        |                   |                                    |              |                        |                                  |                     |                 |                    | 99 (48)  |          |                   | 205                               |
| Ferrari et al        | 90 (45)      | 44 (22)                              | 23 (12)        |          |                                   |                   |         |          |                         |               |                   |                                    |              |                        |                                  |                     |                 |                    |          |          |                   | 198                               |
| Garassino et al      | 93 (47)      | 29 (15)                              | 40 (20)        | 51 (26)  |                                   |                   | 15 (8)  |          |                         | 16 (8)        |                   |                                    |              |                        | 6 (3)                            |                     |                 | 96 (47)            | 32 (16)  |          | 106 (54)          | 198                               |
| Mato et al           | 101 (51)     | 40 (20)                              | 39 (20)        | 22 (11)  |                                   | 12 (6)            |         | 34 (17)  |                         |               | 78 (44)           |                                    | 25 (13)      |                        | 20 (10)                          |                     |                 |                    |          |          |                   | 198                               |
| Scarfo et al         | 78 (54)      | 35 (24)                              | 42 (29)        | 9 (6)    |                                   | 21 (14)           |         |          |                         |               |                   |                                    |              | 18 (12)                |                                  |                     |                 |                    | 45 (24)  |          | 102 (54)          | 190                               |
| Mehta A et al        | 45 (24)      | 34 (18)                              | 11 (6)         | 2 (1)    |                                   |                   |         |          |                         |               |                   |                                    |              |                        |                                  |                     | 30 (16)         | 5 (3)              | 100 (54) | 39 (21)  |                   | 186                               |
| de Melo et al        | 77 (43)      | 31 (17)                              |                |          |                                   | 7 (4)             |         |          |                         | 10 (6)        |                   |                                    |              |                        |                                  |                     |                 |                    |          |          |                   | 181                               |
| Albiges et al        | 65 (37)      | 35 (20)                              | 21 (12)        |          | 25 (14)                           |                   | 10 (6)  |          |                         |               |                   |                                    |              | 16 (9)                 | 9 (5)                            |                     |                 |                    |          |          |                   | 178                               |
| Martinez-Lopez et al | 67 (40)      | 28 (17)                              | 35 (21)        |          |                                   | 23 (14)           |         | 32 (19)  |                         |               |                   |                                    |              |                        |                                  |                     |                 |                    |          |          | 41 (25)           | 167                               |
| Russell et al        | 74 (47)      | 35 (22)                              | 29 (19)        |          |                                   | 25 (16)           | 30 (19) |          |                         | 3 (2)         | 4 (3)             |                                    |              |                        |                                  |                     |                 | 10 (6)             | 43 (28)  |          | 65 (42)           | 156                               |
| Basse et al          | 48 (34)      | 24 (17)                              | 21 (15)        |          |                                   | 7 (5)             |         |          |                         |               |                   |                                    |              |                        |                                  |                     |                 | 6 (4)              | 88 (62)  |          |                   | 141                               |
| Lara et al           | 69 (57)      | 38 (31)                              | 8 (7)          | 4 (3)    |                                   | 10 (8)            | 9 (7)   |          |                         |               |                   |                                    |              | 8 (7)                  | 12 (10)                          |                     |                 |                    | 8 (7)    |          |                   | 121                               |
| Brar et al           | 62 (53)      | 38 (33)                              | 35 (30)        | 9 (8)    | 28 (24)                           | 6 (5)             | 3 (3)   |          |                         |               |                   |                                    |              |                        |                                  |                     |                 |                    |          |          |                   | 117                               |
| Angelis et al        | 39 (35)      | 18 (16)                              | 13 (12)        | 6 (5)    |                                   |                   |         |          |                         |               |                   |                                    |              |                        |                                  |                     |                 | 11 (10)            | 27 (24)  |          |                   | 113                               |
| Meng et al           | 30 (28)      | 11 (10)                              | 11 (10)        |          |                                   |                   |         |          |                         |               |                   |                                    |              |                        |                                  |                     |                 | 2 (2)              |          |          |                   | 109                               |
| Zhang H et al        | 52 (49)      | 22 (21)                              | 14 (13)        | 5 (5)    |                                   |                   |         |          |                         |               |                   |                                    |              |                        | 4 (4)                            |                     |                 |                    | 35 (33)  |          |                   | 107                               |
| Dai et al            | 30 (29)      | 7 (7)                                | 12 (11)        |          |                                   |                   | 6 (6)   |          |                         | 7 (7)         |                   |                                    | 5 (5)        |                        |                                  |                     |                 |                    |          |          |                   | 105                               |
| Luo et al            | 57 (56)      | 27 (27)                              | 7 (7)          | 24 (24)  | 30 (29)                           | 28 (27)           |         |          |                         |               |                   | 18 (18)                            |              |                        |                                  |                     |                 |                    |          |          |                   | 102                               |
| Hultcrantz et al     | 55 (55)      | 18 (18)                              | 23 (23)        | 1 (1)    |                                   | 2 (2)             | 3 (3)   |          |                         |               |                   |                                    | 3 (3)        |                        | 20 (20)                          |                     |                 | 3 (3)              | 28 (28)  |          | 37 (37)           | 100                               |
| Shah et al           | 21 (50)      | 9 (21)                               | 5 (12)         | 3 (7)    |                                   | 5 (12)            |         |          |                         |               |                   |                                    |              |                        |                                  |                     |                 |                    |          |          |                   | 80                                |



|                         |         |         |         |         |         |         |         |        |       |     |       |        |         |         |       |    |        |         |         |         |     |        |
|-------------------------|---------|---------|---------|---------|---------|---------|---------|--------|-------|-----|-------|--------|---------|---------|-------|----|--------|---------|---------|---------|-----|--------|
| Cook et al              | 31 (41) |         |         |         |         |         |         |        |       |     |       |        |         |         |       |    |        |         |         |         |     | 75     |
| Erdal et al             | 34 (48) | 25 (35) | 6 (9)   | 20 (28) |         |         | 7 (10)  |        | 6 (9) |     |       |        |         |         |       |    |        |         |         |         |     | 71     |
| Sun et al               | 38 (57) | 22 (33) | 11 (16) |         | 12 (18) | 14 (21) |         |        | 3 (5) |     | 5 (8) |        |         |         |       |    |        | 8 (12)  |         |         |     | 67     |
| Yarza et al             | 33 (52) | 11 (17) | 12 (19) |         |         | 14 (22) | 5 (8)   |        |       |     |       |        | 13 (21) |         |       |    |        |         |         |         |     | 63     |
| Vuagnat et al           | 21 (36) | 10 (17) | 8 (5)   |         | 10 (17) | 2 (3)   |         |        |       |     |       |        |         |         |       |    |        | 3 (5)   | 39 (51) |         |     | 59     |
| Wang B et al            | 37 (64) | 16 (28) | 39 (67) |         | 22 (37) | 12 (21) | 14 (24) |        |       |     |       |        |         | 36 (62) |       |    |        | 18 (31) |         |         |     | 58     |
| Fox et al               | 20 (37) | 11 (20) | 3 (6)   | 1 (2)   |         |         | 7 (13)  |        |       |     |       |        |         |         |       |    |        |         |         |         |     | 55     |
| Yang F et al            | 17 (33) | 7 (21)  | 5 (15)  | 4 (8)   |         |         | 1 (2)   |        | 3 (6) |     |       | 4 (8)  |         |         |       |    | 1 (2)  |         | 19 (37) |         |     | 52     |
| Rogado et al            | 23 (51) | 13 (29) | 4 (9)   | 13 (29) | 6 (13)  |         | 3 (7)   |        |       |     |       |        |         |         |       |    |        |         |         |         |     | 45     |
| Sanchez-Pina et al      | 19 (49) | 7 (18)  | 6 (15)  | 2 (5)   |         |         |         |        |       |     |       | 4 (10) |         |         |       |    |        |         | 17 (44) |         |     | 39     |
| Aries et al             | 10 (29) | 5 (14)  | 8 (23)  | 2 (6)   |         | 2 (6)   | 5 (14)  | 5 (14) | 1 (3) |     | 3 (9) |        | 1 (3)   |         |       |    |        | 4 (11)  |         |         |     | 35     |
| Joharatname Hogan et al | 11 (42) | 11 (42) | 6 (20)  |         |         | 7 (23)  | 1 (3)   |        |       |     |       | 1 (3)  |         | 6 (20)  | 1 (3) |    | 9 (30) | 2 (7)   |         | 15 (58) |     | 30     |
| Zhang L et al           | 4 (14)  | 4 (14)  | 3 (11)  | 1 (4)   |         |         |         |        | 2 (7) |     |       |        |         |         |       |    |        |         | 18 (64) |         |     | 28     |
| Kalinsky et al          | 15 (56) | 6 (22)  | 3 (11)  |         |         | 6 (22)  |         |        |       |     |       |        |         |         |       |    |        |         | 9 (33)  |         |     | 27     |
| Malard et al            | 17 (68) | 6 (24)  | 1 (4)   | 2 (8)   | 8 (32)  |         | 5 (20)  |        |       |     |       | 6 (24) | 5 (20)  |         |       |    |        |         | 2 (8)   |         |     | 25     |
| Stroppa et al           | 16 (64) | 8 (32)  |         | 7 (28)  |         |         |         |        |       |     |       |        |         |         |       |    |        |         | 6 (24)  |         |     | 25     |
| Bogani et al            |         |         | 5 (26)  |         |         |         | 1 (5)   |        |       |     |       |        |         |         |       |    | 3 (16) |         | 10 (53) |         |     | 19     |
| Liang et al             | 2 (11)  | 2 (11)  |         | 1 (6)   |         |         | 1 (6)   |        |       |     |       | 1 (6)  |         |         |       |    |        |         | 14 (78) |         |     | 18     |
| He et al                |         |         | 3 (23)  |         |         |         |         |        |       |     |       | 3 (23) |         |         |       |    |        |         |         |         |     | 13     |
| Lattenist et al         | 2 (15)  | 1 (8)   |         |         | 1 (8)   | 3 (23)  |         | 3 (23) |       |     |       |        |         |         |       |    |        | 4 (31)  | 5 (39)  |         |     | 13     |
| Total                   | 4,860   | 3,734   | 3,465   | 700     | 822     | 1800    | 1366    | 180    | 300   | 125 | 115   | 154    | 56      | 146     | 78    | 74 | 34     | 894     | 1,494   | 473     | 827 | 21,697 |

**eFigure 9** Summary of reported co-morbidities.

CDK, chronic kidney disease; DVT, deep venous thrombosis; PE, pulmonary embolism; VTE, venous thromboembolism.

**A**

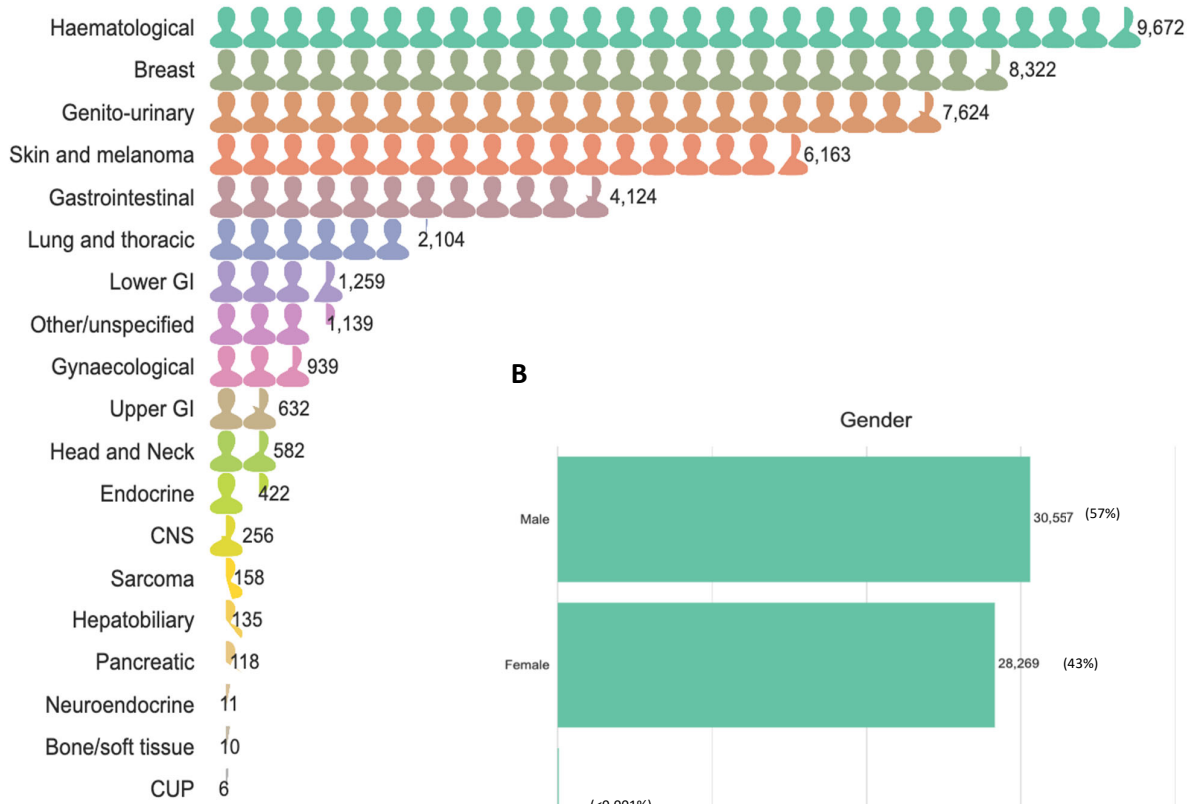

**B**

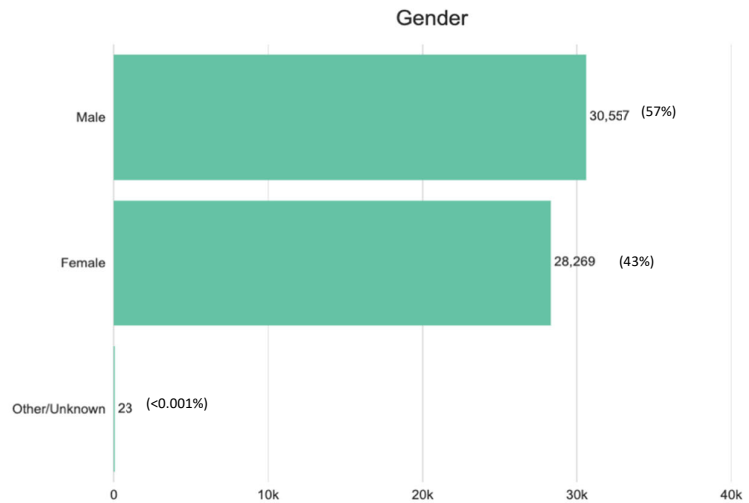

**C**

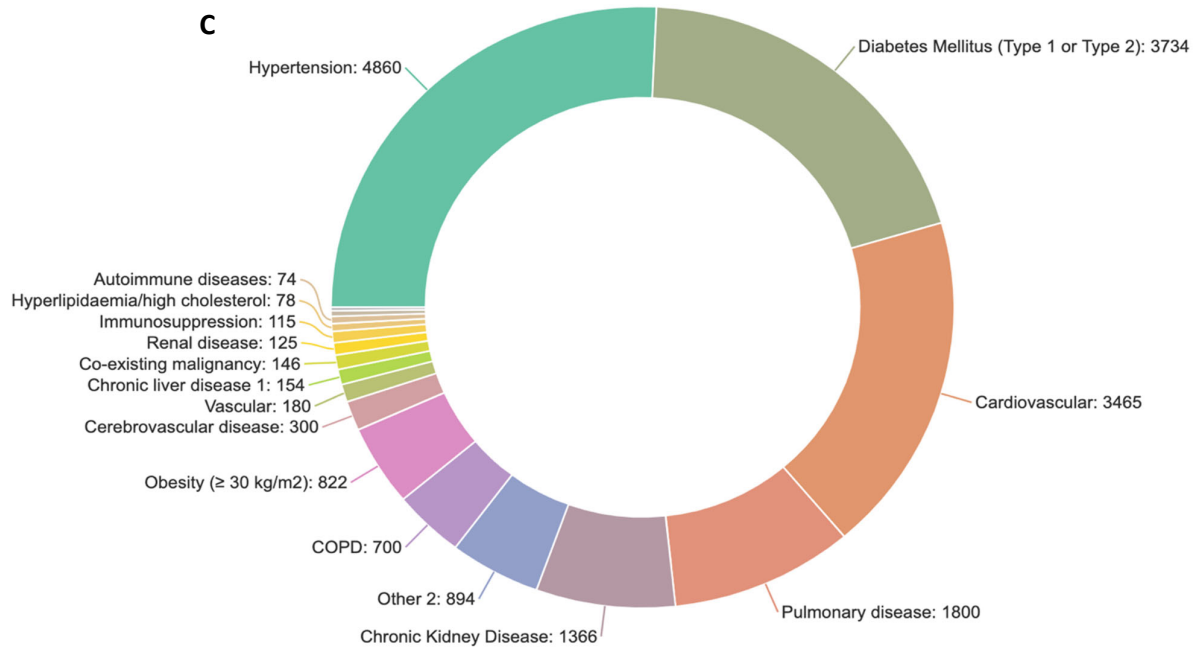

**eFigure 10** Demographic and presenting symptoms.

(A) Tumour prevalence: includes 43,676 patients from 68 studies (B) Sex distribution across studies: figure includes 58,849 patients from 70 studies. (C) Co-morbidities: figure includes 21,697 patients from 56 studies.

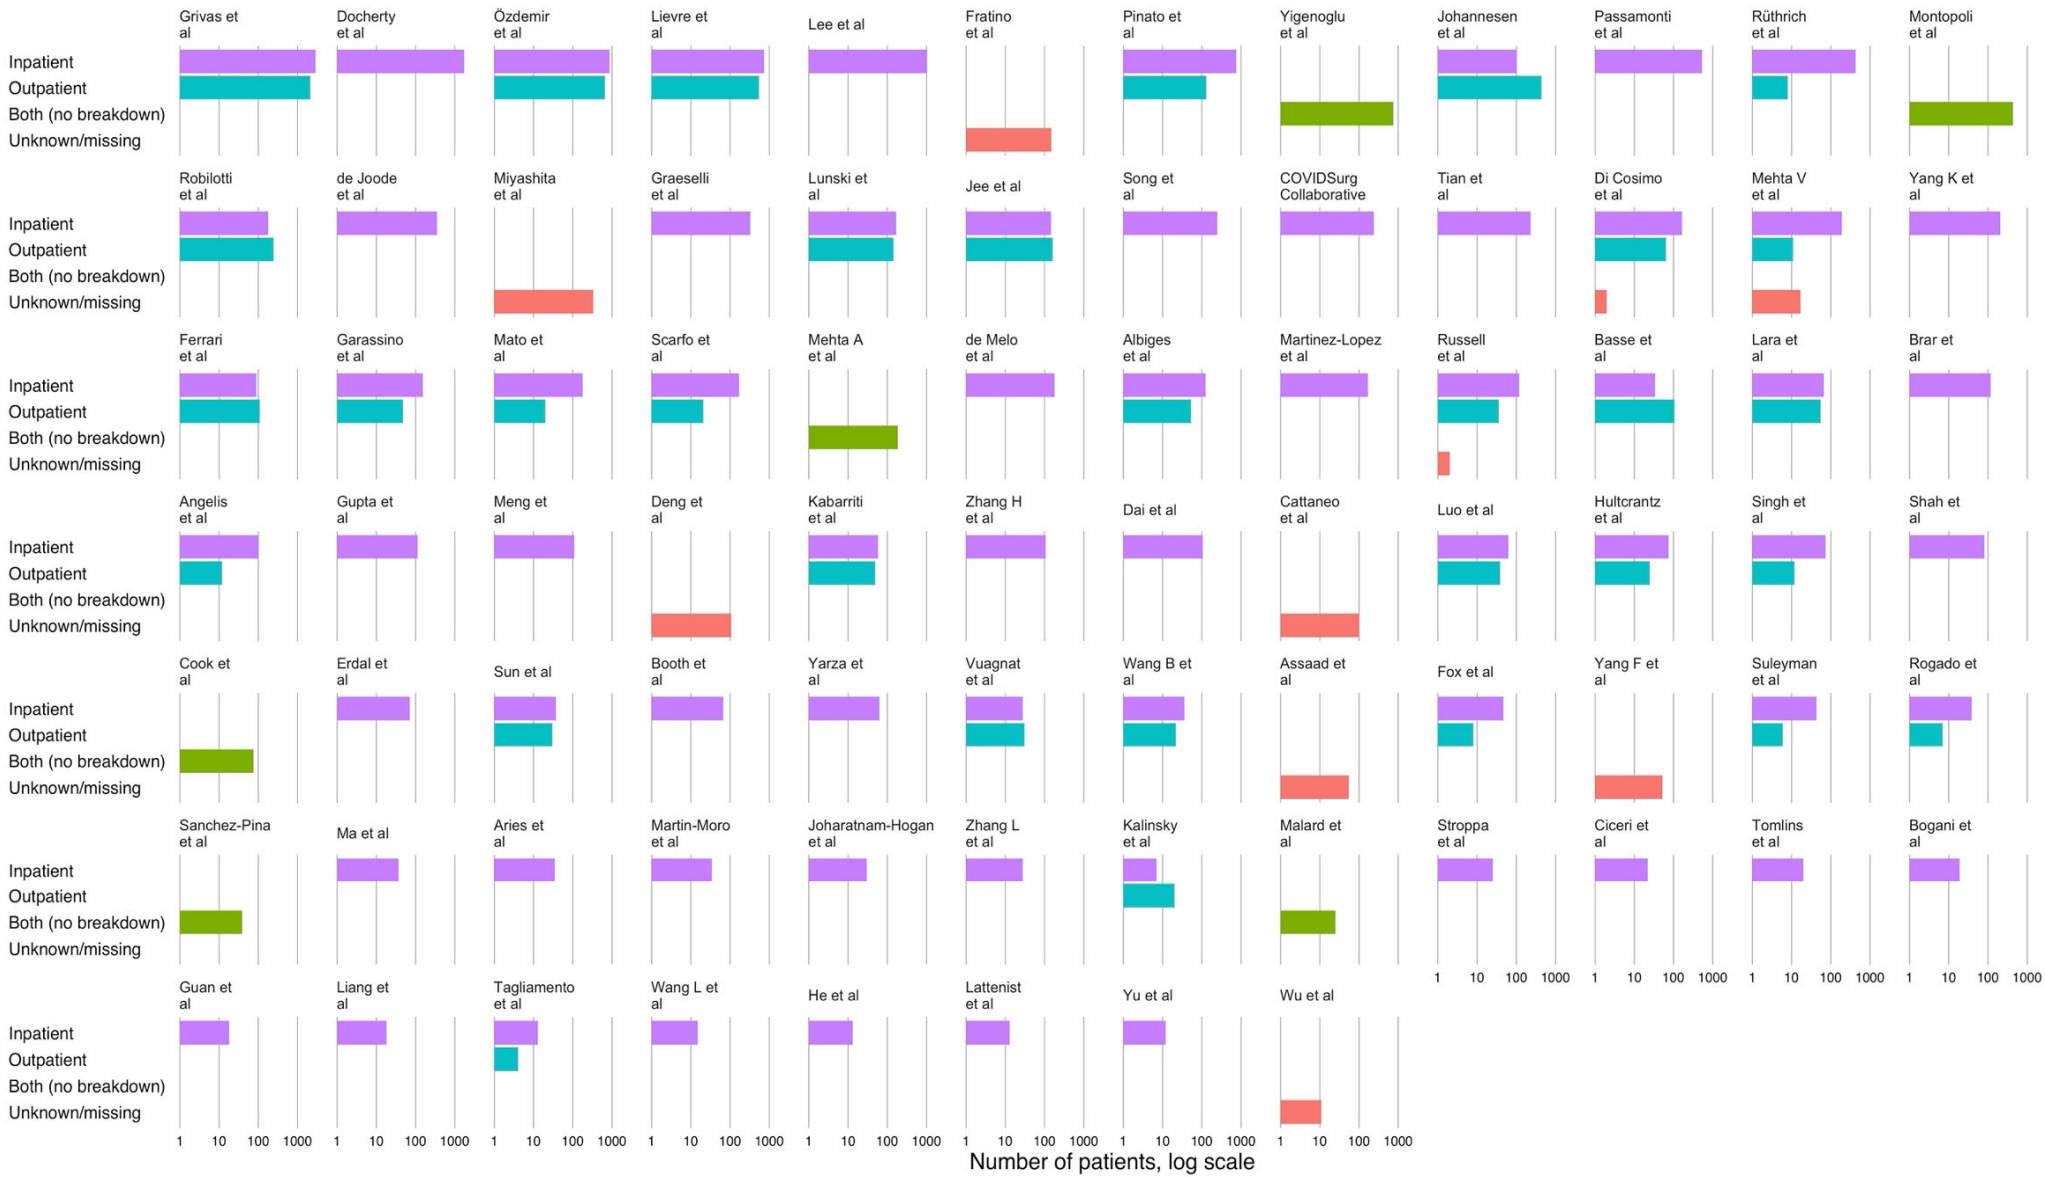

**eFigure 11.** Setting of Care Across 80 Studies, Representing 22,918 Cancer Patients

| Publication             | Total number of patients | Inpatient | Outpatient | Both (no breakdown) | Unknown/missing data | Possible nosocomial infection | Hospitalised at time of infection |
|-------------------------|--------------------------|-----------|------------|---------------------|----------------------|-------------------------------|-----------------------------------|
| Sharafeldin et al       | 38,614                   | 19,515    | 19,099     |                     |                      |                               |                                   |
| Grivas et al            | 4966                     | 2872      | 2094       |                     |                      | N                             |                                   |
| Docherty et al          | 1743                     | 1743      | -          | -                   |                      | N                             |                                   |
| Özdemir et al           | 1523                     | 862       | 661        |                     |                      |                               |                                   |
| Lievre et al            | 1289                     | 734       | 555        |                     |                      | N                             |                                   |
| Lee et al               | 1044                     | 1044      | -          | -                   |                      | N                             |                                   |
| Fratino et al           | 909                      |           |            |                     | 150                  | N                             |                                   |
| Pinato et al            | 890                      | 760       | 130        | -                   |                      | 155                           |                                   |
| Yigenoglu et al         | 740                      |           |            | 740                 |                      |                               |                                   |
| Johannesen et al        | 547                      | 104       | 443        |                     |                      |                               |                                   |
| Passamonti et al        | 536                      | 536       | -          | -                   |                      | N                             |                                   |
| Rüthrich et al          | 435                      | 427       | 8          |                     |                      |                               |                                   |
| Montopoli et al         | 430                      | -         | -          | 430                 |                      | N                             |                                   |
| Robilotti et al         | 423                      | 180       | 243        | -                   |                      | N                             |                                   |
| de Jooode et al         | 351                      | 351       | -          | -                   |                      | N                             |                                   |
| Miyashita et al         | 334                      | -         | -          | -                   | 334                  | N                             |                                   |
| Graeselli et al         | 331                      | 331       |            | -                   |                      | N                             |                                   |
| Lunski et al            | 312                      | 166       | 146        | -                   |                      | N                             |                                   |
| Jee et al               | 309                      | 147       | 162        | -                   |                      | N                             |                                   |
| Song et al              | 248                      | 248       | -          | -                   |                      | N                             |                                   |
| COVIDSurg Collaborative | 239                      | 239       | -          | -                   |                      | N                             |                                   |
| Tian et al              | 232                      | 232       | -          | -                   |                      | N                             |                                   |
| Di Cosimo et al         | 231                      | 165       | 64         |                     | 2                    |                               |                                   |
| Mehta V et al           | 218                      | 190       | 11         | -                   | 17                   | 37/61                         |                                   |
| Yang K et al            | 205                      | 205       | -          | -                   |                      | N                             |                                   |
| Ferrari et al           | 198                      | 88        | 110        |                     |                      |                               |                                   |
| Garassino et al         | 198                      | 152       | 48         | -                   |                      | 13/24                         |                                   |
| Mato et al              | 198                      | 178       | 20         | -                   |                      | N                             |                                   |
| Scarfo et al            | 190                      | 169       | 21         | -                   |                      | N                             |                                   |
| Mehta A et al           | 186                      |           |            | 186                 |                      |                               |                                   |
| de Melo et al           | 181                      | 181       | -          | -                   |                      | 83                            |                                   |
| Albiges et al           | 178                      | 125       | 53         | -                   |                      | 31                            |                                   |
| Martinez-Lopez et al    | 167                      | 167       | -          | -                   |                      | N                             |                                   |
| Russell et al           | 156                      | 118       | 36         | -                   | 2                    | N                             |                                   |

| Publication            | Total number of patients | Inpatient | Outpatient | Both (no breakdown) | Unknown/missing data | Possible nosocomial infection | Hospitalised at time of infection |
|------------------------|--------------------------|-----------|------------|---------------------|----------------------|-------------------------------|-----------------------------------|
| Basse et al            | 141                      | 34        | 107        | -                   |                      | N                             | 34                                |
| Lara et al             | 121                      | 66        | 55         | -                   |                      | N                             |                                   |
| Brar et al             | 117                      | 117       | -          | -                   |                      |                               |                                   |
| Angelis et al          | 113                      | 101       | 12         | -                   |                      | Not clear                     | 14                                |
| Gupta et al            | 112                      | 112       | -          | -                   |                      | No                            |                                   |
| Meng et al             | 109                      | 109       | -          | -                   |                      | N                             |                                   |
| Deng et al             | 107                      | -         | -          | -                   | 107                  | N                             |                                   |
| Kabarriti et al        | 107                      | 58        | 49         | -                   |                      | N                             |                                   |
| Zhang H et al          | 107                      | 107       |            | -                   |                      | N                             |                                   |
| Dai et al              | 105                      | 105       |            | -                   |                      | N                             |                                   |
| Luo et al              | 102                      | 63        | 39         | -                   |                      | N                             |                                   |
| Cattaneo et al         | 102                      | -         |            | -                   | 102                  | N                             |                                   |
| Hultcrantz et al       | 100                      | 75        | 25         | -                   |                      | N                             |                                   |
| Singh et al            | 85                       | 73        | 12         | -                   |                      | N                             |                                   |
| Shah et al             | 80                       | 80        | -          | -                   |                      |                               |                                   |
| Cook et al             | 75                       | -         | -          | 75                  |                      | N                             |                                   |
| Erdal et al            | 71                       | 71        | -          | -                   |                      |                               |                                   |
| Sun et al              | 67                       | 37        | 30         |                     |                      |                               |                                   |
| Booth et al            | 66                       | 66        | -          | -                   |                      | N                             |                                   |
| Yarza et al            | 63                       | 63        | -          | -                   |                      | N                             |                                   |
| Vuagnat et al          | 59                       | 28        | 31         | -                   |                      | 9                             |                                   |
| Wang B et al           | 58                       | 36        | 22         | -                   |                      | N                             |                                   |
| Assaad et al           | 55                       | -         |            | -                   | 55                   | N                             |                                   |
| Fox et al              | 55                       | 47        | 8          | -                   |                      | 4                             |                                   |
| Yang F et al           | 52                       | -         |            | -                   | 52                   | N                             |                                   |
| Suleyman et al         | 49                       | 43        | 6          | -                   | -                    | N                             |                                   |
| Rogado et al           | 45                       | 38        | 7          | -                   | -                    | P                             |                                   |
| Sanchez-Pina et al     | 39                       | -         | -          | 39                  | -                    | 1                             | 1                                 |
| Ma et al               | 37                       | 37        | -          | -                   | -                    | N                             |                                   |
| Aries et al            | 35                       | 35        | -          | -                   | -                    | N                             |                                   |
| Martin-Moro et al      | 34                       | 34        | -          | -                   | -                    | N                             |                                   |
| Joharatnam-Hogan et al | 30                       | 30        | -          | -                   | -                    | 1                             |                                   |
| Zhang L et al          | 28                       | 28        | -          | -                   | -                    | 8                             |                                   |
| Kalinsky et al         | 27                       | 7         | 20         | -                   | -                    | N                             |                                   |

| Publication       | Total number of patients | Inpatient | Outpatient | Both (no breakdown) | Unknown/missing data | Possible nosocomial infection | Hospitalised at time of infection |
|-------------------|--------------------------|-----------|------------|---------------------|----------------------|-------------------------------|-----------------------------------|
| Malard et al      | 25                       |           |            | 25                  | -                    | 10 possibly                   | 6                                 |
| Stroppa et al     | 25                       | 25        |            |                     | -                    | N                             |                                   |
| Ciceri et al      | 22                       | 22        |            |                     | -                    | N                             |                                   |
| Tomlins et al     | 20                       | 20        |            |                     | -                    | N                             |                                   |
| Bogani et al      | 19                       | 19        |            |                     | -                    | N                             |                                   |
| Liang et al       | 18                       | 18        |            |                     | -                    | N                             |                                   |
| Guan et al        | 18                       | 18        |            |                     | -                    | P                             |                                   |
| Tagliamento et al | 17                       | 13        | 4          |                     | -                    | N                             |                                   |
| Wang L et al      | 15                       | 15        |            |                     | -                    | N                             |                                   |
| He et al          | 13                       | 13        |            |                     | -                    | N                             |                                   |
| Lattenist et al   | 13                       | 13        |            |                     | -                    | 1                             |                                   |
| Yu et al          | 12                       | 12        |            |                     | -                    | N                             |                                   |
| Wu et al          | 11                       |           |            |                     | 11                   | N                             |                                   |

**eTable 6.** Inpatient vs. outpatient care across 73 studies as well as possible or probable nosocomial infection.

| <b>Cancer type</b>                        | <b>Number of patients</b> | <b>% of total</b> |
|-------------------------------------------|---------------------------|-------------------|
| <b>Haematological<sup>1</sup></b>         | 9,672                     | 22.14%            |
| <b>Breast</b>                             | 8,322                     | 19.05%            |
| <b>Genito-urinary<sup>2</sup></b>         | 7,624                     | 17.46%            |
| <b>Skin and melanoma</b>                  | 6,163                     | 14.11%            |
| <b>Gastrointestinal</b>                   | 4,124                     | 9.44%             |
| <b>Lung and thoracic<sup>3</sup></b>      | 2,104                     | 4.82%             |
| <b>Lower Gastrointestinal<sup>4</sup></b> | 1,259                     | 2.88%             |
| <b>Other/unspecified</b>                  | 1,139                     | 2.61%             |
| <b>Gynaecological</b>                     | 939                       | 2.15%             |
| <b>Upper Gastrointestinal</b>             | 632                       | 1.45%             |
| <b>Head and Neck</b>                      | 582                       | 1.33%             |
| <b>Endocrine</b>                          | 422                       | 0.97%             |
| <b>Central Nervous System</b>             | 256                       | 0.59%             |
| <b>Sarcoma</b>                            | 158                       | 0.36%             |
| <b>Hepatobiliary</b>                      | 135                       | 0.31%             |
| <b>Pancreatic</b>                         | 118                       | 0.27%             |
| <b>Neuroendocrine</b>                     | 11                        | 0.03%             |
| <b>Bone/soft tissue</b>                   | 10                        | 0.02%             |
| <b>Cancer of Unknown Primary</b>          | 6                         | 0.01%             |
|                                           | <b>43,676</b>             |                   |

**eTable 7.** Tumour prevalence across studies included.

<sup>1</sup> acute myeloid leukaemia, chronic lymphocytic leukaemia, multiple myeloma, lymphoma, myelodysplastic syndrome, histiocytosis. <sup>2</sup> NSCLC, SCLC, thymoma, carcinoid, malignant pleural mesothelioma, thymic. <sup>3</sup> Kidney, bladder, adrenal, urothelial, testis, prostate, penile. <sup>4</sup> Colorectal and anal.

|                           | Haematological | Breast | Genito-urinary | Lung and thoracic | Other/unspecified | Gynaecological | Gastrointestinal | Lower GI | Head and Neck | Upper GI | Hepatobiliary | Skin and melanoma | CNS | Sarcoma | Endocrine | Pancreatic | Bone/soft tissue | CUP | Neuroendocrine | Total  |
|---------------------------|----------------|--------|----------------|-------------------|-------------------|----------------|------------------|----------|---------------|----------|---------------|-------------------|-----|---------|-----------|------------|------------------|-----|----------------|--------|
| Sharafeldin et al         | 4,749          | 5,482  | 4,738          |                   |                   |                | 3,413            |          |               |          |               | 5,743             |     |         |           |            |                  |     |                | 24,125 |
| Grivas et al <sup>1</sup> | 1,097          | 967    | 1,176          | 409               | 54                | 322            | 108              | 404      | 151           | 266      |               | 183               | 78  | 110     | 235       |            |                  |     |                | 4966   |
| Özdemir et al             |                | 302    | 313            | 157               | 340               |                |                  | 165      |               |          |               | 45                |     |         | 140       |            |                  |     |                | 1523   |
| Lievre et al              |                | 173    | 65             | 311               | 6                 | 79             | 73               | 185      | 104           | 92       | 34            | 14                | 65  |         |           | 86         |                  |     |                | 1287   |
| Lee et al                 | 227            | 143    | 195            | 122               |                   | 56             | 95               | 124      | 33            |          |               |                   | 25  | 16      | 4         |            | 4                |     |                | 1044   |
| Pinato et al              | 137            | 162    | 132            | 119               | 52                | 41             | 105              |          | 29            | 40       | 45            | 28                |     |         |           |            |                  |     |                | 890    |
| Yigenoglu et al           | 740            |        |                |                   |                   |                |                  |          |               |          |               |                   |     |         |           |            |                  |     |                | 740    |
| Johannesen et al          |                | 85     | 140            | 13                |                   | 33             |                  |          |               | 73       |               | 98                | 20  |         | 20        |            |                  |     |                | 547    |
| Passamonti et al          | 536            |        |                |                   |                   |                |                  |          |               |          |               |                   |     |         |           |            |                  |     |                | 536    |
| Rüthrich et al            | 124            | 21     |                | 36                |                   | 39             | 60               |          |               |          |               |                   |     |         |           |            |                  |     |                | 435    |
| Montopoli et al           | 47             |        | 193            | 13                | 112               |                |                  | 65       |               |          |               |                   |     |         |           |            |                  |     |                | 430    |
| Robilotti et al           | 102            | 86     | 26             | 35                | 137               |                |                  | 37       |               |          |               |                   |     |         |           |            |                  |     |                | 423    |
| de Joode et al            | 112            | 47     | 51             | 51                | 23                | 11             |                  | 31       |               | 6        |               | 8                 |     |         |           | 4          |                  |     | 7              | 351    |
| Miyashita et al           |                | 57     | 74             | 23                | 164               |                |                  | 16       |               |          |               |                   |     |         |           |            |                  |     |                | 334    |
| Lunski et al              | 61             | 70     | 74             | 26                |                   | 13             | 32               |          | 8             |          |               | 2                 | 2   |         | 23        |            |                  |     |                | 312    |
| Jee et al                 | 76             | 55     | 33             | 30                |                   | 21             | 4                | 28       | 13            | 5        | 6             | 1                 | 5   | 14      |           | 16         | 1                |     | 1              | 309    |
| Song et al                |                | 37     | 21             | 62                |                   | 10             |                  | 33       | 41            | 29       | 14            |                   |     |         |           | 1          |                  |     |                | 248    |
| Tian et al                | 12             | 31     | 50             | 23                |                   | 15             |                  | 27       | 31            | 24       | 10            | 2                 | 3   | 2       |           | 2          |                  |     |                | 232    |
| Di Cosimo et al           | 14             | 65     | 25             | 42                | 1                 | 5              |                  | 26       | 9             | 38       |               | 3                 | 3   |         |           |            |                  |     |                | 231    |
| Mehta V et al             | 54             | 28     | 46             | 11                |                   | 13             |                  | 21       | 8             | 8        | 7             | 3                 | 8   |         |           | 3          | 5                |     | 3              | 218    |
| Yang K et al              | 22             | 40     | 14             | 24                |                   | 21             |                  | 28       | 23            | 19       | 8             | 2                 | 2   | 2       |           |            |                  |     |                | 205    |
| Ferrari et al             | 31             | 58     | 29             | 16                | 24                | 11             | 29               |          |               |          |               |                   |     |         |           |            |                  |     |                | 198    |
| Garassino et al           |                |        |                | 198               |                   |                |                  |          |               |          |               |                   |     |         |           |            |                  |     |                | 198    |
| Mato et al                | 198            |        |                |                   |                   |                |                  |          |               |          |               |                   |     |         |           |            |                  |     |                | 198    |
| Scarfo et al              | 190            |        |                |                   |                   |                |                  |          |               |          |               |                   |     |         |           |            |                  |     |                | 190    |
| Mehta A et al             | 33             | 19     |                | 17                | 36                |                | 40               |          | 33            |          |               | 6                 | 2   |         |           |            |                  |     |                | 186    |
| de Melo et al             | 35             | 40     | 17             | 7                 |                   | 22             |                  | 14       | 11            | 6        | 2             | 4                 | 15  | 4       |           | 2          |                  | 2   |                | 181    |
| Albiges et al             | 30             | 32     | 20             | 17                | 10                | 23             | 21               |          | 22            |          |               | 11                |     |         |           |            |                  |     |                | 178    |
| Martinez-Lopez et al      | 167            |        |                |                   |                   |                |                  |          |               |          |               |                   |     |         |           |            |                  |     |                | 167    |
| Russell et al             | 28             | 24     | 34             | 17                | 10                | 11             | 21               |          |               |          |               |                   | 11  |         |           |            |                  |     |                | 156    |
| Basse et al               | 19             | 57     | 2              | 18                | 6                 | 12             | 11               |          | 8             |          |               |                   | 2   | 6       |           |            |                  |     |                | 141    |
| Lara et al                |                |        |                |                   |                   | 121            |                  |          |               |          |               |                   |     |         |           |            |                  |     |                | 121    |
| Brar et al                | 42             | 15     | 22             |                   | 12                | 6              | 19               |          | 1             |          |               |                   |     |         |           |            |                  |     |                | 117    |
| Angelis et al             | 18             | 18     | 12             | 15                |                   | 6              | 32               |          | 4             |          |               | 3                 | 4   | 1       |           |            |                  |     |                | 113    |
| Meng et al                | 16             |        |                | 17                | 76                |                |                  |          |               |          |               |                   |     |         |           |            |                  |     |                | 109    |
| Kabarriti et al 2         | 4              | 28     | 27             | 14                | 23                | 7              |                  |          | 6             |          |               |                   |     |         |           |            |                  |     |                | 109    |



|                        |       |       |       |       |       |     |       |       |     |     |     |       |     |     |     |     |    |   |    |       |
|------------------------|-------|-------|-------|-------|-------|-----|-------|-------|-----|-----|-----|-------|-----|-----|-----|-----|----|---|----|-------|
| Zhang H et al          | 9     | 10    | 20    | 21    |       |     | 20    |       | 17  |     | 3   |       | 6   |     |     | 1   |    |   |    | 107   |
| Dai et al              | 9     | 11    |       | 22    | 27    | 6   | 13    |       | 11  | 6   |     |       |     |     |     |     |    |   |    | 105   |
| Luo et al              |       |       |       | 102   |       |     |       |       |     |     |     |       |     |     |     |     |    |   |    | 102   |
| Cattaneo et al         | 102   |       |       |       |       |     |       |       |     |     |     |       |     |     |     |     |    |   |    | 102   |
| Hultcrantz et al       | 100   |       |       |       |       |     |       |       |     |     |     |       |     |     |     |     |    |   |    | 100   |
| Singh et al            | 22    | 12    | 23    | 9     |       |     | 9     |       | 2   |     |     | 4     | 1   | 2   |     |     |    | 1 |    | 85    |
| Shah et al             | 80    |       |       |       |       |     |       |       |     |     |     |       |     |     |     |     |    |   |    | 80    |
| Cook et al             | 75    |       |       |       |       |     |       |       |     |     |     |       |     |     |     |     |    |   |    | 75    |
| Erdal et al            | 12    | 11    | 12    | 7     | 1     |     | 19    |       | 5   |     |     | 2     | 2   |     |     |     |    |   |    | 71    |
| Booth et al            | 66    |       |       |       |       |     |       |       |     |     |     |       |     |     |     |     |    |   |    | 66    |
| Yarza et al            |       | 10    | 9     | 17    |       | 2   |       | 10    | 4   | 6   |     |       | 1   | 1   |     |     |    | 3 |    | 63    |
| Vuagnat et al          |       | 59    |       |       |       |     |       |       |     |     |     |       |     |     |     |     |    |   |    | 59    |
| Wang B et al           | 58    |       |       |       |       |     |       |       |     |     |     |       |     |     |     |     |    |   |    | 58    |
| Fox et al              | 55    |       |       |       |       |     |       |       |     |     |     |       |     |     |     |     |    |   |    | 55    |
| Yang F et al           |       | 9     | 2     | 10    | 7     | 4   |       | 13    | 3   | 2   | 2   |       |     |     |     |     |    |   |    | 52    |
| Rogado et al           |       | 6     | 5     | 17    | 11    |     |       | 6     |     |     |     |       |     |     |     |     |    |   |    | 45    |
| Sanchez-Pina et al     | 39    |       |       |       |       |     |       |       |     |     |     |       |     |     |     |     |    |   |    | 39    |
| Ma et al               |       | 7     |       | 8     | 6     | 5   |       | 11    |     |     |     |       |     |     |     |     |    |   |    | 37    |
| Aries et al            | 35    |       |       |       |       |     |       |       |     |     |     |       |     |     |     |     |    |   |    | 35    |
| Martin-Moro et al      | 34    |       |       |       |       |     |       |       |     |     |     |       |     |     |     |     |    |   |    | 34    |
| Joharatnam-Hogan et al | 1     | 4     | 9     | 5     |       |     |       | 5     | 1   | 1   | 1   | 1     |     |     |     | 2   |    |   |    | 30    |
| Zhang L et al          |       | 3     | 3     | 7     |       | 3   |       | 2     | 3   | 5   | 2   |       |     |     |     |     |    |   |    | 28    |
| Kalinsky et al         |       | 27    |       |       |       |     |       |       |     |     |     |       |     |     |     |     |    |   |    | 27    |
| Malard et al           | 25    |       |       |       |       |     |       |       |     |     |     |       |     |     |     |     |    |   |    | 25    |
| Stroppa et al          | 2     | 2     | 6     | 8     | 1     |     |       |       |     | 6   |     |       |     |     |     |     |    |   |    | 25    |
| Bogani et al           |       |       |       |       |       | 19  |       |       |     |     |     |       |     |     |     |     |    |   |    | 19    |
| Liang et al            | 1     | 3     | 4     | 5     |       |     |       | 4     | 1   |     |     |       |     |     |     |     |    |   |    | 18    |
| Tagliamento et al      |       | 5     | 1     | 9     |       |     |       | 1     |     |     |     |       | 1   |     |     |     |    |   |    | 17    |
| He et al               | 13    |       |       |       |       |     |       |       |     |     |     |       |     |     |     |     |    |   |    | 13    |
| Lattenist et al        | 13    |       |       |       |       |     |       |       |     |     |     |       |     |     |     |     |    |   |    | 13    |
| Yu et al               |       | 1     | 1     | 7     |       |     |       | 2     |     |     |     |       |     |     |     | 1   |    |   |    | 12    |
| Wu et al               |       |       |       | 7     |       | 2   |       | 1     |     |     | 1   |       |     |     |     |     |    |   |    | 11    |
| Total                  | 9,672 | 8,322 | 7,624 | 2,104 | 1,139 | 939 | 4,124 | 1,259 | 582 | 632 | 135 | 6,163 | 256 | 158 | 422 | 118 | 10 | 6 | 11 | 43676 |

**eFigure 12.** Tumour Type Breakdown Across 68 Studies, Where Reported

<sup>1</sup>107 patients reported as multi-cancers; <sup>2</sup>Patients had two primary tumours and so were counted twice. CNS, central nervous system; CUP, cancer of unknown primary; GI, gastrointestinal.

**eResults.** Presenting Symptoms of SARS-CoV-2 Infection, Radiological Findings, Ethnicity and Stage of Malignancy and Outcome

### **Presenting symptoms of SARS-CoV-2 infection**

Fifty-three (65%) of the 81 studies, involving 9,196 patients, reported presenting symptoms. The most commonly reported symptoms were fever, cough, dyspnoea, fatigue/malaise, diarrhoea, and myalgia (eFigure 11). The time from onset of symptoms to hospitalisation ranged between 1-40 days, where reported<sup>1-7</sup>.

### **Radiological findings**

Radiological findings of thoracic imaging based on chest radiograph, CT scanning or a combination of chest radiograph and CT scan in cancer patients with COVID-19 were available in 28 studies (n=3,650 patients)<sup>2-4,7-31</sup>. A total of 19 (26%) studies (n=3,086 patients) provided details of radiological changes (eTable 8)<sup>2,3,7,8,10-12,14,15,17,20-24,26,27,29,30</sup>. CT features of ground glass opacity, patchy shadows, fibrous stripes, pleural thickening, bilateral involvement, and tumour pulmonary involvement in cancer patients were associated with worsening severity of COVID-19 disease<sup>3,7,8,21,26,29</sup>.

### **Ethnicity**

12 studies looked at association of ethnicity in cancer patients and outcomes, of which 8 found that African-American patients had more severe COVID-19 and increased mortality compared to white patients on both unadjusted analysis<sup>5,6,11,32,33</sup> and multivariable analysis<sup>20,34,35</sup>. Two studies found non-white patients to be significantly associated with hospitalisation and severe illness compared to white race<sup>14,40</sup>; and Asian ethnicity was

associated with increased mortality [HR 3.73; 95% CI: 1.28-10.91] in an adjusted analysis <sup>28</sup> While 10 studies did not find a significant association between ethnicity and poor outcome<sup>1,18,34,36-41</sup>. One of these studies found that hospitalised black cancer patients had lower mortality rates in adjusted analysis (OR 0.72, 95% CI 0.53-0.98) compared to non-white Hispanic patients <sup>42</sup>. Hispanic patients did not have increased risk of mortality compared to non-Hispanic patients <sup>41</sup>. Non-white race was found to be significantly associated with hospitalisation and severe illness compared to white race <sup>6,20</sup>. Asian ethnicity was associated with increased mortality [HR 3.73; 95% CI: 1.28-10.91] in adjusted analysis <sup>43</sup>.

### **Stage of malignancy and outcome**

There was variability with regards to the reported effect of stage of malignancy on outcomes with COVID-19. In unadjusted analysis, 8 studies have reported stage IV disease (of solid cancers) to be associated with significantly higher risk of severe events and mortality compared to patients with stage I, II or III disease <sup>2,3,8,25,29,44-46</sup>. However, five studies found no association with metastatic primary disease late stage of disease and rates of hospitalisation or mortality <sup>1,22,26,36,47</sup>. A study of 181 patients in Brazil found that those with 2 or more metastatic sites had an overall increased risk of death <sup>26</sup>.

### **eReferences**

1. Garassino MC, Whisenant JG, Huang L-C, et al. COVID-19 in patients with thoracic malignancies (TERAVOLT): first results of an international, registry-based, cohort study. *The Lancet Oncology* 2020; **21**(7): 914-22.
2. Pinato DJ, Zambelli A, Aguilar-Company J, et al. Clinical portrait of the SARS-CoV-2 epidemic in European cancer patients. *Cancer Discov* 2020; **10**(10): 1465-74.
3. Yang KY, Sheng YH, Huang CL, et al. Clinical characteristics, outcomes, and risk factors for mortality in patients with cancer and COVID-19 in Hubei, China: a multicentre, retrospective, cohort study. *Lancet Oncology* 2020; **21**(7): 904-13.

4. Albiges L, Foulon S, Bayle A, et al. Determinants of the outcomes of patients with cancer infected with SARS-CoV-2: results from the Gustave Roussy cohort. *Nature Cancer* 2020; **1**(10): 965-75.
5. Lara OD, O’Cearbhaill RE, Smith MJ, et al. COVID-19 outcomes of patients with gynecologic cancer in New York City. *Cancer* 2020; **126**(19): 4294-303.
6. Wang B, Van Oekelen O, Mouhieddine TH, et al. A tertiary center experience of multiple myeloma patients with COVID-19: Lessons learned and the path forward. *Journal of Hematology and Oncology* 2020; **13**(1).
7. Zhang L, Zhu F, Xie L, et al. Clinical characteristics of COVID-19-infected cancer patients: a retrospective case study in three hospitals within Wuhan, China. *Ann Oncol* 2020; **31**(7): 894-901.
8. Tian JB, Yuan XL, Xiao J, et al. Clinical characteristics and risk factors associated with COVID-19 disease severity in patients with cancer in Wuhan, China: a multicentre, retrospective, cohort study. *Lancet Oncology* 2020; **21**(7): 893-903.
9. Mato AR, Roeker LE, Lamanna N, et al. Outcomes of COVID-19 in patients with CLL: a multicenter international experience. *Blood* 2020; **136**(10): 1134-43.
10. Vuagnat P, Frelaut M, Ramtohl T, et al. COVID-19 in breast cancer patients: a cohort at the Institut Curie hospitals in the Paris area. *Breast Cancer Research* 2020; **22**(1): 55.
11. Fox TA, Troy-Barnes E, Kirkwood AA, et al. Clinical outcomes and risk factors for severe COVID-19 in patients with haematological disorders receiving chemo- or immunotherapy. *British Journal of Haematology* 2020; **191**(2): 194-206.
12. Sanchez-Pina JM, Rodríguez Rodríguez M, Castro Quismondo N, et al. Clinical course and risk factors for mortality from COVID-19 in patients with haematological malignancies. *European Journal of Haematology* 2020; **105**(5): 597-607.
13. Kalinsky K, Accordino MK, Hosi K, et al. Characteristics and outcomes of patients with breast cancer diagnosed with SARS-Cov-2 infection at an academic center in New York City. *Breast Cancer Res Treat* 2020; **182**(1): 239-42.
14. Malard F, Genthon A, Brissot E, et al. COVID-19 outcomes in patients with hematologic disease. *Bone Marrow Transplant* 2020; **55**(11): 2180-4.
15. Stroppa EM, Toscani I, Citterio C, et al. Coronavirus disease-2019 in cancer patients. A report of the first 25 cancer patients in a western country (Italy). *Future oncology (London, England)* 2020; **16**(20): 1425-32.
16. Bogani G, Ditto A, Bosio S, Brusadelli C, Raspagliesi F. Cancer patients affected by COVID-19: Experience from Milan, Lombardy. *Gynecologic Oncology* 2020; **158**(2): 262-5.
17. He WJ, Chen L, Chen L, et al. COVID-19 in persons with haematological cancers. *Leukemia* 2020; **34**(6): 1637-45.
18. Lattenist R, Yildiz H, De Greef J, Bailly S, Yombi JC. COVID-19 in Adult Patients with Hematological Disease: Analysis of Clinical Characteristics and Outcomes. *Indian journal of hematology & blood transfusion : an official journal of Indian Society of Hematology and Blood Transfusion* 2020: 1-5.
19. Yu J, Ouyang W, Chua MLK, Xie C. SARS-CoV-2 Transmission in Patients With Cancer at a Tertiary Care Hospital in Wuhan, China. *JAMA Oncology* 2020; **6**(7): 1108-10.
20. Robilotti EV, Babady NE, Mead PA, et al. Determinants of COVID-19 disease severity in patients with cancer. *Nature Medicine* 2020; **26**(8): 1218-23.
21. Angelis V, Tippu Z, Joshi K, et al. Defining the true impact of coronavirus disease 2019 in the at-risk population of patients with cancer. *Eur J Cancer* 2020; **136**: 99-106.

22. Jee J, Foote MB, Lumish M, et al. Chemotherapy and COVID-19 Outcomes in Patients With Cancer. *Journal of Clinical Oncology* 2020; **38**(30): 3538-46.
23. Meng Y, Lu W, Guo E, et al. Cancer history is an independent risk factor for mortality in hospitalized COVID-19 patients: a propensity score-matched analysis. *J Hematol Oncol* 2020; **13**(1): 75.
24. Cook G, John Ashcroft A, Pratt G, et al. Real-world assessment of the clinical impact of symptomatic infection with severe acute respiratory syndrome coronavirus (COVID-19 disease) in patients with multiple myeloma receiving systemic anti-cancer therapy. *British Journal of Haematology* 2020; **190**(2): e83-e6.
25. Erdal GS, Polat O, Erdem GU, et al. The mortality rate of COVID-19 was high in cancer patients: a retrospective single-center study. *Int J Clin Oncol* 2021; **26**(5): 826-34.
26. Yarza R, Bover M, Paredes D, et al. SARS-CoV-2 infection in cancer patients undergoing active treatment: analysis of clinical features and predictive factors for severe respiratory failure and death. *European journal of cancer (Oxford, England : 1990)* 2020; **135**: 242-50.
27. Martín-Moro F, Marquet J, Piris M, et al. Survival study of hospitalised patients with concurrent COVID-19 and haematological malignancies. *British Journal of Haematology* 2020; **190**(1): e16-e20.
28. Guan W-j, Liang W-h, Zhao Y, et al. Comorbidity and its impact on 1590 patients with COVID-19 in China: a nationwide analysis. *European Respiratory Journal* 2020; **55**(5): 2000547.
29. Song K, Gong H, Xu B, et al. Association between recent oncologic treatment and mortality among patients with carcinoma who are hospitalized with COVID-19: A multicenter study. *Cancer* 2021; **127**(3): 437-48.
30. Basse C, Diakite S, Servois V, et al. Characteristics and Outcome of SARS-CoV-2 Infection in Cancer Patients. *JNCI Cancer Spectrum* 2021; **5**(1).
31. Joharatnam-Hogan N, Hochhauser D, Shiu K-K, et al. Outcomes of the 2019 novel coronavirus in patients with or without a history of cancer: a multi-centre North London experience. *Therapeutic Advances in Medical Oncology* 2020; **12**: 1758835920956803.
32. Shah V, Ko TK, Zuckerman M, et al. Poor outcome and prolonged persistence of SARS-CoV-2 RNA in COVID-19 patients with haematological malignancies; King's College Hospital experience. *British Journal of Haematology* 2020; **190**(5): E279-E82.
33. Hultcrantz M, Richter J, Rosenbaum C, et al. COVID-19 infections and outcomes in patients with multiple myeloma in New York City: a cohort study from five academic centers. *medRxiv : the preprint server for health sciences* 2020: 2020.06.09.20126516.
34. Grivas P, Khaki AR, Wise-Draper TM, et al. Association of clinical factors and recent anticancer therapy with COVID-19 severity among patients with cancer: a report from the COVID-19 and Cancer Consortium. *Ann Oncol* 2021; **32**(6): 787-800.
35. Sharafeldin N, Bates B, Song Q, et al. Outcomes of COVID-19 in Patients With Cancer: Report From the National COVID Cohort Collaborative (N3C). *Journal of Clinical Oncology*; **0**(0): JCO.21.01074.
36. Singh SRK, Thanikachalam K, Jabbour-Aida H, Poisson LM, Khan G. Covid-19 and cancer: Lessons learnt from a michigan hotspot. *Cancers* 2020; **12**(9): 1-13.
37. Sun L, Surya S, Le AN, et al. Rates of COVID-19-Related Outcomes in Cancer Compared With Noncancer Patients. *JNCI Cancer Spectr* 2021; **5**(1): pkaa120.
38. Brar G, Pinheiro LC, Shusterman M, et al. COVID-19 Severity and Outcomes in Patients With Cancer: A Matched Cohort Study. *Journal of Clinical Oncology* 2020; **38**(33): 3914-24.

39. Mehta V, Goel S, Kabarriti R, et al. Case Fatality Rate of Cancer Patients with COVID-19 in a New York Hospital System. *Cancer discovery* 2020; **10**(7): 935-41.
40. Ciceri F, Castagna A, Rovere-Querini P, et al. Early predictors of clinical outcomes of COVID-19 outbreak in Milan, Italy. *Clin Immunol* 2020; **217**: 108509.
41. Kabarriti R, Brodin NP, Maron MI, et al. Extent of Prior Lung Irradiation and Mortality in COVID-19 Patients With a Cancer History. *Advances in Radiation Oncology* 2020; **5**(4): 707-10.
42. Lunski MJ, Burton J, Tawagi K, et al. Multivariate mortality analyses in COVID-19: Comparing patients with cancer and patients without cancer in Louisiana. *Cancer*; **n/a**(n/a).
43. Russell B, Moss C, Papa S, et al. Factors Affecting COVID-19 Outcomes in Cancer Patients: A First Report From Guy's Cancer Center in London. *Frontiers in Oncology* 2020; **10**.
44. Dai M, Liu D, Liu M, et al. Patients with Cancer Appear More Vulnerable to SARS-CoV-2: A Multicenter Study during the COVID-19 Outbreak. *Cancer discovery* 2020; **10**(6): 783-91.
45. de Melo AC, Thuler LCS, da Silva JL, et al. Cancer inpatients with COVID-19: A report from the Brazilian National Cancer Institute. *PLoS One* 2020; **15**(10): e0241261.
46. Lièvre A, Turpin A, Ray-Coquard I, et al. Risk factors for Coronavirus Disease 2019 (COVID-19) severity and mortality among solid cancer patients and impact of the disease on anticancer treatment: A French nationwide cohort study (GCO-002 CACOV-19). *European Journal of Cancer* 2020; **141**: 62-81.
47. de Joode K, Dumoulin DW, Tol J, et al. Dutch Oncology COVID-19 consortium: Outcome of COVID-19 in patients with cancer in a nationwide cohort study. *European Journal of Cancer* 2020; **141**: 171-84.

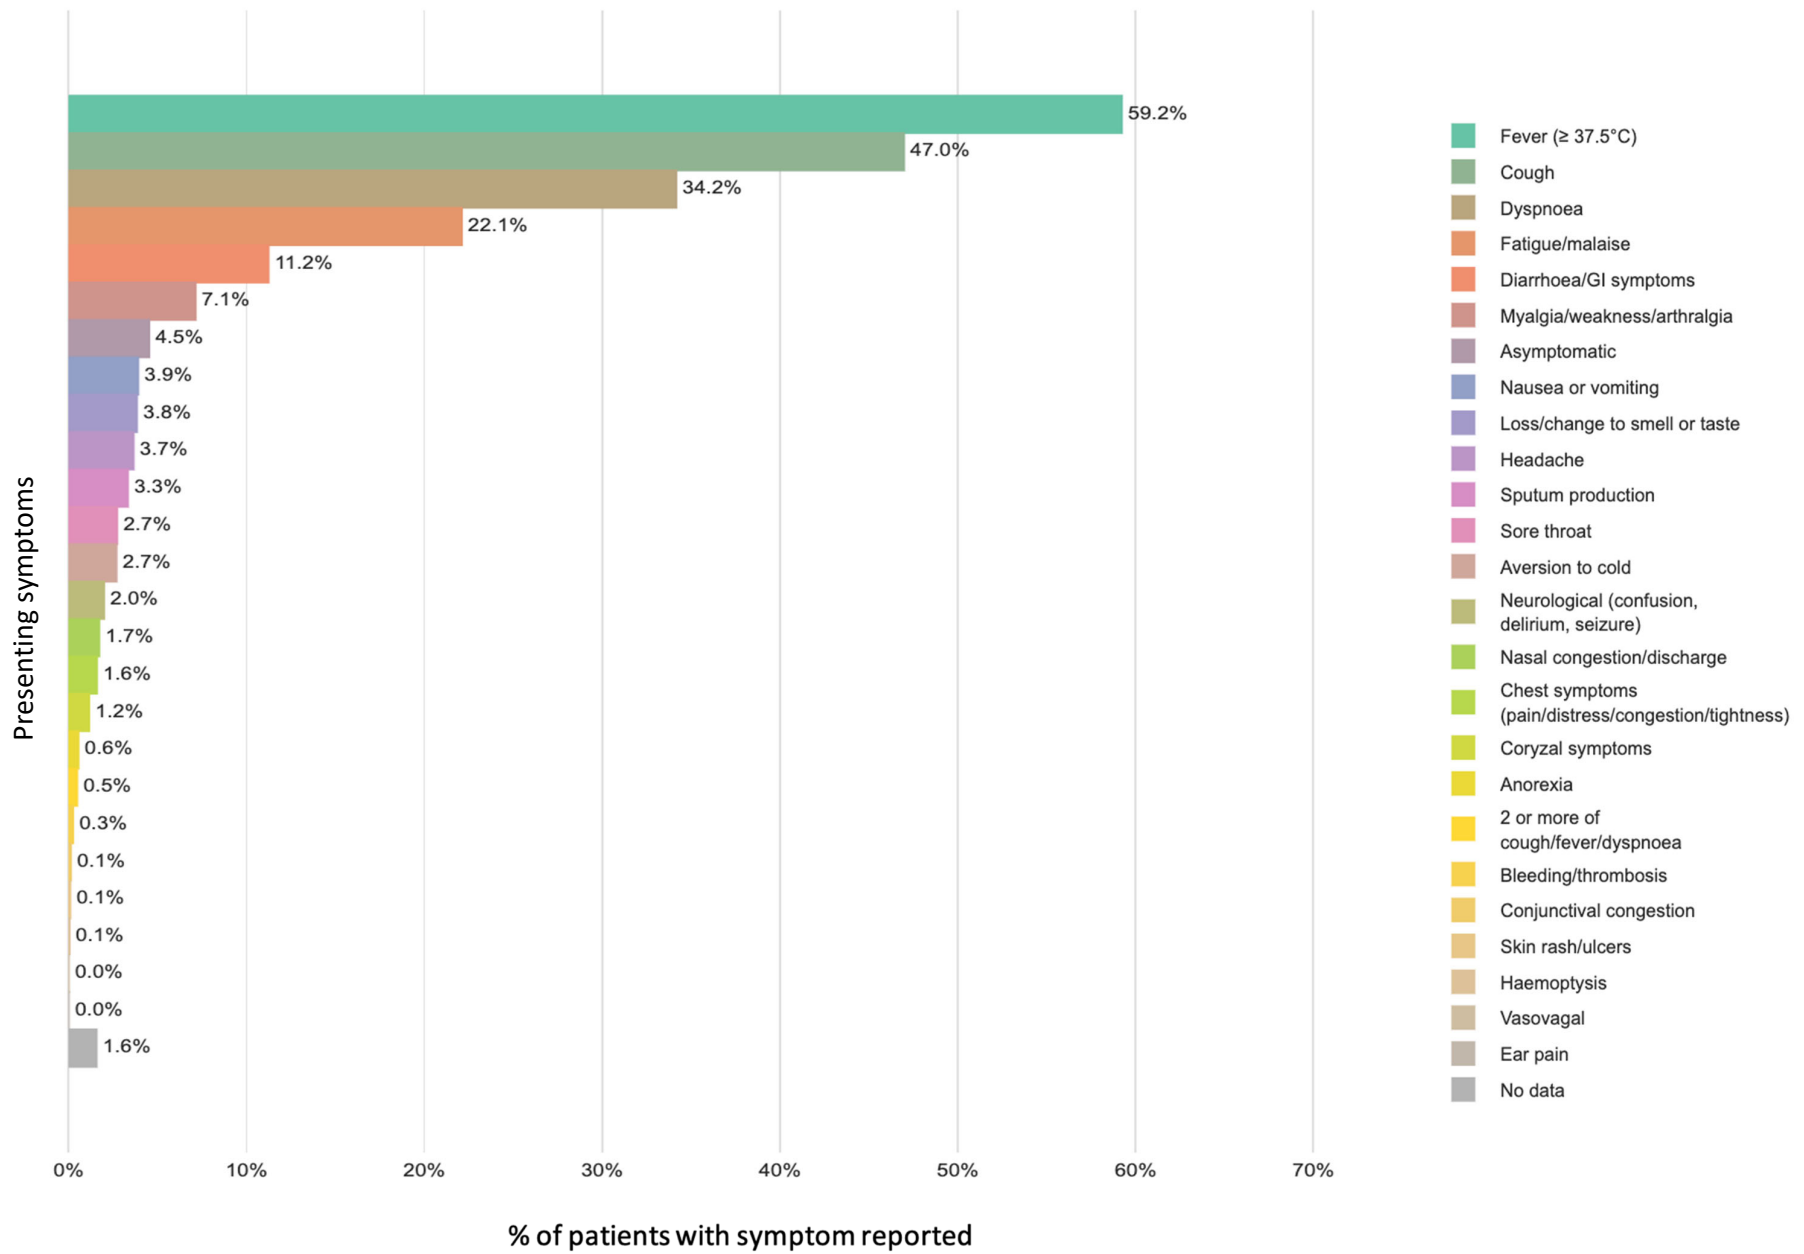

**eFigure 13** Presenting symptoms, includes 9,196 patients.

| Publication            | Imaging Modality                 | Bilateral involvement | Ground glass | Patchy shadows | Consolidation | Infiltrates | Other* |
|------------------------|----------------------------------|-----------------------|--------------|----------------|---------------|-------------|--------|
| Pinato et al           | CT or CXR: 811                   | 427                   |              |                |               |             |        |
| Robilotti et al        | CT: 39, CXR: 207                 | 23                    | 30           |                | 13            |             | 32     |
| Jee et al              | -                                | 76                    |              |                | 34            |             |        |
| Song et al             | -                                | 188                   |              |                | 53            |             | 185    |
| Tian et al             | CT: 232                          | 150                   | 148          | 126            |               |             | 165    |
| Yang K et al           | CT: 190                          | 173                   | 132          |                |               |             |        |
| Mato et al             | CT or CXR: 183                   |                       |              |                |               |             |        |
| Albiges et al          | CT: 133                          |                       |              |                |               |             |        |
| Basse et al            | CT: 80                           |                       | 24           |                | 7             |             |        |
| Angelis et al          | CT: 20, CXR: 86                  |                       |              |                |               | 47          |        |
| Meng et al             | -                                | 27                    | 25           |                |               |             |        |
| Cook et al             | -                                |                       |              |                |               | 56          |        |
| Yarza et al            | -                                | 33                    |              |                |               | 60          |        |
| Vuagnat et al          | CT: 39                           |                       | 14           |                |               |             |        |
| Fox et al              | CT or CXR: 9                     |                       | 71           |                |               |             | 7      |
| Sanchez-Pina et al     | CT: 39                           | 28                    |              |                |               |             |        |
| Martin-Moro et al      | -                                |                       |              |                |               | 30          |        |
| Joharatnam-Hogan et al | CXR: 29                          |                       |              |                |               |             |        |
| Zhang L et al          | CT: 28                           |                       | 21           |                | 13            |             | 4      |
| Kalinsky et al         | CT: 39                           |                       |              |                |               |             |        |
| Malard et al           | CT: 14, CXR: 7                   | 21                    |              |                |               |             |        |
| Stroppa et al          | CT: 22, CXR: 3                   | 22                    |              |                |               |             | 25     |
| Bogani et al           | CT: 18                           |                       |              |                |               |             |        |
| Guan et al             | CT: 14, CXR: 7                   |                       |              |                |               |             |        |
| He et al               | CT: 22, CXR: 3                   |                       | 8            | 2              | 1             |             | 1      |
| Lattenist et al        | CT: 18                           |                       |              |                |               |             |        |
| Yu et al               | CT: 11                           |                       |              |                |               |             |        |
| <b>Total:</b>          | CT: 958, CXR: 525, either: 1,003 | 1,168                 | 473          | 128            | 121           | 193         | 419    |

**eTable 8.** Chest radiograph ± chest x ray imaging on admission with radiological changes documented, where reported. \*Nodules/interstitial thickening/erratic paving.



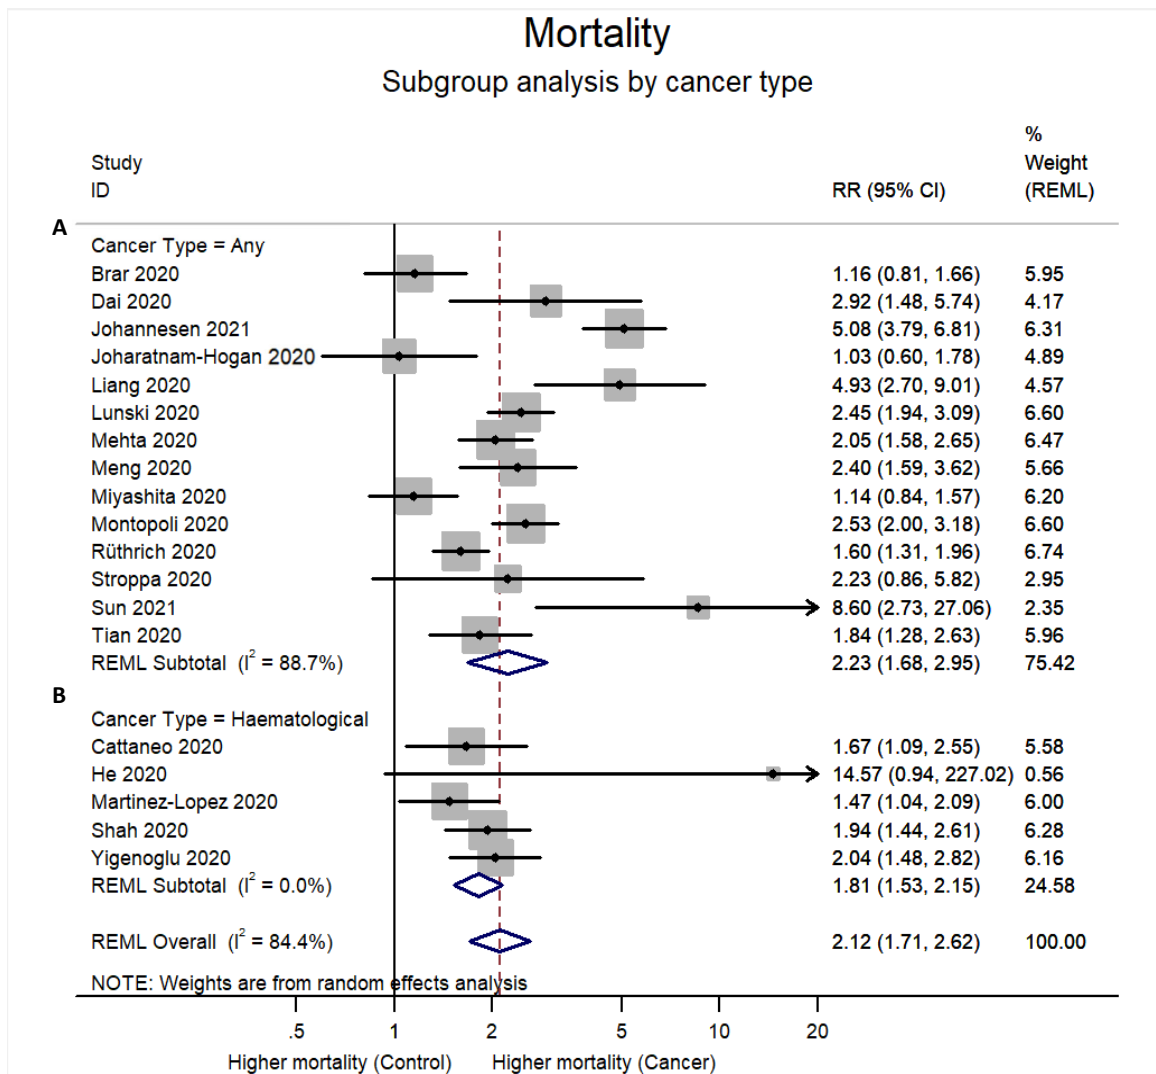

**eFigure 14.** (A) Overall risk of mortality in COVID-19 patients with any cancer type compared with those with haematological malignancies. (B) Overall risk of mortality in COVID-19 patients with haematological malignancies as compared to those with solid malignancies.

| <b>A) Age (obs: 14)</b>                          |                |                       |          |                  | <b>tau2=0.06352, I<sup>2</sup>=54.7%</b>  |
|--------------------------------------------------|----------------|-----------------------|----------|------------------|-------------------------------------------|
| <i>Effect Size</i>                               | <i>exp (b)</i> | <i>Standard Error</i> | <i>t</i> | <i>P &gt; t </i> | <i>[95% Confidence Interval]</i>          |
| Age                                              | 0.9572513      | 0.0166774             | -2.51    | 0.028            | 0.9215953 – 0.9942868                     |
| <b>B) Male cancer patients (obs: 17)</b>         |                |                       |          |                  | <b>tau2=0.08595, I<sup>2</sup>=67.92%</b> |
| <i>Effect Size</i>                               | <i>exp (b)</i> | <i>Standard Error</i> | <i>t</i> | <i>P &gt; t </i> | <i>[95% Confidence Interval]</i>          |
| Male cancer patients                             | 1.187946       | 0.935615              | 0.22     | 0.830            | 0.221688 – 6.365771                       |
| <b>C) Age and male cancer patients (obs: 14)</b> |                |                       |          |                  | <b>tau2=0.06999, I<sup>2</sup>=57.07%</b> |
| <i>Effect Size</i>                               | <i>exp (b)</i> | <i>Standard Error</i> | <i>t</i> | <i>P &gt; t </i> | <i>[95% Confidence Interval]</i>          |
| Age                                              | 0.9517435      | 0.0188232             | -2.50    | 0.029            | 0.9112026 – 0.994088                      |
| Male cancer patients                             | 3.526408       | 7.123145              | 0.62     | 0.545            | 0.0413537 – 300.7112                      |

**eTable 9** Meta-regression results on the impact of (A) age, (B) male sex, and (C) both age and male sex. Obs, observations.

|                         | Cancer covid patients | Not hospitalised/ unknown | Number hospitalised | ICU admission | IMV   | CRRT | ECMO | Haemo-dialysis | IV Vasopre-ssors | Transition to DNR/DNI | Discharged | Remain Hospitalised | Death |
|-------------------------|-----------------------|---------------------------|---------------------|---------------|-------|------|------|----------------|------------------|-----------------------|------------|---------------------|-------|
| Sharafeldin et al, 2021 | 38,614                | 19,099                    | 19,515              |               | 1,600 |      | 27   |                |                  |                       |            |                     | 2,888 |
| Grivas et al, 2020      | 4,966                 | 2,094                     | 2,872               | 232           | 292   |      |      |                |                  |                       |            |                     | 695   |
| Özdemir et al, 2020     | 1,523                 | 661                       | 862                 | 173           | 113   |      |      |                |                  |                       |            |                     | 77    |
| Lievre et al, 2020      | 1289                  | 555                       | 734                 | 110           | 49    |      |      |                |                  |                       |            |                     | 322   |
| Lee et al, 2020         | 1044                  | 1003                      | 41                  | 63            | 43    |      |      |                |                  |                       |            | 41                  | 295   |
| Pinato et al, 2020      | 890                   | 120                       | 760                 | 110           | 35    |      |      |                |                  |                       |            |                     | 299   |
| Yigenoglu et al, 2020   | 740                   | 452                       | 288                 | 140           | 102   |      |      |                |                  |                       |            |                     | 102   |
| Johannesen et al, 2020  | 547                   | 427                       | 120                 | 17            | 17    |      |      |                |                  |                       |            |                     | 56    |
| Passamonti et al, 2020  | 536                   | 85                        | 451                 | 82            |       |      |      |                |                  |                       | 242        | 11                  | 198   |
| Rüthrich et al, 2020    | 435                   | 8                         | 427                 | 119           | 78    |      |      |                |                  |                       | 292        | 46                  | 97    |
| Robilotti et al, 2020   | 423                   | 243                       | 180                 | 48            | 40    |      |      |                |                  |                       |            |                     | 51    |
| Miyahsita et al, 2020   | 334                   |                           |                     |               | 37    |      |      |                |                  |                       |            |                     | 37    |
| Lunski et al, 2020      | 312                   | 146                       | 166                 | 48            |       |      |      |                |                  |                       |            |                     | 66    |
| Jee et al, 2020         | 309                   | 162                       | 147                 | 43            |       |      |      |                |                  |                       |            |                     | 31    |
| Tian et al, 2020        | 232                   | 0                         | 232                 |               | 21    |      |      |                |                  |                       |            |                     | 46    |
| Di Cosimo et al, 2020   | 231                   | 66                        | 165                 | 12            | 19    |      |      |                |                  |                       |            |                     | 81    |
| Mehta V et al, 2020     | 218                   | 28                        | 190                 | 23            | 45    |      |      |                |                  |                       |            | 35                  | 61    |
| Yang K et al, 2020      | 205                   | 0                         | 205                 | 30            | 21    | 5    |      | 5              |                  |                       | 165        |                     | 40    |

|                            | Cancer covid patients | Not hospitalised/ unknown | Number hospitalised | ICU admission | IMV | CRRT | ECMO | Haemo-dialysis | IV Vasopre-ssors | Transition to DNR/DNI | Discharged | Remain Hospitalised | Death |
|----------------------------|-----------------------|---------------------------|---------------------|---------------|-----|------|------|----------------|------------------|-----------------------|------------|---------------------|-------|
| Ferrari et al, 2020        | 198                   | 110                       | 88                  | 37            |     |      |      |                |                  |                       | 149        | 16                  | 33    |
| Garassino et al, 2020      | 198                   | 48                        | 152                 | 13            | 9   |      |      |                |                  |                       |            | 92                  | 66    |
| Mato et al, 2020           | 198                   | 20                        | 178                 | 68            | 53  |      |      |                | 47               |                       | 63         | 49                  | 66    |
| Scarfo et al, 2020         | 190                   | 21                        | 169                 | 39            |     |      |      |                |                  |                       | 96         | 37                  | 56    |
| Mehta A et al, 2020        | 186                   |                           |                     |               | 12  |      |      |                |                  |                       |            |                     | 27    |
| de Melo et al, 2020        | 178                   | 53                        | 125                 | 80            |     |      |      |                |                  |                       |            |                     | 60    |
| Albiges et al, 2020        | 167                   | 0                         | 167                 |               | 15  |      | 16   |                |                  |                       | 80         | 16                  | 31    |
| Martinez-Lopez et al, 2020 | 167                   | 0                         | 167                 |               | 15  |      |      |                |                  |                       | 110        | 1                   | 56    |
| Russell et al, 2020        | 156                   | 38                        | 118                 | 13            |     |      |      |                |                  |                       |            |                     | 34    |
| Basse et al, 2020          | 141                   | 91                        | 50                  | 11            |     |      |      |                |                  |                       | 100        | 11                  | 26    |
| Lara et al, 2020           | 121                   | 55                        | 66                  | 20            | 9   |      |      |                |                  |                       | 39         | 11                  | 18    |
| Montopoli et al, 2020      | 118                   | 8                         | 78                  | 14            |     |      |      |                |                  |                       |            |                     | 18    |
| Brar et al, 2020           | 117                   | 117                       | 0                   |               | 4   |      |      |                |                  |                       | 85         | 3                   | 29    |
| Angelis et al, 2020        | 113                   | 12                        | 101                 | 12            | 8   |      |      |                |                  |                       |            |                     | 29    |
| Meng et al, 2020           | 109                   | 0                         | 109                 |               | 9   |      |      |                |                  |                       | 77         |                     | 32    |
| Zhang H et al, 2020        | 107                   | 0                         | 107                 |               | 18  |      |      |                |                  |                       | 84         |                     | 23    |
| Dai et al, 2020            | 105                   | 0                         | 105                 | 20            | 11  | 4    | 3    | 4              |                  |                       |            |                     | 12    |
| Luo et al, 2020            | 102                   | 39                        | 63                  | 21            | 18  |      |      |                |                  | 18                    | 53         | 24                  | 25    |
| Cattaneo et al, 2020       | 102                   |                           |                     | 21            | 5   |      |      |                |                  |                       |            |                     | 40    |

|                          | Cancer covid patients | Not hospitalised/ unknown | Number hospitalised | ICU admission | IMV | CRRT | ECMO | Haemo-dialysis | IV Vasopre-ssors | Transition to DNR/DNI | Discharged | Remain Hospitalised | Death |
|--------------------------|-----------------------|---------------------------|---------------------|---------------|-----|------|------|----------------|------------------|-----------------------|------------|---------------------|-------|
| Hultcrantz et al, 2020   | 100                   | 25                        | 75                  | 17            | 13  |      |      |                |                  |                       |            |                     | 22    |
| Singh et al, 2020        | 85                    | 12                        | 73                  | 30            | 23  | 7    | 30   |                | 19               | 39                    | 38         | 3                   | 32    |
| Shah et al, 2020         | 80                    | 0                         | 80                  |               |     |      |      |                |                  |                       |            |                     |       |
| Cook et al, 2020         | 75                    | 3                         | 72                  | 9             | 6   |      |      |                |                  |                       |            |                     | 41    |
| Erdal et al, 2020        | 71                    | 0                         | 71                  | 18            | 17  |      |      |                |                  |                       |            |                     |       |
| Sun et al, 2020          | 67                    | 30                        | 37                  | 17            |     |      |      |                |                  |                       |            |                     | 9     |
| Booth et al, 2020        | 66                    | 0                         | 66                  |               | 3   |      |      |                |                  |                       | 28         | 4                   | 34    |
| Yarza et al, 2020        | 63                    | 0                         | 63                  | 0             | 0   |      |      |                |                  |                       |            |                     | 16    |
| Vuagnat et al, 2020      | 59                    | 31                        | 28                  | 4             | 1   |      |      |                |                  |                       | 45         | 10                  | 4     |
| Wang B et al, 2020       | 58                    | 22                        | 36                  | 7             | 5   |      |      |                |                  |                       | 22         | 1                   | 14    |
| Fox et al, 2020          | 55                    | 4                         | 51                  |               | 25  | 1    |      |                | 5                |                       | 35         | 1                   | 19    |
| Yang F et al, 2020       | 52                    | 0                         | 52                  |               | 0   | 1    |      |                |                  |                       | 41         |                     | 11    |
| Suleyman et al, 2020     | 49                    | 6                         | 43                  | 23            |     |      |      |                |                  |                       |            |                     | 19    |
| Rogado et al, 2020       | 45                    | 7                         | 38                  |               |     |      |      |                |                  |                       |            | 26                  | 19    |
| Sanchez-Pina et al, 2020 | 39                    | 5                         | 34                  | 1             |     |      |      |                |                  |                       |            |                     | 14    |
| Aries et al, 2020        | 35                    |                           |                     |               |     |      |      |                |                  |                       | 21         | 1                   | 14    |
| Martin-Moro et al, 2020  | 34                    | 0                         | 34                  | 2             | 4   |      |      |                |                  |                       |            | 5                   | 11    |

|                              | Cancer covid patients | Not hospitalised/ unknown | Number hospitalised | ICU admission | IMV | CRRT | ECMO | Haemo-dialysis | IV Vasopre-ssors | Transition to DNR/DNI | Discharged | Remain Hospitalised | Death |
|------------------------------|-----------------------|---------------------------|---------------------|---------------|-----|------|------|----------------|------------------|-----------------------|------------|---------------------|-------|
| Joharatnam-Hogan et al, 2020 | 30                    | 0                         | 30                  |               |     |      |      |                |                  |                       |            |                     | 11    |
| Zhang L et al, 2020          | 28                    | 0                         | 28                  | 6             | 12  |      |      |                |                  |                       | 10         |                     | 8     |
| Kalinsky et al, 2020         | 27                    | 20                        | 7                   |               |     |      |      |                |                  |                       | 26         | 0                   | 1     |
| Malard et al, 2020           | 25                    | 0                         | 25                  |               | 6   |      |      |                |                  |                       |            |                     | 9     |
| Stroppa et al, 2020          | 25                    | 0                         | 25                  | 1             |     |      |      |                |                  |                       |            |                     | 9     |
| Ciceri et al, 2020           | 22                    | 0                         | 22                  |               |     |      |      |                |                  |                       | 11         | 0                   | 11    |
| Bogani et al, 2020           | 19                    | 0                         | 19                  | 2             |     |      |      |                |                  |                       | 14         | 2                   | 3     |
| Liang et al, 2020            | 18                    | 0                         | 18                  | 7             |     |      |      |                |                  |                       |            |                     | 7     |
| Guan et al, 2020             | 18                    | 0                         | 18                  | 5             | 2   |      |      |                |                  |                       |            |                     | 3     |
| Tagliamento et al, 2020      | 17                    | 4                         | 13                  |               |     |      |      |                |                  |                       |            | 13                  | 4     |
| He et al, 2020               | 13                    | 0                         | 13                  |               | 1   |      |      |                |                  |                       |            | 0                   | 8     |
| Lattenist et al, 2020        | 13                    | 0                         | 13                  | 2             | 1   |      |      |                |                  |                       |            | 0                   | 6     |
| Yu et al, 2020               | 12                    | 0                         | 12                  |               |     |      |      |                |                  |                       | 9          | 3                   | 3     |
| Wu et al, 2020               | 11                    | 4                         | 7                   |               |     |      |      |                |                  |                       |            | 1                   | 4     |

**eTable 10** Patient outcomes in 68 studies.

CRRT, continuous renal-replacement therapy; DNR/DNI, do not resuscitate/do not intubate; ECMO, extracorporeal membrane oxygenation; ICU, intensive care unit; IMV, invasive mechanical ventilation.

| Publication      | Duration of hospital stay (days) |
|------------------|----------------------------------|
| Pinato et al     | 10 (IQR 5-18)                    |
| Passamonti et al | 16 (range 1-98)                  |
| Lunski et al     | 6 (IQR 3-15)                     |
| Song et al       | 22                               |
| Yang K et al     | 19 (IQR 12-33)                   |
| Garassino et al  | 12                               |
| Albiges et al    | 10 (range 1-40)                  |
| Lara et al       | 7 (IQR 4-10)                     |
| Dai et al*       | 27.01 (SD 9.52)                  |
| Singh et al      | 9.5 (range 1-27)                 |
| Erdal et al      | 10 (range 1-39)                  |
| Yarza et al*     | 9.2 (95% CI 8.17-10.33)          |
| Wang B et al     | 22                               |
| Fox et al        | 13 (range 0-135)                 |
| Zhang L et al    | 19 (IQR 16-28.5)                 |

**eTable 11.** Median duration of hospital stay (days).  
\*Mean duration.

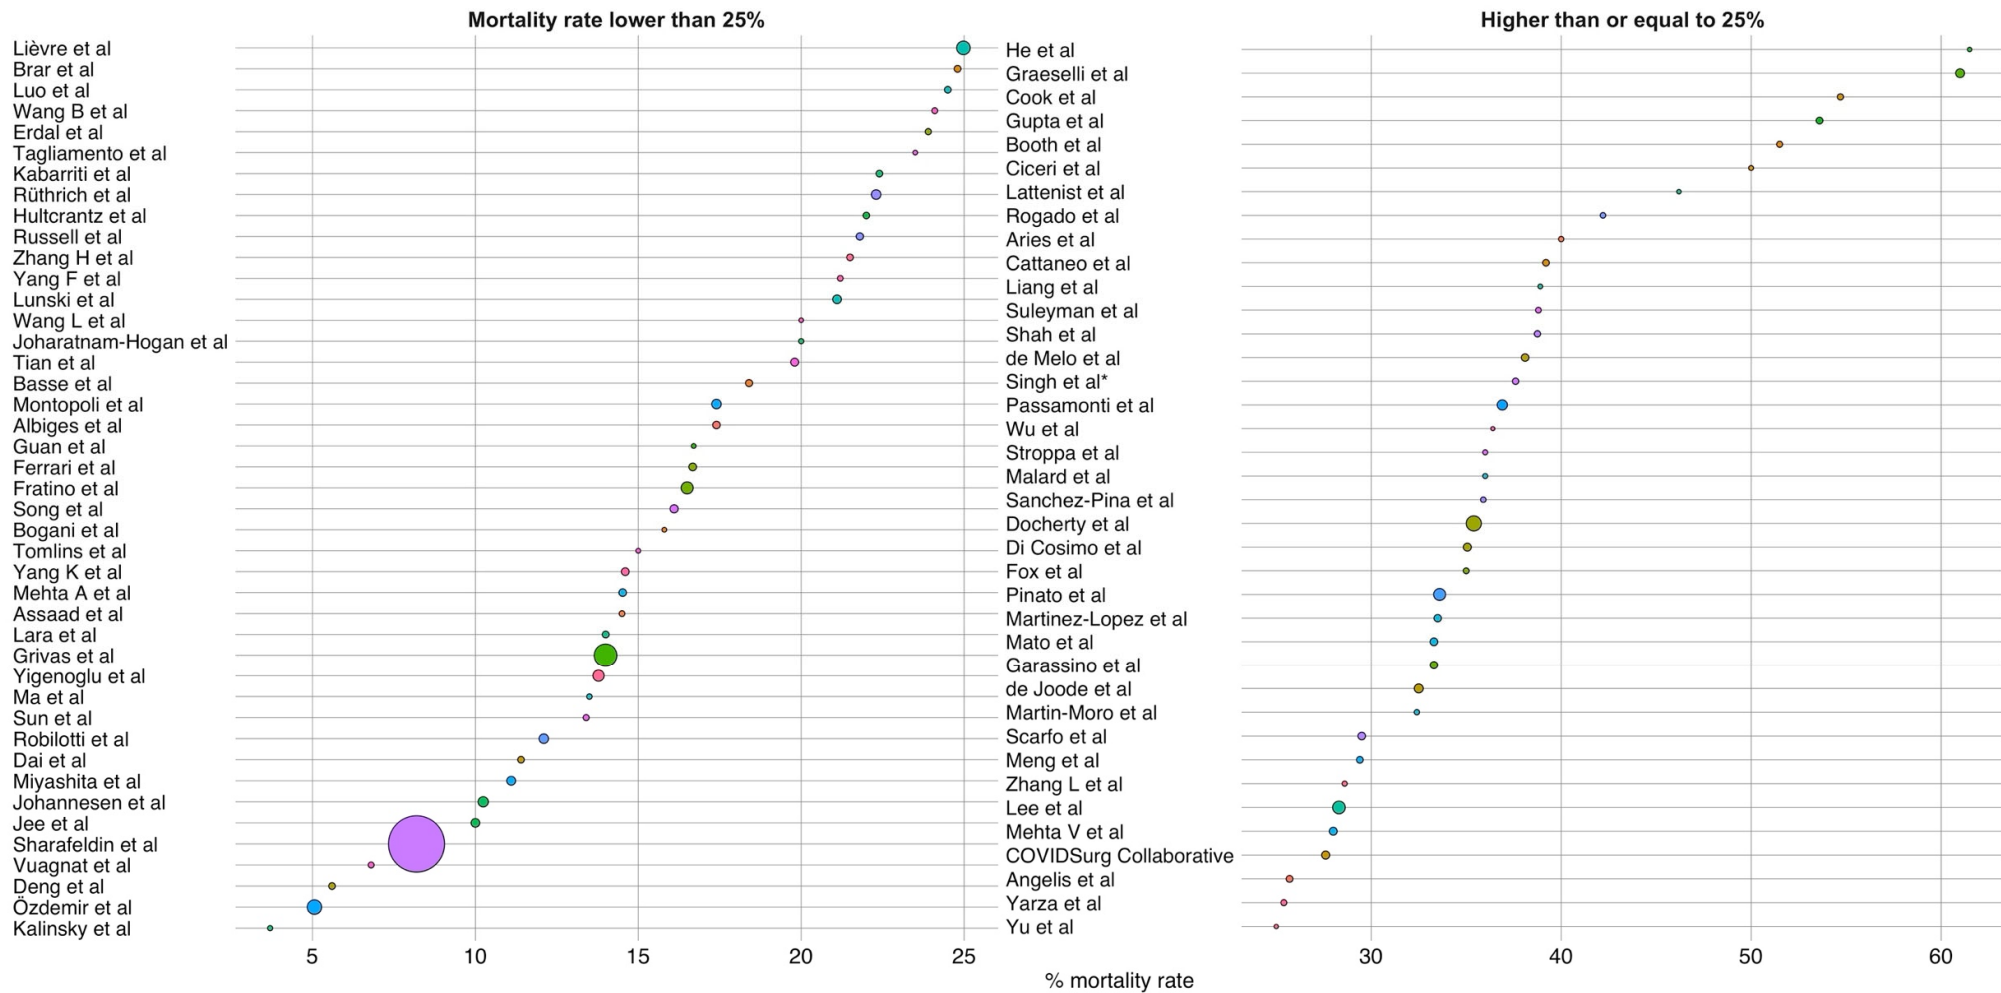

**eFigure 15** Mortality reported across 81 studies.



| Publication             | Mortality in those with cancer and COVID-19 | Cancer COVID patients | %      | Median follow up, days (range) |               |
|-------------------------|---------------------------------------------|-----------------------|--------|--------------------------------|---------------|
|                         |                                             |                       |        | Median                         | Mean          |
| Sharafeldin et al       | 3,164                                       | 38,614                | 8.19%  | -                              | -             |
| Grivas et al            | 695                                         | 4966                  | 14.0%  | 42 (22-90)                     | -             |
| Docherty et al          | 617                                         | 1743                  | 35.4%  | -                              | -             |
| Özdemir et al           | 77                                          | 1523                  | 5.06%  | 50 (1-74)                      | -             |
| Lièvre et al            | 322                                         | 1289                  | 24.98% | 34 (32-36)                     | -             |
| Lee et al               | 295                                         | 1044                  | 28.3%  | 6 (2-11)                       | -             |
| Fratino et al           | 150                                         | 909                   | 16.5%  | -                              | -             |
| Pinato et al            | 299                                         | 890                   | 33.6%  | -                              | 19 (+/- 16.3) |
| Yigenoglu et al         | 102                                         | 740                   | 13.78% | -                              | -             |
| Johannesen et al        | 56                                          | 547                   | 10.24% | -                              | -             |
| Passamonti et al        | 198                                         | 536                   | 36.9%  | 20 (10-34)                     | -             |
| Rüthrich et al          | 97                                          | 435                   | 22.30% | -                              | -             |
| Montopoli et al         | 75                                          | 430                   | 17.4%  | -                              | -             |
| Robilotti et al         | 51                                          | 423                   | 12.1%  | -                              | -             |
| de Joode et al          | 114                                         | 351                   | 32.5%  | -                              | -             |
| Miyashita et al         | 37                                          | 334                   | 11.1%  | -                              | -             |
| Graeselli et al         | 202                                         | 331                   | 61.0%  | 69 (60-78)                     | -             |
| Lunski et al            | 66                                          | 312                   | 21.1%  | -                              | -             |
| Jee et al               | 31                                          | 309                   | 10.0%  | -                              | -             |
| Song et al              | 40                                          | 248                   | 16.1%  | -                              | -             |
| COVIDSurg Collaborative | 66                                          | 239                   | 27.6%  | -                              | -             |
| Tian et al              | 46                                          | 232                   | 19.8%  | 29 (22-38)                     | -             |
| Di Cosimo et al         | 81                                          | 231                   | 35.06% | 138 (12-218)                   | -             |
| Mehta V et al           | 61                                          | 218                   | 28.0%  | -                              | -             |
| Yang K et al            | 30                                          | 205                   | 14.6%  | 68 (59-78)                     | -             |
| Ferrari et al           | 33                                          | 198                   | 16.67% | 61                             | -             |
| Garassino et al         | 66                                          | 198                   | 33.3%  | 15 (8-24)                      | -             |
| Mato et al              | 66                                          | 198                   | 33.3%  | 16 (1-43)                      | -             |
| Scarfo et al            | 56                                          | 190                   | 29.5%  | 23 (2-86)                      | -             |
| Mehta A et al           | 27                                          | 186                   | 14.52% | 63                             | -             |
| de Melo et al           | 69                                          | 181                   | 38.1%  | 5 (2-10.3)                     | -             |
| Albiges et al           | 31                                          | 178                   | 17.4%  | 23 (13-33)                     | -             |
| Martinez-Lopez et al    | 56                                          | 167                   | 33.5%  | -                              | -             |
| Russell et al           | 34                                          | 156                   | 21.8%  | 37 (18-49)                     | -             |
| Basse et al             | 26                                          | 141                   | 18.4%  | -                              | -             |
| Lara et al              | 17                                          | 121                   | 14.0%  | -                              | -             |
| Brar et al              | 29                                          | 117                   | 24.8%  | -                              | -             |
| Angelis et al           | 29                                          | 113                   | 25.7%  | -                              | -             |
| Gupta et al             | 60                                          | 112                   | 53.6%  | 16 (8-28)                      | -             |
| Meng et al              | 32                                          | 109                   | 29.4%  | -                              | -             |
| Deng et al              | 6                                           | 107                   | 5.6%   | -                              | -             |
| Kabarriti et al         | 24                                          | 107                   | 22.4%  | 7 ( 0.5-39)                    | -             |
| Zhang H et al           | 23                                          | 107                   | 21.5%  | -                              | -             |
| Dai et al               | 12                                          | 105                   | 11.4%  | -                              | -             |
| Luo et al               | 25                                          | 102                   | 24.5%  | 25 (10-36)                     | -             |
| Cattaneo et al          | 40                                          | 102                   | 39.2%  | -                              | -             |
| Hultcrantz et al        | 22                                          | 100                   | 22.0%  | -                              | -             |
| Singh et al*            | 32                                          | 85                    | 37.6%  | 31 (20-36)                     | -             |
| Shah et al              | 31                                          | 80                    | 38.8%  | -                              | -             |
| Cook et al              | 41                                          | 75                    | 54.7%  | -                              | -             |
| Erdal et al             | 17                                          | 71                    | 23.9%  | -                              | -             |
| Sun et al               | 9                                           | 67                    | 13.4%  | -                              | -             |
| Booth et al             | 34                                          | 66                    | 51.5%  | 32.5                           | -             |
| Yarza et al             | 16                                          | 63                    | 25.4%  | -                              | -             |

| Publication            | Mortality in those with cancer and COVID-19 | Cancer COVID patients | %     | Median follow (range)<br>Median | up, days<br>Mean |
|------------------------|---------------------------------------------|-----------------------|-------|---------------------------------|------------------|
| Vuagnat et al          | 4                                           | 59                    | 6.8%  | -                               |                  |
| Wang B et al           | 14                                          | 58                    | 24.1% | -                               |                  |
| Assaad et al           | 8                                           | 55                    | 14.5% | 25                              |                  |
| Fox et al              | 19                                          | 55                    | 35.0% | 27 (17-43)                      |                  |
| Yang F et al           | 11                                          | 52                    | 21.2% | -                               |                  |
| Suleyman et al         | 19                                          | 49                    | 38.8% | -                               |                  |
| Rogado et al           | 19                                          | 45                    | 42.2% | 14 (1-28)                       |                  |
| Sanchez-Pina et al     | 14                                          | 39                    | 35.9% | -                               |                  |
| Ma et al               | 5                                           | 37                    | 13.5% | -                               |                  |
| Aries et al            | 14                                          | 35                    | 40.0% | -                               |                  |
| Martin-Moro et al      | 11                                          | 34                    | 32.4% | 26                              |                  |
| Joharatnam-Hogan et al | 6                                           | 30                    | 20.0% | -                               |                  |
| Zhang L et al          | 8                                           | 28                    | 28.6% | -                               |                  |
| Kalinsky et al         | 1                                           | 27                    | 3.7%  | 26 (1-38)                       |                  |
| Malard et al           | 9                                           | 25                    | 36.0% | 29 (14-40)                      |                  |
| Stroppa et al          | 9                                           | 25                    | 36.0% | -                               |                  |
| Ciceri et al           | 11                                          | 22                    | 50.0% | 14 (7-25)                       |                  |
| Tomlins et al          | 3                                           | 20                    | 15.0% | -                               |                  |
| Bogani et al           | 3                                           | 19                    | 15.8% | -                               |                  |
| Liang et al            | 7                                           | 18                    | 38.9% | -                               |                  |
| Guan et al             | 3                                           | 18                    | 16.7% | 10 (8-14)                       |                  |
| Tagliamento et al      | 4                                           | 17                    | 23.5% | 15                              |                  |
| Wang L et al           | 3                                           | 15                    | 20.0% | -                               |                  |
| He et al               | 8                                           | 13                    | 61.5% | -                               |                  |
| Lattenist et al        | 6                                           | 13                    | 46.2% | -                               |                  |
| Yu et al               | 3                                           | 12                    | 25.0% | -                               |                  |
| Wu et al               | 4                                           | 11                    | 36.4% | -                               |                  |

**eTable 12** Mortality of cancer patients reported across studies.

\* Death defined mortality + transfer to hospice, not reported separately.

|                              | Admission to hospital | Supplemental O2 | Bilateral pneumonia with CURB-65 score $\geq 2$ /FiO2 $\geq 35\%$ | Admission to ICU | ICU/intubate/do not intubate | Mechanical ventilation | Invasive ventilation | ARDS | Septic shock | $\geq 1$ complication from COVID-19 <sup>1</sup> | Death | WHO Severity Scale <sup>2</sup> | National Health Commission of China definition <sup>3</sup> | Ministry of Health and Family Welfare definition <sup>4</sup> |
|------------------------------|-----------------------|-----------------|-------------------------------------------------------------------|------------------|------------------------------|------------------------|----------------------|------|--------------|--------------------------------------------------|-------|---------------------------------|-------------------------------------------------------------|---------------------------------------------------------------|
| Grivas et al, 2020           |                       |                 |                                                                   |                  |                              |                        |                      |      |              |                                                  |       |                                 |                                                             |                                                               |
| Docherty et al, 2020         |                       |                 |                                                                   |                  |                              |                        |                      |      |              |                                                  |       |                                 |                                                             |                                                               |
| Lee et al, 2020              |                       |                 |                                                                   |                  |                              |                        |                      |      |              |                                                  |       |                                 |                                                             |                                                               |
| Pinato et al, 2020           |                       |                 |                                                                   |                  |                              |                        |                      |      |              |                                                  |       |                                 |                                                             |                                                               |
| Yigenoglu et al, 2020        |                       |                 |                                                                   |                  |                              |                        |                      |      |              |                                                  |       |                                 |                                                             |                                                               |
| Passamonti et al, 2020       |                       |                 |                                                                   |                  |                              |                        |                      |      |              |                                                  |       |                                 |                                                             |                                                               |
| Montopoli et al, 2020        |                       |                 |                                                                   |                  |                              |                        |                      |      |              |                                                  |       |                                 |                                                             |                                                               |
| Robilotti et al, 2020        |                       |                 |                                                                   |                  |                              |                        |                      |      |              |                                                  |       |                                 |                                                             |                                                               |
| Jee et al, 2020              |                       |                 |                                                                   |                  |                              |                        |                      |      |              |                                                  |       |                                 |                                                             |                                                               |
| Tian et al, 2020             |                       |                 |                                                                   |                  |                              |                        |                      |      |              |                                                  |       |                                 |                                                             |                                                               |
| Mehta V et al, 2020          |                       |                 |                                                                   |                  |                              |                        |                      |      |              |                                                  |       |                                 |                                                             |                                                               |
| Yang K et al, 2020           |                       |                 |                                                                   |                  |                              |                        |                      |      |              |                                                  |       |                                 |                                                             |                                                               |
| Scarfo et al, 2020           |                       |                 |                                                                   |                  |                              |                        |                      |      |              |                                                  |       |                                 |                                                             |                                                               |
| Mehta A et al, 2020          |                       |                 |                                                                   |                  |                              |                        |                      |      |              |                                                  |       |                                 |                                                             |                                                               |
| Russell et al, 2020          |                       |                 |                                                                   |                  |                              |                        |                      |      |              |                                                  |       |                                 |                                                             |                                                               |
| Basse et al, 2020            |                       |                 |                                                                   |                  |                              |                        |                      |      |              |                                                  |       |                                 |                                                             |                                                               |
| Zhang H et al, 2020          |                       |                 |                                                                   |                  |                              |                        |                      |      |              |                                                  |       |                                 |                                                             |                                                               |
| Dai et al, 2020              |                       |                 |                                                                   |                  |                              |                        |                      |      |              |                                                  |       |                                 |                                                             |                                                               |
| Luo et al, 2020              |                       |                 |                                                                   |                  |                              |                        |                      |      |              |                                                  |       |                                 |                                                             |                                                               |
| Hulcrantz et al, 2020        |                       |                 |                                                                   |                  |                              |                        |                      |      |              |                                                  |       |                                 |                                                             |                                                               |
| Yarza et al, 2020            |                       |                 |                                                                   |                  |                              |                        |                      |      |              |                                                  |       |                                 |                                                             |                                                               |
| Vuagnat et al, 2020          |                       |                 |                                                                   |                  |                              |                        |                      |      |              |                                                  |       |                                 |                                                             |                                                               |
| Yang F et al, 2020           |                       |                 |                                                                   |                  |                              |                        |                      |      |              |                                                  |       |                                 |                                                             |                                                               |
| Rogado et al, 2020           |                       |                 |                                                                   |                  |                              |                        |                      |      |              |                                                  |       |                                 |                                                             |                                                               |
| Sanchez-Pina et al, 2020     |                       |                 |                                                                   |                  |                              |                        |                      |      |              |                                                  |       |                                 |                                                             |                                                               |
| Ma et al, 2020               |                       |                 |                                                                   |                  |                              |                        |                      |      |              |                                                  |       |                                 |                                                             |                                                               |
| Joharatnam-Hogan et al, 2020 |                       |                 |                                                                   |                  |                              |                        |                      |      |              |                                                  |       |                                 |                                                             |                                                               |
| Zhang L et al, 2020          |                       |                 |                                                                   |                  |                              |                        |                      |      |              |                                                  |       |                                 |                                                             |                                                               |
| Malard et al, 2020           |                       |                 |                                                                   |                  |                              |                        |                      |      |              |                                                  |       |                                 |                                                             |                                                               |
| Stroppa et al, 2020          |                       |                 |                                                                   |                  |                              |                        |                      |      |              |                                                  |       |                                 |                                                             |                                                               |
| Liang et al, 2020            |                       |                 |                                                                   |                  |                              |                        |                      |      |              |                                                  |       |                                 |                                                             |                                                               |
| Guan et al, 2020             |                       |                 |                                                                   |                  |                              |                        |                      |      |              |                                                  |       |                                 |                                                             |                                                               |
| Tagliamento et al, 2020      |                       |                 |                                                                   |                  |                              |                        |                      |      |              |                                                  |       |                                 |                                                             |                                                               |
| Wang L et al, 2020           |                       |                 |                                                                   |                  |                              |                        |                      |      |              |                                                  |       |                                 |                                                             |                                                               |
| He et al, 2020               |                       |                 |                                                                   |                  |                              |                        |                      |      |              |                                                  |       |                                 |                                                             |                                                               |
| Wu et al, 2020               |                       |                 |                                                                   |                  |                              |                        |                      |      |              |                                                  |       |                                 |                                                             |                                                               |

**eFigure 16** Definition of severe event.

<sup>1</sup>Complications include acute cardiac injury, ARDS, and septic shock. <sup>2</sup>Clinical signs of pneumonia (fever, cough, dyspnoea, fast breathing) plus one of the following: respiratory rate  $\geq 30$  breaths/min, severe respiratory distress; or SpO2  $< 90\%$  on room air. <sup>3</sup>Reparatory distress ( $\geq 30$  breaths/min), oxygen saturation  $\leq 93\%$  at rest, arterial partial pressure of oxygen (PaO2)/fraction of inspired oxygen (FiO2)  $\leq 300$  mmHg. ARDS: Acute Respiratory Distress Syndrome; ICU, intensive care unit.

## Significant variables associated with different outcomes\* in univariate studies

Number of studies that found a variable to be significant, not significant or favourable in relation to an outcome, across 66 studies

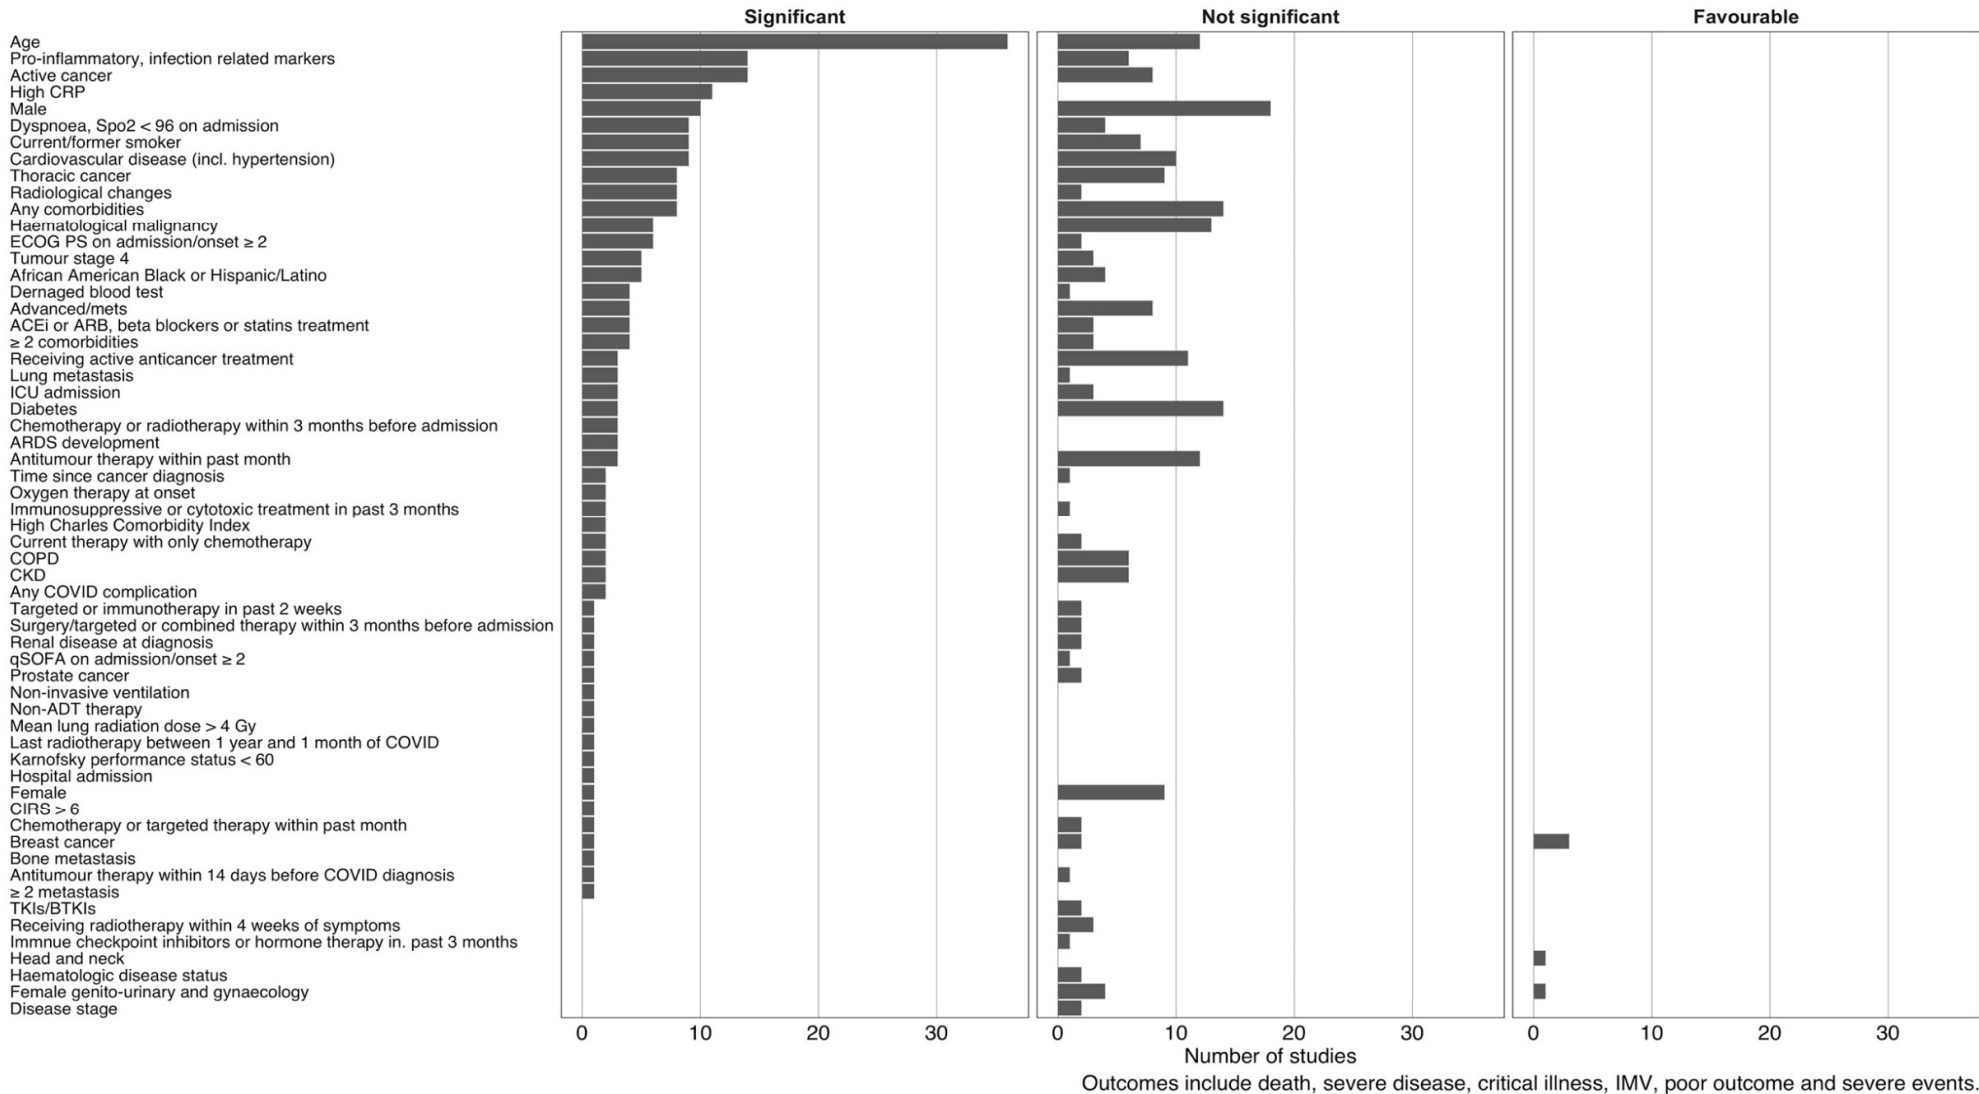

**eFigure 17.** Significant Variables in Unadjusted (A) and Adjusted (B) Analyses Across Studies

ACEi, angiotensin converting enzyme inhibitor; ARB, angiotensin II receptor blocker; ARDS, acute respiratory distress syndrome; CIRS, cumulative illness rating score; CT, computerised tomography; ECOG, Eastern Cooperative Oncology Group; ICU, intensive care unit; PS, performance status; VTED, venous thromboembolic disease.

## Significant variables associated with different outcomes\* in multivariate studies

Number of studies that found a variable to be significant or not significant in relation to an outcome, across 49 studies

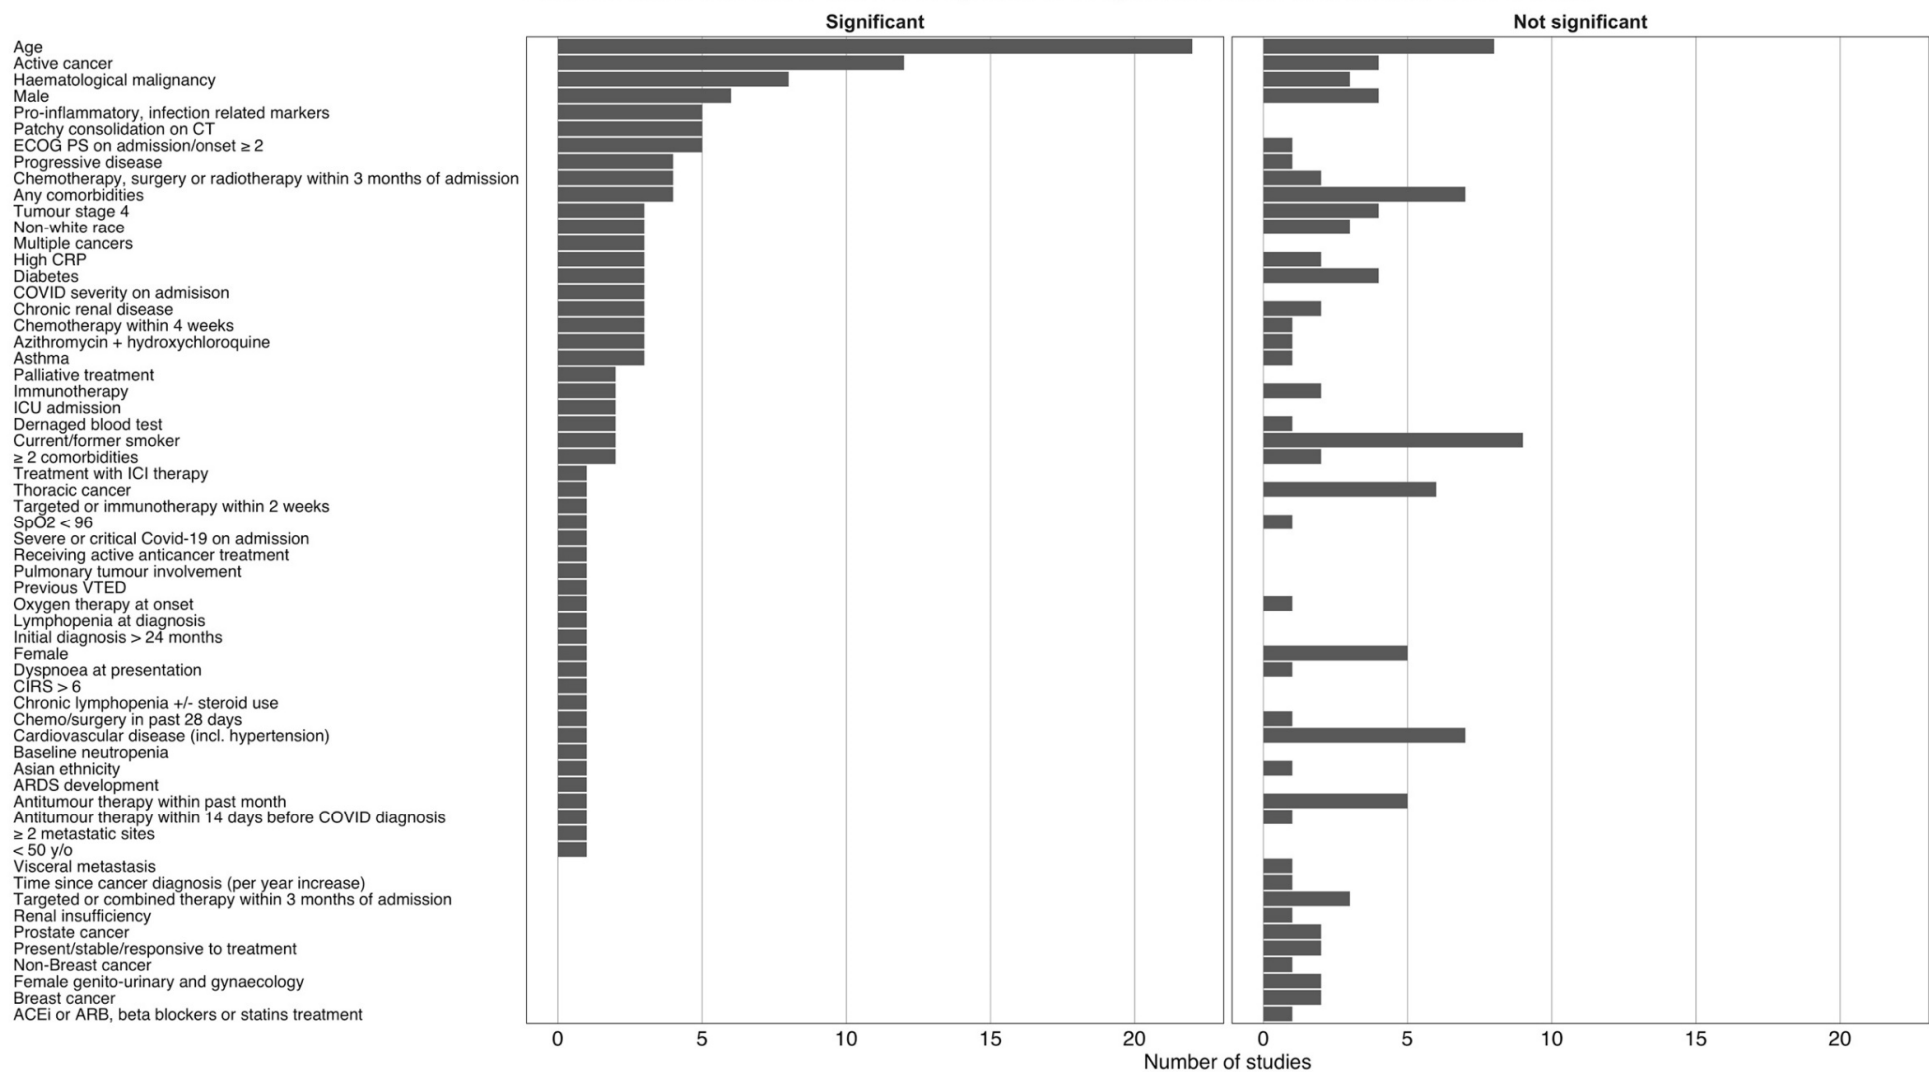

Outcomes include death, severe disease, critical illness, IMV, poor outcome and severe events.

### eFigure 17. Continued

ACEi, angiotensin converting enzyme inhibitor; ARB, angiotensin II receptor blocker; ARDS, acute respiratory distress syndrome; CIRS, cumulative illness rating score; CT, computerised tomography; ECOG, Eastern Cooperative Oncology Group; ICU, intensive care unit; PS, performance status; VTED, venous thromboembolic disease

|                         | Age | Gender | Race | BMI | Deprivation Index | Smoking status (former vs never smoked) | Co-morbidities | Chronic lymphopenia or corticosteroids | Medications * | ECOG performance | Cancer type | Tumour stage | Tumour status | Time since cancer diagnosis | Line of treatment | Therapeutic intent | Antitumour treatments | Time from malignancy to COVID-19 diagnosis | Radiological changes associated with COVID-19 | Pro-inflammatory blood markers | Pulmonary involvement | Pre-admission characteristics | COVID-19 severity (including ARDS development) | Treatment with azithromycin or hydroxychloroquine | Immunotherapy or surgery | Active chemotherapy/immunosuppressive therapy |  |
|-------------------------|-----|--------|------|-----|-------------------|-----------------------------------------|----------------|----------------------------------------|---------------|------------------|-------------|--------------|---------------|-----------------------------|-------------------|--------------------|-----------------------|--------------------------------------------|-----------------------------------------------|--------------------------------|-----------------------|-------------------------------|------------------------------------------------|---------------------------------------------------|--------------------------|-----------------------------------------------|--|
| Sharafeldin et al       |     |        |      |     |                   |                                         |                |                                        |               |                  |             |              |               |                             |                   |                    |                       |                                            |                                               |                                |                       |                               |                                                |                                                   |                          |                                               |  |
| Docherty et al          |     |        |      |     |                   |                                         |                |                                        |               |                  |             |              |               |                             |                   |                    |                       |                                            |                                               |                                |                       |                               |                                                |                                                   |                          |                                               |  |
| Lee et al               |     |        |      |     |                   |                                         |                |                                        |               |                  |             |              |               |                             |                   |                    |                       |                                            |                                               |                                |                       |                               |                                                |                                                   |                          |                                               |  |
| Grivas et al            |     |        |      |     |                   |                                         |                |                                        |               |                  |             |              |               |                             |                   |                    |                       |                                            |                                               |                                |                       |                               |                                                |                                                   |                          |                                               |  |
| Pinato et al            |     |        |      |     |                   |                                         |                |                                        |               |                  |             |              |               |                             |                   |                    |                       |                                            |                                               |                                |                       |                               |                                                |                                                   |                          |                                               |  |
| Passamonti et al        |     |        |      |     |                   |                                         |                |                                        |               |                  |             |              |               |                             |                   |                    |                       |                                            |                                               |                                |                       |                               |                                                |                                                   |                          |                                               |  |
| Robilotti et al         |     |        |      |     |                   |                                         |                |                                        |               |                  |             |              |               |                             |                   |                    |                       |                                            |                                               |                                |                       |                               |                                                |                                                   |                          |                                               |  |
| Miyashita et al         |     |        |      |     |                   |                                         |                |                                        |               |                  |             |              |               |                             |                   |                    |                       |                                            |                                               |                                |                       |                               |                                                |                                                   |                          |                                               |  |
| Graeselli et al         |     |        |      |     |                   |                                         |                |                                        |               |                  |             |              |               |                             |                   |                    |                       |                                            |                                               |                                |                       |                               |                                                |                                                   |                          |                                               |  |
| Lunski et al            |     |        |      |     |                   |                                         |                |                                        |               |                  |             |              |               |                             |                   |                    |                       |                                            |                                               |                                |                       |                               |                                                |                                                   |                          |                                               |  |
| Jee et al               |     |        |      |     |                   |                                         |                |                                        |               |                  |             |              |               |                             |                   |                    |                       |                                            |                                               |                                |                       |                               |                                                |                                                   |                          |                                               |  |
| Song et al -            |     |        |      |     |                   |                                         |                |                                        |               |                  |             |              |               |                             |                   |                    |                       |                                            |                                               |                                |                       |                               |                                                |                                                   |                          |                                               |  |
| COVIDSurg Collaborative |     |        |      |     |                   |                                         |                |                                        |               |                  |             |              |               |                             |                   |                    |                       |                                            |                                               |                                |                       |                               |                                                |                                                   |                          |                                               |  |
| Tian et al              |     |        |      |     |                   |                                         |                |                                        |               |                  |             |              |               |                             |                   |                    |                       |                                            |                                               |                                |                       |                               |                                                |                                                   |                          |                                               |  |
| Mehta et al             |     |        |      |     |                   |                                         |                |                                        |               |                  |             |              |               |                             |                   |                    |                       |                                            |                                               |                                |                       |                               |                                                |                                                   |                          |                                               |  |
| Yang K et al            |     |        |      |     |                   |                                         |                |                                        |               |                  |             |              |               |                             |                   |                    |                       |                                            |                                               |                                |                       |                               |                                                |                                                   |                          |                                               |  |
| Garassino et al         |     |        |      |     |                   |                                         |                |                                        |               |                  |             |              |               |                             |                   |                    |                       |                                            |                                               |                                |                       |                               |                                                |                                                   |                          |                                               |  |
| Mato et al              |     |        |      |     |                   |                                         |                |                                        |               |                  |             |              |               |                             |                   |                    |                       |                                            |                                               |                                |                       |                               |                                                |                                                   |                          |                                               |  |
| Martinez-Lopez et al    |     |        |      |     |                   |                                         |                |                                        |               |                  |             |              |               |                             |                   |                    |                       |                                            |                                               |                                |                       |                               |                                                |                                                   |                          |                                               |  |
| Russell et al           |     |        |      |     |                   |                                         |                |                                        |               |                  |             |              |               |                             |                   |                    |                       |                                            |                                               |                                |                       |                               |                                                |                                                   |                          |                                               |  |
| Basse et al             |     |        |      |     |                   |                                         |                |                                        |               |                  |             |              |               |                             |                   |                    |                       |                                            |                                               |                                |                       |                               |                                                |                                                   |                          |                                               |  |
| Lara et al              |     |        |      |     |                   |                                         |                |                                        |               |                  |             |              |               |                             |                   |                    |                       |                                            |                                               |                                |                       |                               |                                                |                                                   |                          |                                               |  |
| Angelis et al           |     |        |      |     |                   |                                         |                |                                        |               |                  |             |              |               |                             |                   |                    |                       |                                            |                                               |                                |                       |                               |                                                |                                                   |                          |                                               |  |
| Gupta et al             |     |        |      |     |                   |                                         |                |                                        |               |                  |             |              |               |                             |                   |                    |                       |                                            |                                               |                                |                       |                               |                                                |                                                   |                          |                                               |  |
| Zhang H et al           |     |        |      |     |                   |                                         |                |                                        |               |                  |             |              |               |                             |                   |                    |                       |                                            |                                               |                                |                       |                               |                                                |                                                   |                          |                                               |  |
| Dai et al               |     |        |      |     |                   |                                         |                |                                        |               |                  |             |              |               |                             |                   |                    |                       |                                            |                                               |                                |                       |                               |                                                |                                                   |                          |                                               |  |
| Cattaneo                |     |        |      |     |                   |                                         |                |                                        |               |                  |             |              |               |                             |                   |                    |                       |                                            |                                               |                                |                       |                               |                                                |                                                   |                          |                                               |  |
| Singh et al             |     |        |      |     |                   |                                         |                |                                        |               |                  |             |              |               |                             |                   |                    |                       |                                            |                                               |                                |                       |                               |                                                |                                                   |                          |                                               |  |
| Yarza et al             |     |        |      |     |                   |                                         |                |                                        |               |                  |             |              |               |                             |                   |                    |                       |                                            |                                               |                                |                       |                               |                                                |                                                   |                          |                                               |  |
| Suleyman et al          |     |        |      |     |                   |                                         |                |                                        |               |                  |             |              |               |                             |                   |                    |                       |                                            |                                               |                                |                       |                               |                                                |                                                   |                          |                                               |  |
| Rogado et al            |     |        |      |     |                   |                                         |                |                                        |               |                  |             |              |               |                             |                   |                    |                       |                                            |                                               |                                |                       |                               |                                                |                                                   |                          |                                               |  |
| Sanchez-Pina et al      |     |        |      |     |                   |                                         |                |                                        |               |                  |             |              |               |                             |                   |                    |                       |                                            |                                               |                                |                       |                               |                                                |                                                   |                          |                                               |  |
| Martin-Moro et al       |     |        |      |     |                   |                                         |                |                                        |               |                  |             |              |               |                             |                   |                    |                       |                                            |                                               |                                |                       |                               |                                                |                                                   |                          |                                               |  |
| Zhang L et al           |     |        |      |     |                   |                                         |                |                                        |               |                  |             |              |               |                             |                   |                    |                       |                                            |                                               |                                |                       |                               |                                                |                                                   |                          |                                               |  |
| Ciceri et al            |     |        |      |     |                   |                                         |                |                                        |               |                  |             |              |               |                             |                   |                    |                       |                                            |                                               |                                |                       |                               |                                                |                                                   |                          |                                               |  |
| Liang et al             |     |        |      |     |                   |                                         |                |                                        |               |                  |             |              |               |                             |                   |                    |                       |                                            |                                               |                                |                       |                               |                                                |                                                   |                          |                                               |  |
| Guan et al              |     |        |      |     |                   |                                         |                |                                        |               |                  |             |              |               |                             |                   |                    |                       |                                            |                                               |                                |                       |                               |                                                |                                                   |                          |                                               |  |
| Wang L et al            |     |        |      |     |                   |                                         |                |                                        |               |                  |             |              |               |                             |                   |                    |                       |                                            |                                               |                                |                       |                               |                                                |                                                   |                          |                                               |  |

**eFigure 18** Variables included in adjusted analysis across studies.

**A**

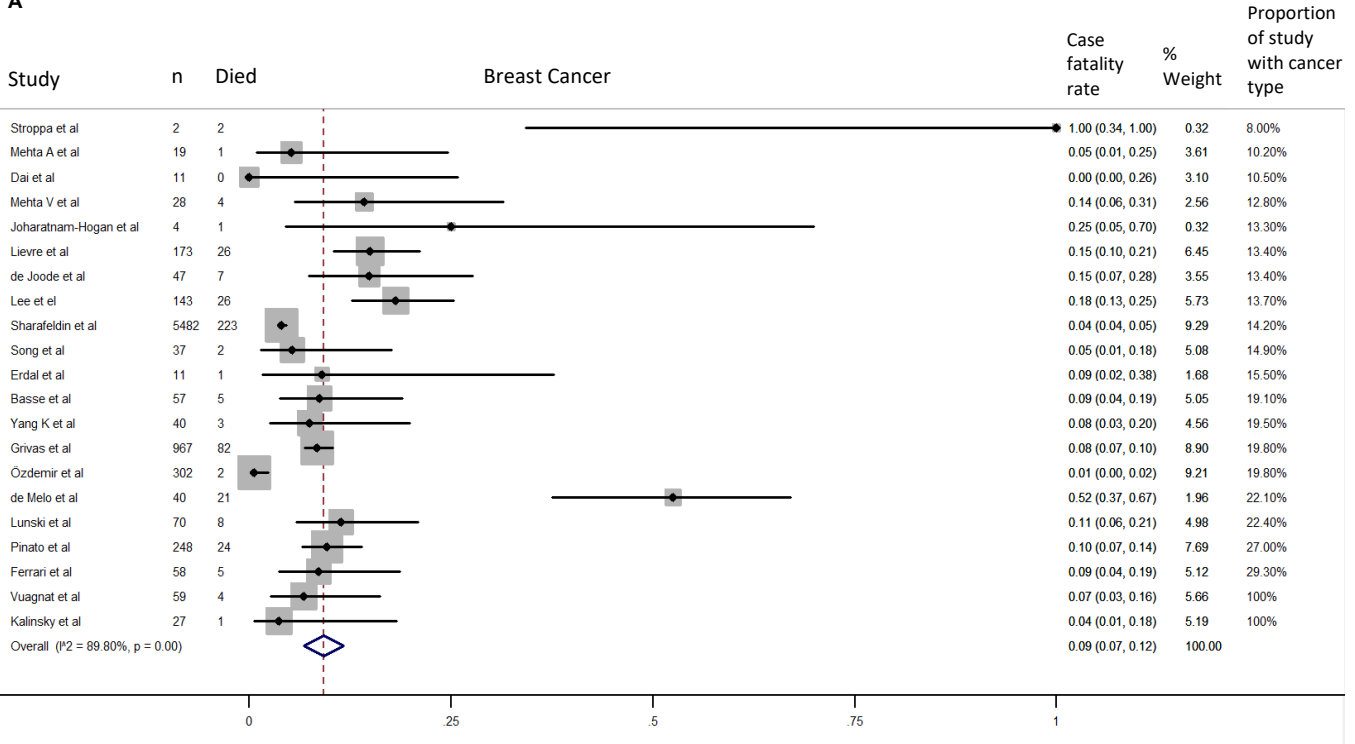

**B**

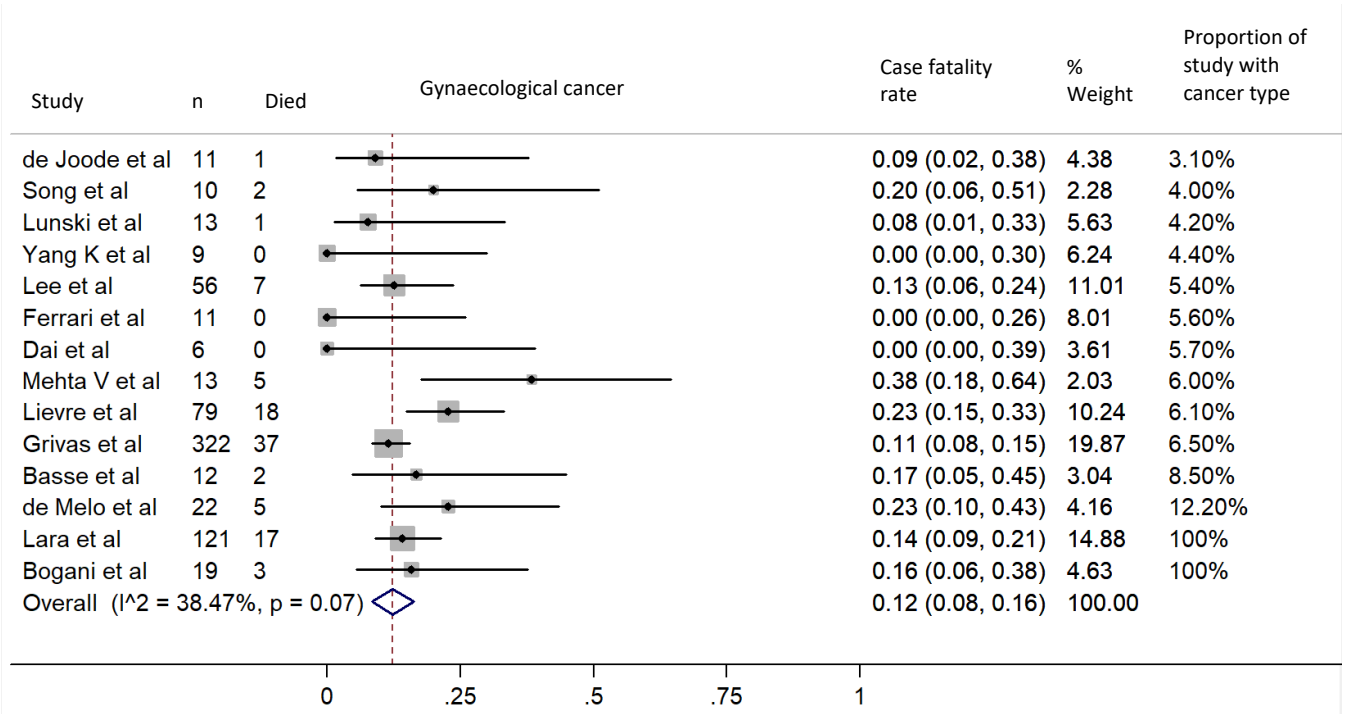

**C**

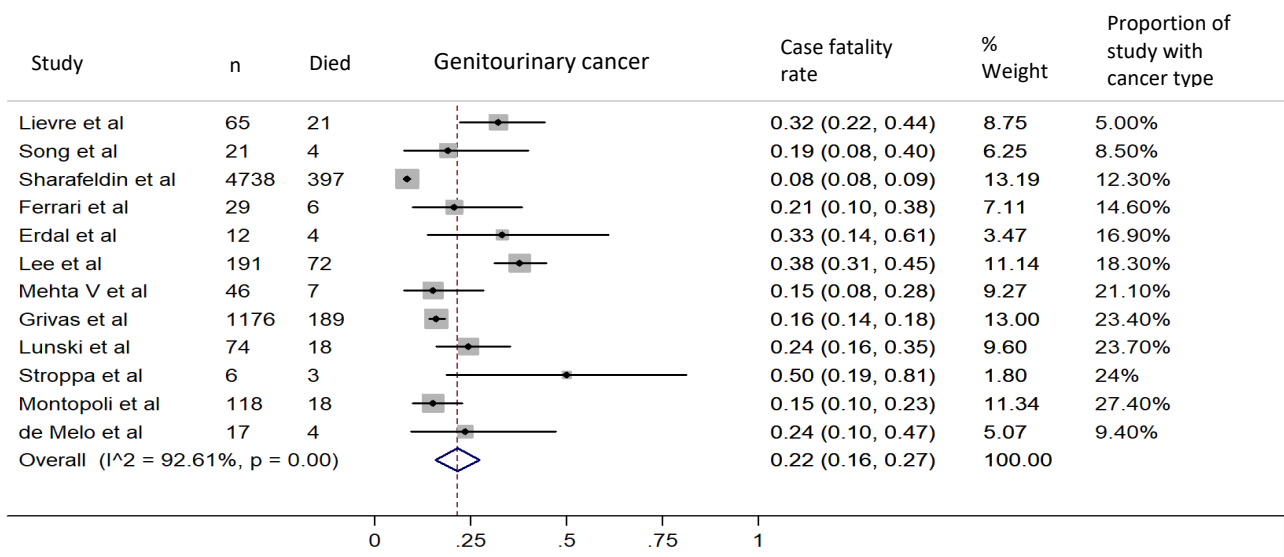

**D**

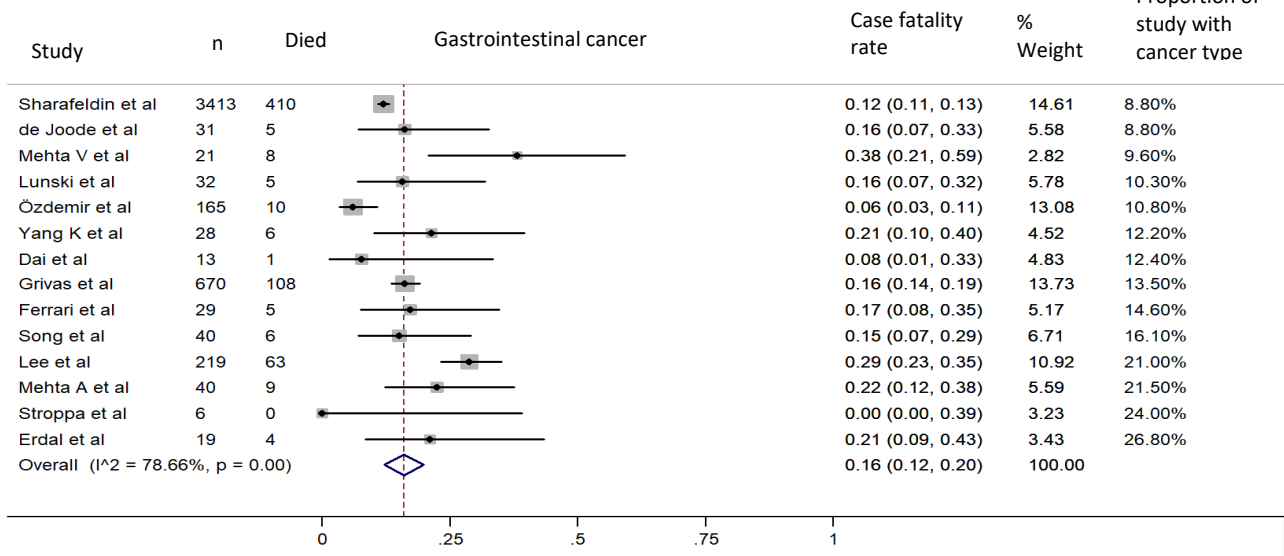

**E**

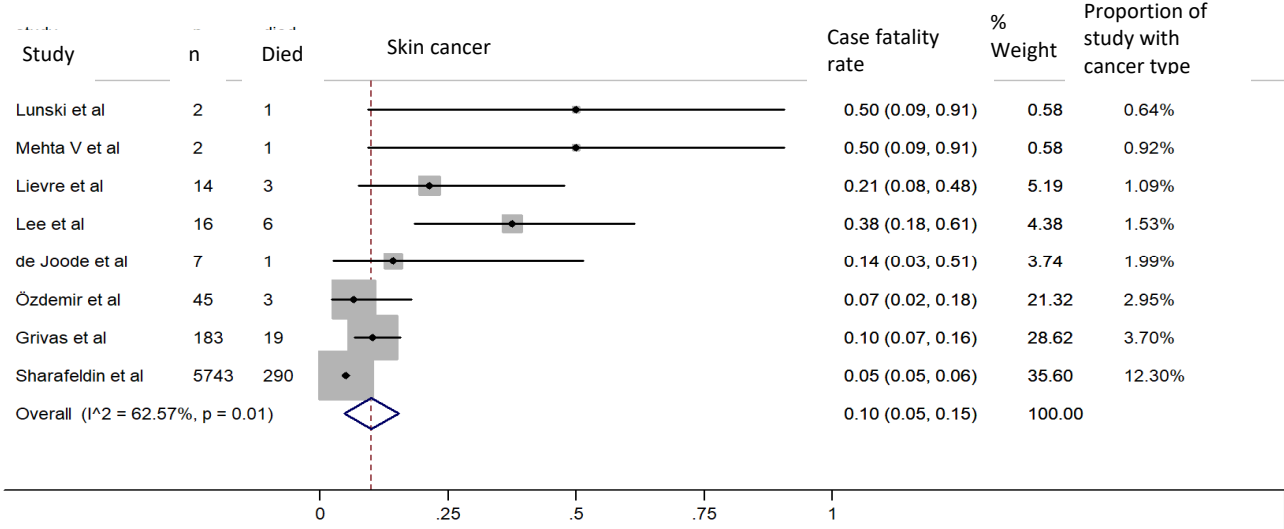



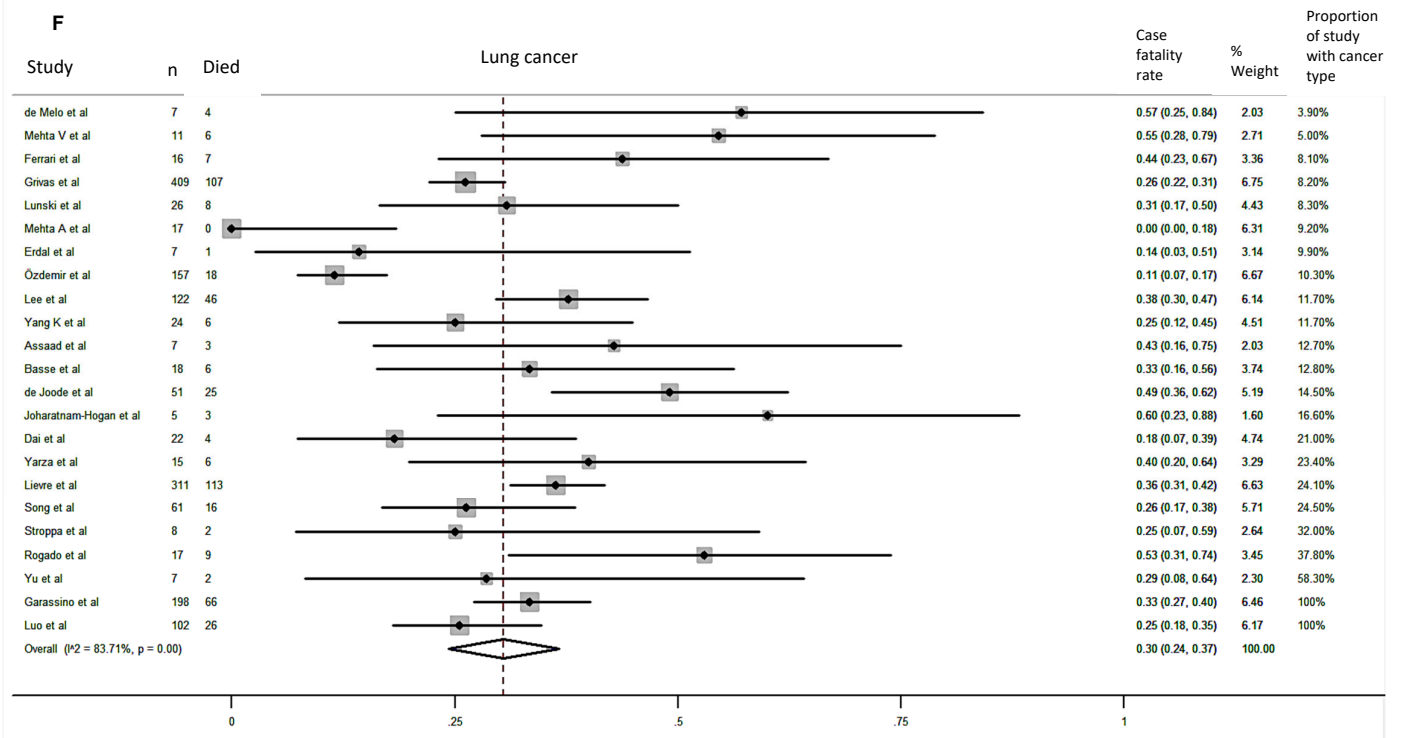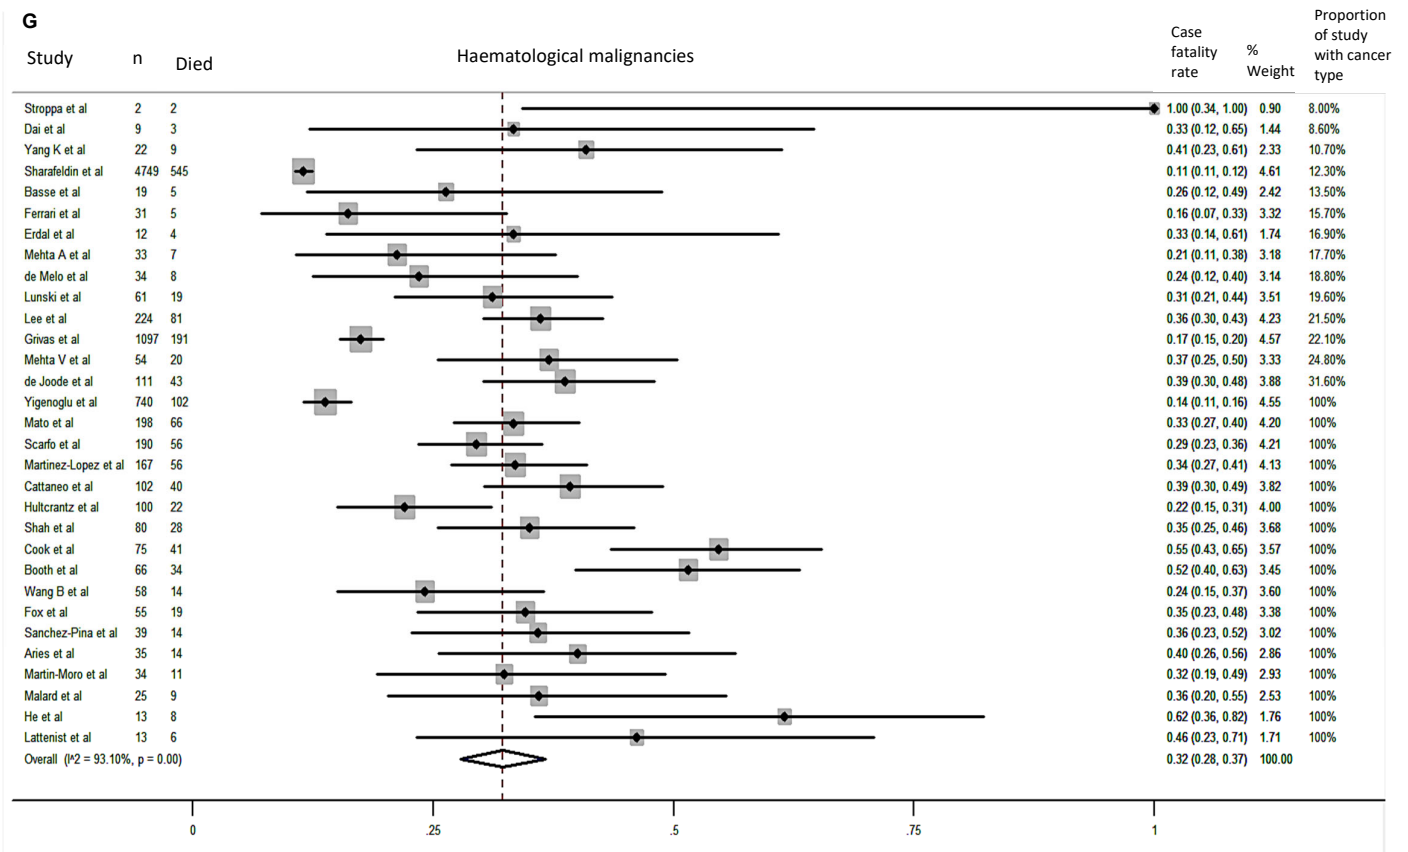

**eFigure 19** Forest plot of overall pooled case fatality in subgroup analysis  
Case fatality in different cancer types: A) Breast cancer, B) Gynaecological cancer, C) Genitourinary cancer, D) Gastrointestinal cancer, E) Skin cancer, F) Lung cancer, and G) Haematological malignancies.

| Type of cancer treatment | Number of studies included in analysis | Number of patients included across studies (range) | Pooled case fatality rate |
|--------------------------|----------------------------------------|----------------------------------------------------|---------------------------|
| Surgery                  | 7                                      | 4 to 56                                            | 19%                       |
| Chemotherapy             | 22                                     | 3 to 802                                           | 31%                       |
| Endocrine                | 9                                      | 4 to 483                                           | 11%                       |
| Immunotherapy            | 14                                     | 3 to 248                                           | 22%                       |
| Radiotherapy             | 9                                      | 2 to 95                                            | 20%                       |
| Targeted therapy         | 15                                     | 1 to 693                                           | 18%                       |

**eTable 13** Pooled case fatality rates for various cancer treatments.

| Name of Study                                                                                                | Trial or Registration Number | Location | Number of patients and patient characteristics | Primary endpoint                                                                                                                                                                                                                                                                                                                                                                                |
|--------------------------------------------------------------------------------------------------------------|------------------------------|----------|------------------------------------------------|-------------------------------------------------------------------------------------------------------------------------------------------------------------------------------------------------------------------------------------------------------------------------------------------------------------------------------------------------------------------------------------------------|
| CovidSurg – Cancer                                                                                           | NCT04384926                  | Global   | 1000 patients planned for cancer surgery       | 30-day postoperative COVID-19 infection rate.<br><a href="https://globalsurg.org/cancercovidsurg/">https://globalsurg.org/cancercovidsurg/</a>                                                                                                                                                                                                                                                  |
| COVID-19 and Cancer Consortium Registry (CCC19)                                                              | NCT04354701                  | Global   | 10,000 patients                                | Collect data about cancer patients who have been infected with COVID-19 via web-based REDCap Survey.<br><br><a href="https://ccc19.org/">https://ccc19.org/</a>                                                                                                                                                                                                                                 |
| American Society of Haematology Research Collaborative (ASH RC) COVID-19 Registry for Hematologic Malignancy | -                            | Global   | -                                              | Captures data on patients with COVID-19 and have been or are currently being treated for hematologic malignancy.<br><a href="https://www.ashresearchcollaborative.org/covid-19-registry">https://www.ashresearchcollaborative.org/covid-19-registry</a>                                                                                                                                         |
| ASCO Survey on COVID-19 in Oncology (ASCO) Registry                                                          | NCT04659135                  | USA      | 2000 patients                                  | Changes to Cancer Treatments.                                                                                                                                                                                                                                                                                                                                                                   |
| Thoracic cancers international COVID-19 collaboration (TERAVOLT)                                             | -                            | Global   | -                                              | A global consortium designed to gather information on patients with thoracic cancer infected with COVID-19 regardless of therapies administered.<br><a href="http://www.etop-eu.org/index.php?option=com_content&amp;view=article&amp;id=115644&amp;catid=13&amp;Itemid=557">http://www.etop-eu.org/index.php?option=com_content&amp;view=article&amp;id=115644&amp;catid=13&amp;Itemid=557</a> |
| Clinical Characterisation Protocol-Cancer-UK                                                                 | NCT04603105                  | UK       | 9000 patients                                  | To determine the COVID-19 fatality rate overall in the cancer population using the most up to date dataset from the first wave as well as to determine the COVID-19 fatality rate in different tumour types.<br><a href="https://isaric.tghn.org/UK-CCP">https://isaric.tghn.org/UK-CCP</a> .                                                                                                   |
| UK Coronavirus Cancer Monitoring Project                                                                     | -                            | UK       | -                                              | The UK Coronavirus cancer monitoring scheme is a clinician-led reporting project recoding data related to cancer patients who have tested positive for COVID-19 across the UK.<br><a href="https://ukcoronaviruscancermonitoring.com/">https://ukcoronaviruscancermonitoring.com/</a>                                                                                                           |

| Name of Study                                                                                                                                         | Trial or Registration Number | Location | Number of patients and patient characteristics            | Primary endpoint                                                                                                                                                                                                                                                                       |
|-------------------------------------------------------------------------------------------------------------------------------------------------------|------------------------------|----------|-----------------------------------------------------------|----------------------------------------------------------------------------------------------------------------------------------------------------------------------------------------------------------------------------------------------------------------------------------------|
| ONCOVID:                                                                                                                                              | NCT04393974                  | UK       | 1000 patients                                             | Describe presenting characteristics and severity of SARS-CoV-2 infection in patients with cancer. To assess what factors are involved in prognosis of cancer patients with COVID-19.<br><a href="https://www.oncovid.net/">https://www.oncovid.net/</a>                                |
| Prospective Analysis of Morbidity of Patients With Cancers in Active Phase of Treatment Suspected or Diagnosed of a SARS-CoV-2 Infection (ONCOVID-19) | NCT04363632                  | France   | 1231 patients                                             | Mortality of cancer patients under active anticancer treatment.                                                                                                                                                                                                                        |
| UK Covid and gynaecological cancer study (UKCOGS-UK)                                                                                                  | -                            | UK       | -                                                         | Evaluate the MDT decision making for gynaecological cancer, patient outcomes across the UK in response to the COVID-19 pandemic.<br><a href="mailto:bb-ukcogs@gmul.ac.uk">bb-ukcogs@gmul.ac.uk</a>                                                                                     |
| PACE: Patients with AML and COVID-19 Epidemiology                                                                                                     | 282870 (IRAS ID)             | UK       | 100 patients with AML                                     | Record how many patients have had COVID-19 previously, have an active infection or go on to develop COVID-19 whilst receiving treatment for their AML.                                                                                                                                 |
| Covid-19 in Hematological Malignancies (EPICOVIDEHA)                                                                                                  | NCT04733729                  | Italy    | 3000 patients with haematological malignancies            | Epidemiology of COVID-19 infection in patients with haematological malignancies                                                                                                                                                                                                        |
| Screening and Identification of SARS-CoV-2 Infection and Progression in Cancer Patients Based on Bioinformatics Analysis                              | ChiCTR2000030807             | China    | 100 patients.                                             | Clinical characteristics and prognosis of cancer patients with novel coronavirus pneumonia (COVID-19) based on bioinformatics analysis.<br><a href="http://www.chictr.org.cn/showproj.aspx?proj=51019">http://www.chictr.org.cn/showproj.aspx?proj=51019</a>                           |
| COVID-19 Infection and Multiple Myeloma (EMN-COVID)                                                                                                   | NCT04492371                  | Global   | 500 patients with multiple myeloma and COVID-19 infection | Nature of COVID-19, costs related to COVID-19, systemic anti-cancer therapy subgroup, laboratory values collected at hospitalization, COVID-19 infection in myeloma patient subgroups, incidence of COVID-19 infection in frail patients and infection outcome in different countries. |

| Name of Study                                                                                                 | Trial or Registration Number | Location | Number of patients and patient characteristics                       | Primary endpoint                                                                                                                                                                                                                                                            |
|---------------------------------------------------------------------------------------------------------------|------------------------------|----------|----------------------------------------------------------------------|-----------------------------------------------------------------------------------------------------------------------------------------------------------------------------------------------------------------------------------------------------------------------------|
| LunG and Melanoma cancer Patients with COVID-19 Disease (GRAVID)                                              | NCT04344002                  | Spain    | 200 patients with lung cancer and COVID-19                           | Clinical data of lung cancer patients with COVID-19 diagnoses, diagnosis data, treatments received and prognostic factors.                                                                                                                                                  |
| COVID-19 Infection in Cancer Patients (COICA)                                                                 | NCT04569292                  | Italy    | 150 patients                                                         | Describe cancer patients with COVID-19 and their clinical course                                                                                                                                                                                                            |
| Registry on NEN Patients and COVID-19                                                                         | NCT04444401                  | Italy    | 50 patients with neuroendocrine tumours                              | Correlation between clinical parameters and SARS-CoV-2 infection as well as clinical outcome of SARS-CoV-2 Infection                                                                                                                                                        |
| Effects of COVID-19 Pandemic on the Diagnosis and Outcomes of Colorectal Cancer (COVID-CRC) (COVID-CRC)       | NCT04712292                  | Italy    | 2000 patients                                                        | Oncologic stage according to TNM classification.                                                                                                                                                                                                                            |
| NCI COVID-19 in Cancer Patients, NCCAPS Study                                                                 | NCT04387656                  | Global   | 2000 patients                                                        | Patient variables (factors) associated with severe acute respiratory syndrome (SARS) coronavirus 2 (COVID-19) severity, effects of COVID-19 on cancer therapy and association with clinical outcomes and physical health (patient-reported health-related quality of life). |
| Prospective Determination of COVID-19 Infection Rate in a Chemotherapy Unit in Mexico                         | NCT04567979                  | Mexico   | 149 patients with solid malignant disease and healthcare workers     | SARS-CoV-2 infection rate in patients with solid tumours.                                                                                                                                                                                                                   |
| A Study of Risk Factors for the COVID-19 Virus Infection                                                      | NCT04697927                  | USA      | 10,000 patients                                                      | To develop a comprehensive registry database.                                                                                                                                                                                                                               |
| Registry of Patients With Hematologic Disease and COVID-19 in Russia (CHRONOS19)                              | NCT04422470                  | Russia   | 200 patients with malignant and non-malignant haematological disease | 30-day all-cause mortality                                                                                                                                                                                                                                                  |
| Long-term Evolution of Pulmonary Involvement of Novel SARS-COV-2 Infection (COVID-19): Follow the Covid Study | NCT04605757                  | Italy    | 100 patients                                                         | Long term evolution of clinical involvement due to SARS-COV-2 pneumonia / symptoms, respiratory rate, blood gas exchange parameters, pulmonary function tests, organ involvement.                                                                                           |

| <b>Name of Study</b>                                                                                                                               | <b>Trial or Registration Number</b> | <b>Location</b> | <b>Number of patients and patient characteristics</b>                   | <b>Primary endpoint</b>                                                                                                                                                                                                                         |
|----------------------------------------------------------------------------------------------------------------------------------------------------|-------------------------------------|-----------------|-------------------------------------------------------------------------|-------------------------------------------------------------------------------------------------------------------------------------------------------------------------------------------------------------------------------------------------|
| Outcome of cancer patients infected with COVID-19, including toxicity of cancer treatments                                                         | -                                   | France          | 7,251 patients                                                          | Clinical deterioration, defined as the need for O2 supplementation of 6l/min or more, or death of any cause.                                                                                                                                    |
| Incidence of thrombosis and hemorrhage in hospitalized cancer patients with COVID-19                                                               | -                                   | USA             | 45 cancer patients and 353 non cancer patients                          | Evaluate cumulative incidences of thrombotic and hemorrhagic events in hospitalized COVID-19 patients with and without active cancer at 28 days.                                                                                                |
| Poor outcome and prolonged persistence of SARS-CoV-2 RNA in COVID-19 patients with haematological malignancies; King's College Hospital experience | -                                   | UK              | 80 patients                                                             | Comparison of first 80 patients with haematological malignancy with all other patients admitted to our hospital with COVID-19 in the same time frame to define relative risk and identify factors that increase mortality within this subgroup. |
| Nosocomial outbreak of SARS-CoV-2 infection in a haematological unit – High mortality rate in infected patients with haematologic malignancies     | -                                   | Poland          | 19 patients with haematological malignancies and 20 health care workers | Compare morbidity and mortality in infected and non-infected patients after exposure to SARS-CoV-2.                                                                                                                                             |
| COVID-19 infection in hematopoietic cell transplantation: age, time from transplant and steroids matter                                            | -                                   | USA             | 34 haematopoietic stem cell transplant recipients                       | To identify mortality risk to HCT recipients                                                                                                                                                                                                    |
| COVID-19 in patients with hematological malignancies: A retrospective case series                                                                  | -                                   | Spain           | 41 patients with haematological malignancies                            | Characterize the real impact of COVID-19 in patients with hematological neoplasms, in order to optimize clinical decision-making.                                                                                                               |
| Clinical characteristics and outcome of multiple myeloma patients with concomitant COVID-19 at Comprehensive Cancer Centers in Germany             | -                                   | Germany         | 21 patients                                                             | Characterize a population of MM patients registered from 10 institutions who developed COVID-19 at hotspot areas in Germany                                                                                                                     |
| COVID-19, impact on myeloma patients                                                                                                               | -                                   | Belgium         | 20 patients with multiple myeloma                                       | Assess the impact of COVID-19 in the Belgian MM community,                                                                                                                                                                                      |

| Name of Study                                                                                                                                                      | Trial or Registration Number | Location | Number of patients and patient characteristics                | Primary endpoint                                                                                                                                                                                                                                                                        |
|--------------------------------------------------------------------------------------------------------------------------------------------------------------------|------------------------------|----------|---------------------------------------------------------------|-----------------------------------------------------------------------------------------------------------------------------------------------------------------------------------------------------------------------------------------------------------------------------------------|
| <b>Psychological Impact:</b>                                                                                                                                       |                              |          |                                                               |                                                                                                                                                                                                                                                                                         |
| COVID-19 Pandemic Impact on Patients With Cancer - a Danish Survey (COPICADS)                                                                                      | NCT04389996                  | Denmark  | 5000 patients                                                 | Overall Quality of Life                                                                                                                                                                                                                                                                 |
| Impact of the COVID-19 Pandemic and HRQOL in Cancer Patients and Survivors                                                                                         | NCT04447222                  | USA      | 1242 patients                                                 | Coronavirus disease-2019 (COVID19)-specific psychological distress                                                                                                                                                                                                                      |
| Impact of COVID-19 on Lung Cancer Patients                                                                                                                         | NCT04538456                  | UK       | 800 patients with lung cancer                                 | Physical, social impact and psychological impact                                                                                                                                                                                                                                        |
| Perception of the COVID-19 Pandemic in Patients With Haematological or Solid Neoplasias                                                                            | NCT04649320                  | Austria  | 300 patients with malignant disease (solid or haematological) | Influence of the COVID-19 pandemic on cancer patient's daily life                                                                                                                                                                                                                       |
| The effects of prevention and control measures on treatment and psychological status of cancer patients during the novel coronavirus pneumonia (COVID-19) outbreak | ChiCTR2000030686             | China    | 300 patients with malignant disease                           | The effects of prevention and control measures on treatment and psychological status of cancer patients during the novel coronavirus pneumonia (COVID-19) outbreak<br><a href="http://www.chictr.org.cn/showproj.aspx?proj=50714">http://www.chictr.org.cn/showproj.aspx?proj=50714</a> |

**eTable 14** Table of completed and ongoing cancer observational studies related to the SARS-CoV-2/COVID-19 pandemic in patients with malignant disease. AML, acute myeloid leukaemia.

**eFigure 20.** Forest Plot of Relative Risk of Mortality in Different Cancer Types in the Subgroup Analysis

A, Breast cancer and COVID-19, compared to patients with non-breast cancers and COVID-19. B, Gynaecological cancer and COVID-19, compared to patients with non-gynecological cancers and COVID-19. C, Patients with lung cancer and COVID-19 compared to patients with non-lung cancers and COVID-19. D, Patients with genitourinary cancer and COVID-19 compared to patients with non-genitourinary cancers and COVID-19. E, Patients with hematological malignancies and COVID-19 compared to patients with non-hematological malignancies and COVID-19.

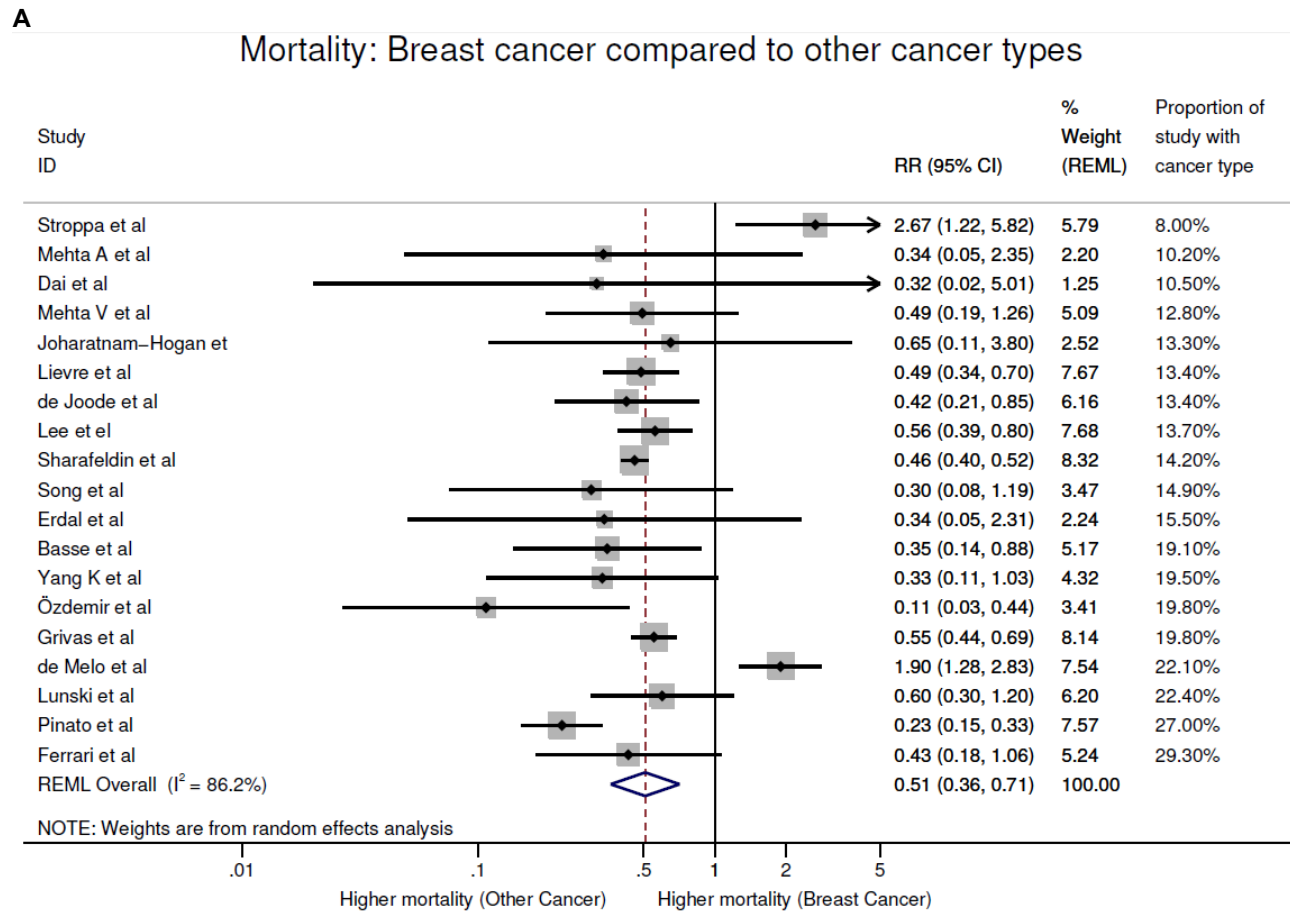



**B**

Mortality: Gynaecological cancer compared to other cancer types

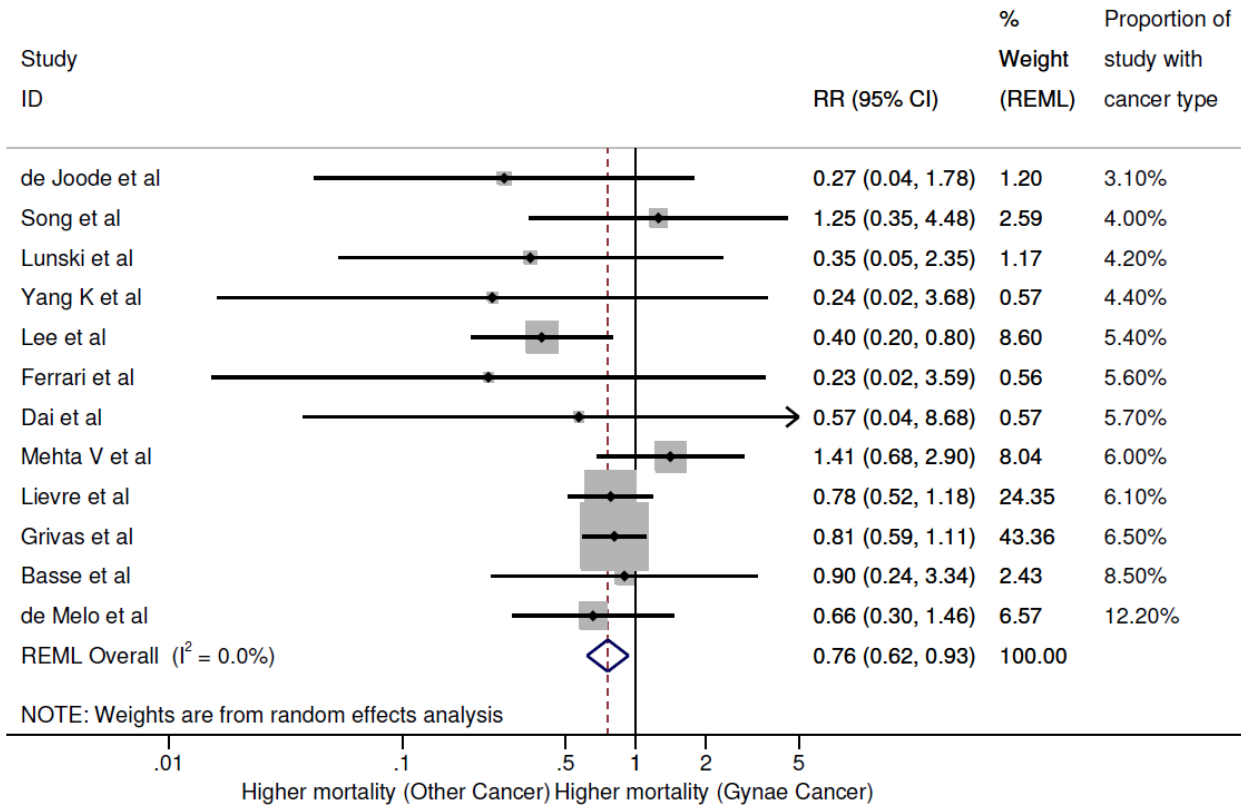

C

### Mortality: Lung cancer compared to other cancer types

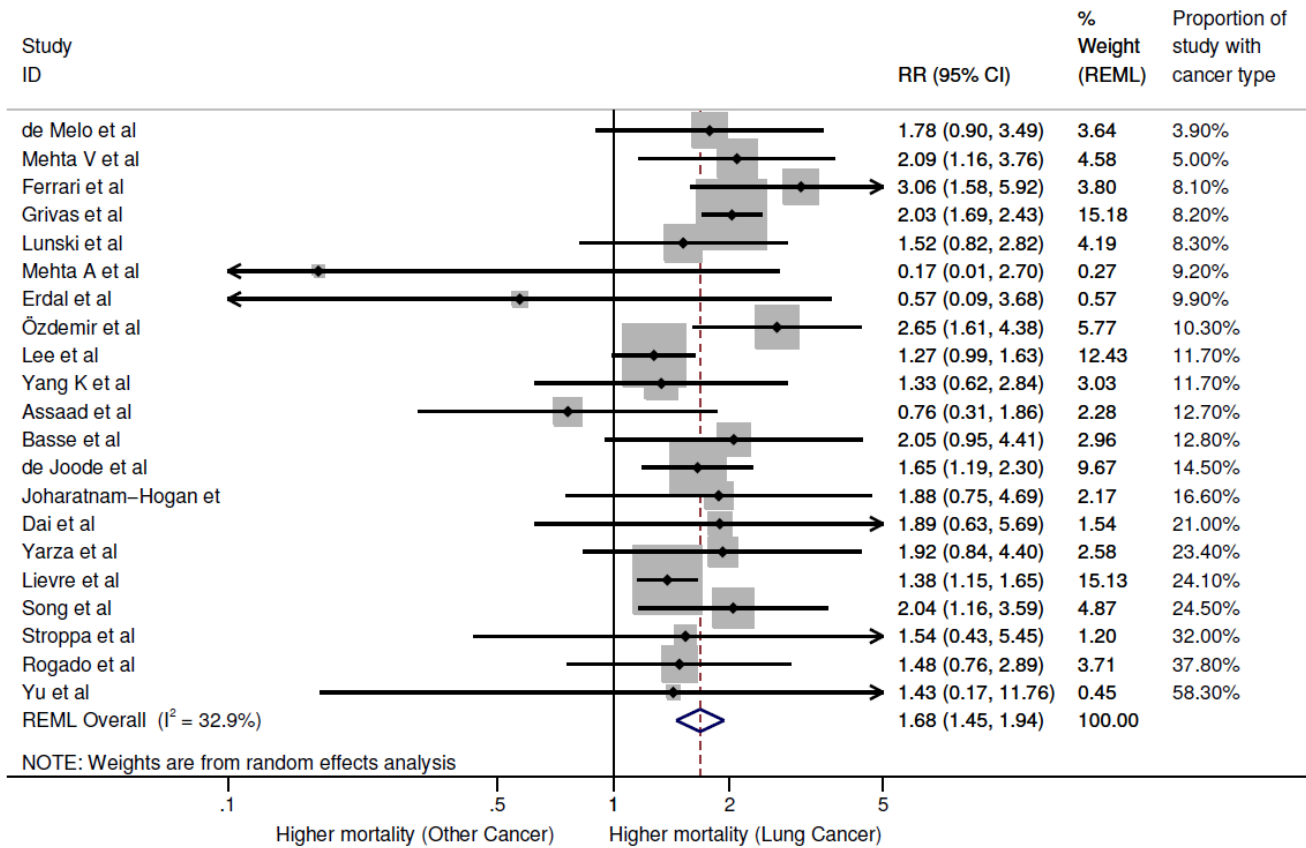

D

### Mortality: Genitourinary cancer compared to other cancer types

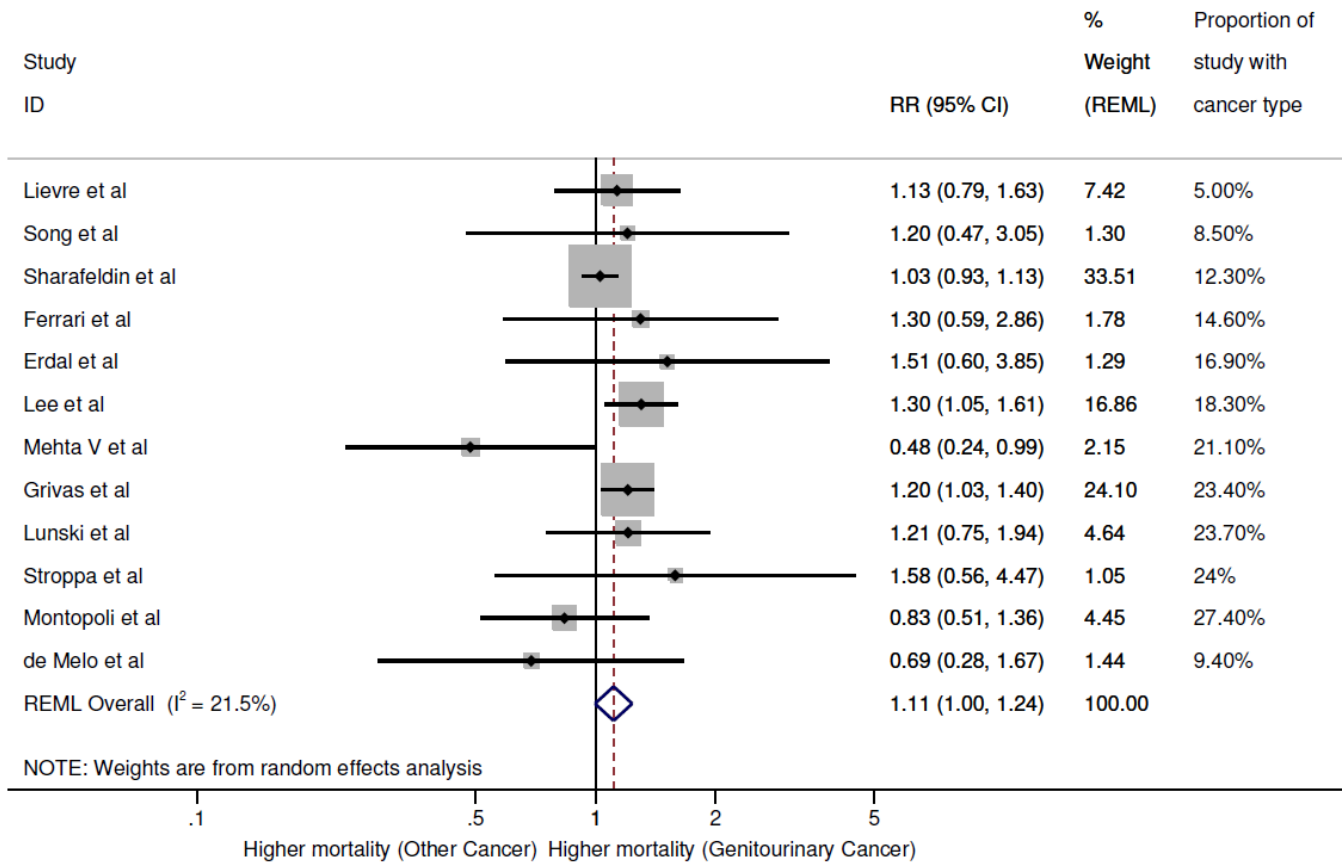

E

### Mortality: Haematological cancer compared to other cancer types

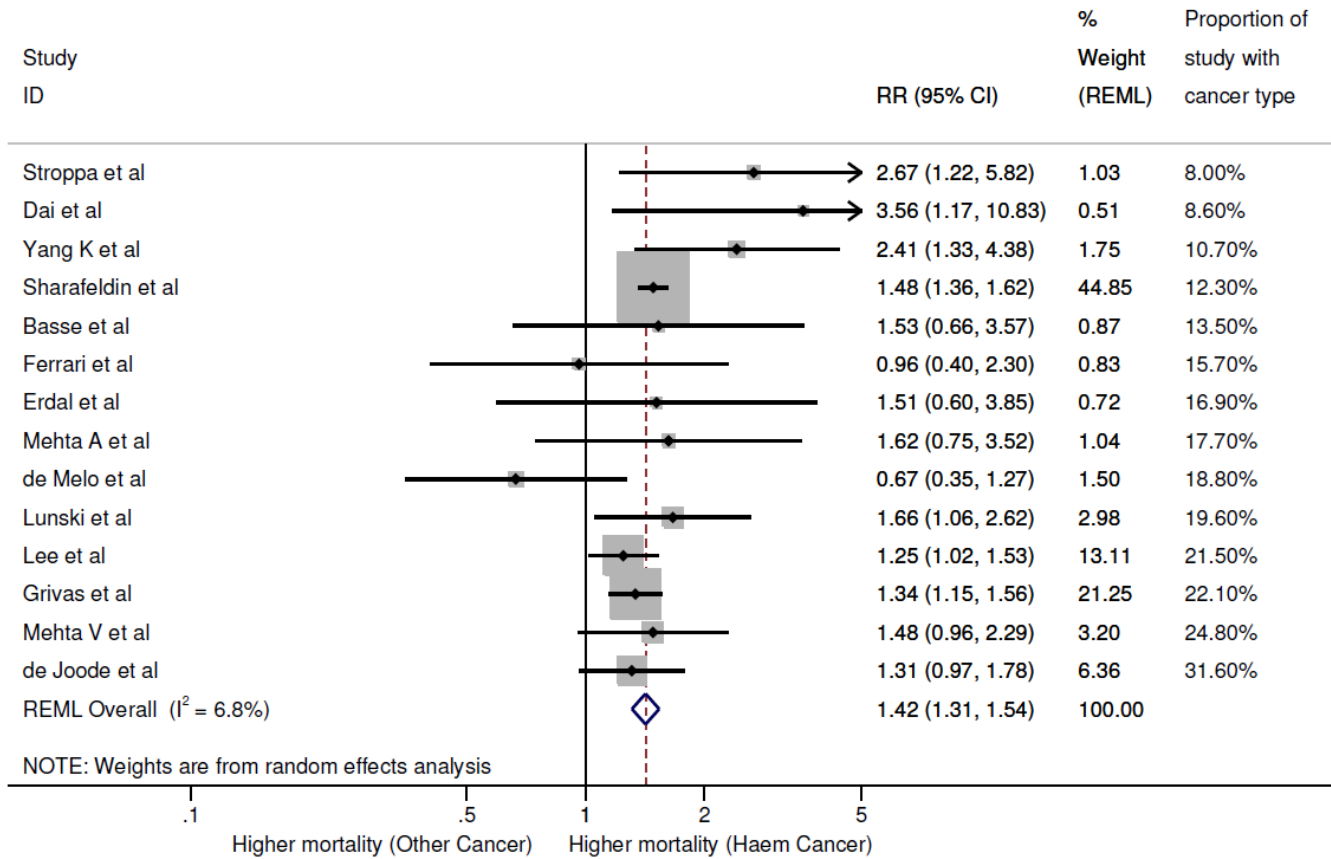

**eFigure 20. Continued**

A) Patients with gastrointestinal cancer and COVID-19, compared to patients with non-gastrointestinal cancers and COVID-19. B) Patients with skin cancer and COVID-19, compared to patients with non-skin cancers and COVID-19.

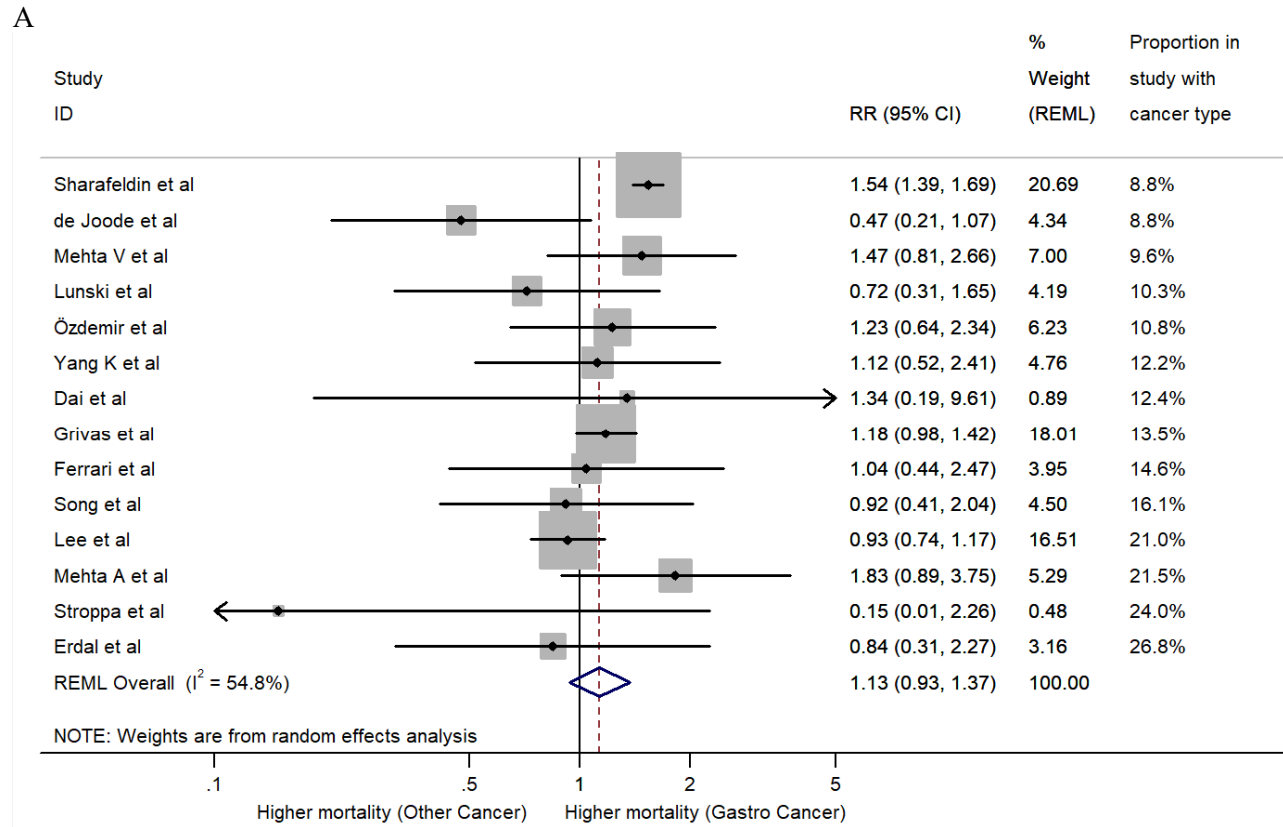

B

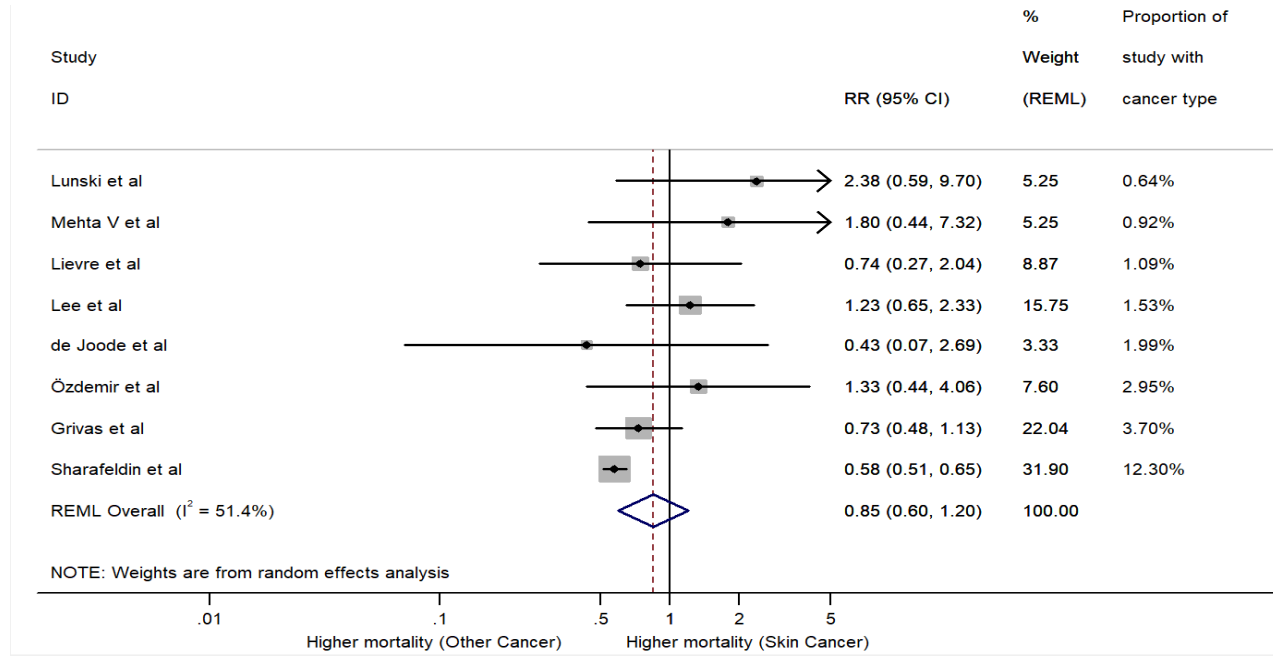

Supplement: jamanetwopen-e2210880-s001.pdf [file jamanetwopen-e2210880-s001.pdf]
